# Supplementary material for: Vibrational analysis of auranofin complexes with cysteine and selenocysteine unveils distinct binding motifs and specific unimolecular reactivity
Source: Royal Society of Chemistry journal article supplement (doi:10.1039/d4qi02023e), 2024-01-01
Supplement: d4qi02023e1.pdf [file d4qi02023e1.pdf]

## Supplementary Information

### Vibrational analysis of auranofin complexes with cysteine and selenocysteine unveils distinct binding motifs and specific unimolecular reactivity

Roberto Paciotti<sup>a,+,\*</sup>, Davide Corinti<sup>b,+,\*\*</sup>, Cecilia Coletti<sup>a</sup>, Nazzareno Re<sup>a</sup>, Giel Berden<sup>c</sup>, Jos Oomens<sup>c</sup>, Simonetta Fornarini<sup>b</sup>, Maria Elisa Crestoni<sup>b</sup>

<sup>a</sup> Dipartimento di Farmacia, Università G. D'Annunzio Chieti-Pescara, Via dei Vestini 31, Chieti I-66100, Italy

<sup>b</sup> Dipartimento di Chimica e Tecnologie del Farmaco, Università di Roma "La Sapienza", I-00185 Roma, Italy

<sup>c</sup> Radboud University, Institute for Molecules and Materials, FELIX Laboratory, Toernooiveld 7, 6525ED Nijmegen, the Netherlands

\*r.paciotti@unich.it ; \*\*davide.corinti@uniroma1.it

<sup>+</sup>The authors contributed equally.

### Table of contents

**Figure S1:** ESI mass spectrum in positive ion mode of the auranofin/cysteine solution.....8

**Figure S2:** ESI mass spectrum in positive ion mode of the auranofin/selenocysteine solution. The inset shows an enlargement of the [(Et<sub>3</sub>P)AuSec]<sup>+</sup> isotopic cluster (on top) compared to the theoretical one.....8

**Figure S3:** CID mass spectra of A) [(Et<sub>3</sub>P)AuCys]<sup>+</sup> at *m/z* 436 and B) [(Et<sub>3</sub>P)Au(Cys-NH<sub>3</sub>)]<sup>+</sup> mass-selected from the CID of *m/z* 436. ....9

**Figure S4:** CID mass spectra of A) [(Et<sub>3</sub>P)AuSec]<sup>+</sup> centered at *m/z* 484 and B) [(Et<sub>3</sub>P)Au(Sec-NH<sub>3</sub>)]<sup>+</sup> mass-selected from the CID of *m/z* 484. Enlargements of the isotopic clusters of *m/z* 465-467 and *m/z* 393-395 are reported in the insets. Differences in the relative ion abundancies are attributable to the tight fragmentation window of the instrument. ....9

**Figure S5:** Optimized geometries of the most stable **uSe** conformers of the [(Et<sub>3</sub>P)AuSec]<sup>+</sup> ion, computed in gas phase at B3LYP/BS1 level of theory. Free energy values relative to **uSe-1** are reported in parenthesis in kJ mol<sup>-1</sup>. Hydrogen bond distances (Å) are indicated by red dotted lines....10

**Figure S6:** Optimized geometries of the most stable **uN** conformers of the [(Et<sub>3</sub>P)AuSec]<sup>+</sup> ion, computed in gas phase at B3LYP/BS1 level of theory. Free energy values relative to **uSe-1** are reported in parenthesis in kJ mol<sup>-1</sup>. Hydrogen bond distances (Å) are indicated by red dotted lines....11

**Figure S7:** Optimized geometries of the most stable **uSeH** conformers of the [(Et<sub>3</sub>P)AuSec]<sup>+</sup> ion, computed in gas phase at B3LYP/BS1 level of theory. Free energy values relative to **uSe-1** are reported in parenthesis in kJ mol<sup>-1</sup>. Hydrogen bond distances (Å) are indicated by red dotted lines....12

**Figure S8:** Optimized geometries of the most stable conformers of **uCOO** and **uCOOH** isomers for the [(Et<sub>3</sub>P)AuSec]<sup>+</sup> ion, computed in gas phase at B3LYP/BS1 level of theory. Free energy values relative to **uSe-1** are reported in parenthesis in kJ mol<sup>-1</sup>. 5Hydrogen bond distances (Å) are indicated by red dotted lines. ....13

|                                                                                                                                                                                                                                                                                                                                                                                                                                                                                                       |    |
|-------------------------------------------------------------------------------------------------------------------------------------------------------------------------------------------------------------------------------------------------------------------------------------------------------------------------------------------------------------------------------------------------------------------------------------------------------------------------------------------------------|----|
| <b>Figure S9:</b> IRMPD spectrum of [(Et <sub>3</sub> P)AuSec] <sup>+</sup> . .....                                                                                                                                                                                                                                                                                                                                                                                                                   | 13 |
| <b>Figure S10:</b> IRMPD spectrum (red profile) of [(Et <sub>3</sub> P)AuSec] <sup>+</sup> ion and calculated harmonic IR spectra (green profiles) of the lowest lying conformers of <b>uSe</b> isomer, computed at the B3LYP/BS1 level of theory. Free energies relative to <b>uSe-1</b> are reported in brackets (kJ mol <sup>-1</sup> ). Harmonic frequencies computed in the 900–1900 and 2000-3600 cm <sup>-1</sup> ranges were scaled by 0.985 and 0.955, respectively. ....                    | 14 |
| <b>Figure S11:</b> IRMPD spectrum (red profile) of [(Et <sub>3</sub> P)AuSec] <sup>+</sup> ion and calculated harmonic IR spectra (green profiles) of the lowest lying conformers of <b>uSe</b> isomer, computed at the B3LYP/BS1 level of theory. Free energies relative to <b>uSe-1</b> are reported in brackets (kJ mol <sup>-1</sup> ). Harmonic frequencies computed in the 900–1900 and 2000-3600 cm <sup>-1</sup> ranges were scaled by 0.985 and 0.955, respectively. ....                    | 15 |
| <b>Figure S12:</b> IRMPD spectrum (red profile) of [(Et <sub>3</sub> P)AuSec] <sup>+</sup> ion and calculated harmonic IR spectra (green profiles) of the lowest lying conformers of <b>uN</b> isomer, computed at the B3LYP/BS1 level of theory. Free energies relative to <b>uSe-1</b> are reported in brackets (kJ mol <sup>-1</sup> ). Harmonic frequencies computed in the 900–1900 and 2000-3600 cm <sup>-1</sup> ranges were scaled by 0.985 and 0.955, respectively. ....                     | 16 |
| <b>Figure S13:</b> IRMPD spectrum (red profile) of [(Et <sub>3</sub> P)AuSec] <sup>+</sup> ion and calculated harmonic IR spectra (green profiles) of the lowest lying conformers of <b>uN</b> isomer, computed at the B3LYP/BS1 level of theory. Free energies relative to <b>uSe-1</b> are reported in brackets (kJ mol <sup>-1</sup> ). Harmonic frequencies computed in the 900–1900 and 2000-3600 cm <sup>-1</sup> ranges were scaled by 0.985 and 0.955, respectively. ....                     | 17 |
| <b>Figure S14:</b> IRMPD spectrum (red profile) of [(Et <sub>3</sub> P)AuSec] <sup>+</sup> ion and calculated harmonic IR spectra (green profiles) of the lowest lying conformers of <b>uSeH</b> isomer, computed at the B3LYP/BS1 level of theory. Free energies relative to <b>uSe-1</b> are reported in brackets (kJ mol <sup>-1</sup> ). Harmonic frequencies computed in the 900–1900 and 2000-39600 cm <sup>-1</sup> ranges were scaled by 0.985 and 0.955, respectively. ....                  | 18 |
| <b>Figure S15:</b> IRMPD spectrum (red profile) of [(Et <sub>3</sub> P)AuSec] <sup>+</sup> ion and calculated harmonic IR spectra (green profiles) of the lowest lying conformers of <b>uSeH</b> isomer, computed at the B3LYP/BS1 level of theory. Free energies relative to <b>uSe-1</b> are reported in brackets (kJ mol <sup>-1</sup> ). Harmonic frequencies computed in the 900–1900 and 2000-3600 cm <sup>-1</sup> ranges were scaled by 0.985 and 0.955, respectively. ....                   | 19 |
| <b>Figure S16:</b> IRMPD spectrum (red profile) of [(Et <sub>3</sub> P)AuSec] <sup>+</sup> ion and calculated harmonic IR spectra (green profiles) of the lowest lying conformers of <b>uCOOH</b> and <b>uCOO</b> isomers, computed at the B3LYP/BS1 level of theory. Free energies relative to <b>uSe-1</b> are reported in brackets (kJ mol <sup>-1</sup> ). Harmonic frequencies computed in the 900–1900 and 2000-3600 cm <sup>-1</sup> ranges were scaled by 0.985 and 0.955, respectively. .... | 20 |
| <b>Figure S17:</b> Optimized geometries of the most stable <b>cN</b> conformers of the [(Et <sub>3</sub> P)AuCys] <sup>+</sup> ion, computed in gas phase at B3LYP/BS1 level of theory. Free energy values relative to <b>cN-1</b> are reported in parenthesis in kJ mol <sup>-1</sup> . Hydrogen bond distances (Å) are indicated by red dotted lines....                                                                                                                                            | 21 |

**Figure S18:** Optimized geometries of the most stable **cS** conformers of the  $[(Et_3P)AuCys]^+$  ion, computed in gas phase at B3LYP/BS1 level of theory. Free energy values relative to **cN-1** are reported in parenthesis in  $\text{kJ mol}^{-1}$ . Hydrogen bond distances ( $\text{\AA}$ ) are indicated by red dotted lines....22

**Figure S19:** Optimized geometries of the most stable **cSH** conformers of the  $[(Et_3P)AuCys]^+$  ion, computed in gas phase at B3LYP/BS1 level of theory. Free energy values relative to **cN-1** are reported in parenthesis in  $\text{kJ mol}^{-1}$ . Hydrogen bond distances ( $\text{\AA}$ ) are indicated by red dotted lines....23

**Figure S20:** Optimized geometries of the most stable conformers of **cCOO** and **cCOOH** isomers for the  $[(Et_3P)AuCys]^+$  ion, computed in gas phase at B3LYP/BS1 level of theory. Free energy values relative to **cN-1** are reported in parenthesis in  $\text{kJ mol}^{-1}$ . Hydrogen bond distances ( $\text{\AA}$ ) are indicated by red dotted lines.....24

**Figure S21:** IRMPD spectrum of  $[(Et_3P)AuCys]^+$ .....24

**Figure S22:** IRMPD spectrum (orange profile) of  $[(Et_3P)AuCys]^+$  ion and calculated harmonic IR spectra (blue profiles) of the lowest lying conformers of **cN** isomer, computed at the B3LYP/BS1 level of theory. Free energies relative to **cN-1** are reported in brackets ( $\text{kJ mol}^{-1}$ ). Harmonic frequencies computed in the 900–1900 and 2700-3900  $\text{cm}^{-1}$  ranges were scaled by 0.985 and 0.955, respectively. ....25

**Figure S23:** IRMPD spectrum (orange profile) of  $[(Et_3P)AuCys]^+$  ion and calculated harmonic IR spectra (blue profiles) of the lowest lying conformers of **cN** isomer, computed at the B3LYP/BS1 level of theory. Free energies relative to **cN-1** are reported in brackets ( $\text{kJ mol}^{-1}$ ). Harmonic frequencies computed in the 900–1900 and 2700-3900  $\text{cm}^{-1}$  ranges were scaled by 0.985 and 0.955, respectively. ....26

**Figure S24:** IRMPD spectrum (orange profile) of  $[(Et_3P)AuCys]^+$  ion and calculated harmonic IR spectra (blue profiles) of the lowest lying conformers of **cS** isomer, computed at the B3LYP/BS1 level of theory. Free energies relative to **cN-1** are reported in brackets ( $\text{kJ mol}^{-1}$ ). Harmonic frequencies computed in the 900–1900 and 2700-3900  $\text{cm}^{-1}$  ranges were scaled by 0.985 and 0.955, respectively. ....27

**Figure S25:** IRMPD spectrum (orange profile) of  $[(Et_3P)AuCys]^+$  ion and calculated harmonic IR spectra (blue profiles) of the lowest lying conformers of **cS** isomer, computed at the B3LYP/BS1 level of theory. Free energies relative to **cN-1** are reported in brackets ( $\text{kJ mol}^{-1}$ ). Harmonic frequencies computed in the 900–1900 and 2700-3900  $\text{cm}^{-1}$  ranges were scaled by 0.985 and 0.955, respectively. ....28

**Figure S26:** IRMPD spectrum (orange profile) of  $[(Et_3P)AuCys]^+$  ion and calculated harmonic IR spectra (blue profiles) of the lowest lying conformers of **cSH** isomer, computed at the B3LYP/BS1 level of theory. Free energies relative to **cN-1** are reported in brackets ( $\text{kJ mol}^{-1}$ ). Harmonic frequencies computed in the 900–1900 and 2700-3900  $\text{cm}^{-1}$  ranges were scaled by 0.985 and 0.955, respectively. ....29

**Figure S27:** IRMPD spectrum (orange profile) of  $[(Et_3P)AuCys]^+$  ion and calculated harmonic IR spectra (blue profiles) of the lowest lying conformers of **cSH** isomer, computed at the B3LYP/BS1 level of theory. Free energies relative to **cN-1** are reported in brackets ( $\text{kJ mol}^{-1}$ ). Harmonic

frequencies computed in the 900–1900 and 2700-3900  $\text{cm}^{-1}$  ranges were scaled by 0.985 and 0.955, respectively. ....30

**Figure S29:** IRMPD spectrum (orange profile) of  $[(\text{Et}_3\text{P})\text{AuCys}]^+$  ion and calculated harmonic and anharmonic IR spectra (blue profiles) of **cN-1** and **cS-1**, computed at the B3LYP/BS1 level of theory. Free energies relative to **cN-1** are reported in brackets ( $\text{kJ mol}^{-1}$ ). Harmonic frequencies computed in the 900–1900 and 2700-3900  $\text{cm}^{-1}$  ranges were scaled by 0.985 and 0.955, respectively. The anharmonic averaged spectra are built by considering the contributions of **cN-1** and **cS-1** to the Boltzmann population weighted according to their relative free energy computed in 50:50 water-methanol mixture (see Table 1 for additional details). ....32

**Figure S30:** possible pathways for the deamination process of  $[(\text{Et}_3\text{P})\text{AuSec}]^+$  and  $[(\text{Et}_3\text{P})\text{AuCys}]^+$  ions in CID experiments leading to A) 3-sulfanylidenepranoic acid or 3-selenyidenepranoic acid derivatives (**u\*Se-1** or **c\*S-1**) and B) 3-selanylprop-2-enoic acid or 3-sulfanylprop-2-enoic acid derivatives (**u\*Se-2** or **c\*S-2**). X is the Se or S atom for  $[(\text{Et}_3\text{P})\text{AuSec}]^+$  and  $[(\text{Et}_3\text{P})\text{AuCys}]^+$ , respectively. ....33

**Figure S31:** possible pathways for the deamination process of  $[(\text{Et}_3\text{P})\text{AuSec}]^+$  and  $[(\text{Et}_3\text{P})\text{AuCys}]^+$  ions in CID experiments leading to A) 1-(selanylcylopropan-2-yl)methanoic acid or 1-(thiacyclopropan-2-yl)methanoic acid derivatives (**u\*Se-1** or **c\*S-1**). X is the Se or S atom for  $[(\text{Et}_3\text{P})\text{AuSec}]^+$  and  $[(\text{Et}_3\text{P})\text{AuCys}]^+$ , respectively. ....33

**Figure S32:** Relaxed potential energy scans for  $\text{NH}_3$  loss (blue profile) and  $\text{Se}-\text{Au}^{\text{I}}$  bond breaking (red profile) as a function of the respective reaction coordinates:  $\text{C}_\alpha-\text{NH}_3^+$  (blue) and  $\text{Au}^{\text{I}}-\text{Se}$  (red) bond distances for **cSe-1**. The scan step was 0.25 Å for a total of 45 steps. Relative electronic energies of transition state and the last step are reported for both reaction paths. The reaction energy computed considering reactants and products at infinite distance are reported in black. Calculations were performed at the B3LYP level of theory using the B3LYP/6-311+G(d,p)//LANL2DZ basis set in the gas phase. The structures of step 4, 5, 45 (blue profile) and 45 (red profile) are reported in Figure S34 and S35, respectively. ....34

**Figure S33:** Relative electronic energies curves on  $\text{NH}_3$  loss (blue profile) and  $\text{S}-\text{Au}^{\text{I}}$  bond breaking (red profile) reactions as a function of the  $\text{C}_\alpha-\text{NH}_3^+$  (blue profile) and  $\text{Au}^{\text{I}}-\text{S}$  (red profile) distances for **cS-1** obtained by relaxed scan calculations. The scan step was 0.25 Å for a total of 45 steps. Relative electronic energies of transition state and the last step are reported for both reaction paths. The reaction energy computed considering reactants and products at infinite distance are reported in black. Calculations were performed at the B3LYP level of theory using the B3LYP/6-311+G(d,p)//LANL2DZ basis set in the gas phase. The structures of step 5, 6, 45 (blue profile) and 6,7, 45 (red profile) are reported in Figure S36 and S37, respectively. ....35

**Figure S34:** Most relevant optimized geometries of the relaxed scan calculations at the B3LYP/6-311+G(d,p)//LANL2DZ, computed for  $[(\text{Et}_3\text{P})\text{AuSec}]^+$  along the  $\text{C}_\alpha-\text{NH}_3^+$  bond breaking reaction coordinate by using a step of 0.25 Å for a total of 45 steps (Figure S32, blue profile): A) optimized geometries of the first (**uSe-1**) and the last step (45) of scan calculation; B) optimized structures of highest energy step (step 4) and of the following one (step 5) along the reaction coordinate. The carbon  $\text{C}_\alpha$  attacked by the Se atom is colored in green. Electron energies relative to the starting geometry (**uSe-1**) are reported in brackets ( $\text{kJ mol}^{-1}$ ). ....36

**Figure S35:** Most relevant optimized geometries of the relaxed scan calculations at the B3LYP/6-311+G(d,p)/LANL2DZ, computed for [(Et<sub>3</sub>P)AuSec]<sup>+</sup> along the Au<sup>I</sup>-Se bond breaking reaction coordinate by using a step of 0.25 Å for a total of 45 steps (Figure S32, red profile): (on the top) optimized geometries of the first (**uSe-1**) and (on the bottom) the last step (45) of scan calculation. Notably, at the end of the scan calculation Sec remains in its zwitterionic state although the neutral form (SeH, NH<sub>2</sub>, COOH) is the lowest energy isomer when considered as an isolated species in the gas-phase. Electron energies relative to the starting geometry (**uSe-1**) are reported in brackets (kJ mol<sup>-1</sup>). .....37

**Figure S36:** Most relevant optimized geometries of the relaxed scan calculations at the B3LYP/6-311+G(d,p)/LANL2DZ level of theory, computed for [(Et<sub>3</sub>P)AuCys]<sup>+</sup> along the C<sub>α</sub>-NH<sub>3</sub><sup>+</sup> bond breaking reaction coordinate by using a step of 0.25 Å for a total of 45 steps (Figure S33, blue profile): A) optimized geometries of the first (**cS-1**) and the last step (45) of scan calculation; B) optimized structures of highest energy step (step 5) and of the following one (step 6) along the reaction coordinate. The hydride (H) transferred to C<sub>α</sub> is colored in green. Electron energies relative to the starting geometry (**cS-1**) are reported in brackets (kJ mol<sup>-1</sup>). .....38

**Figure S37:** Most relevant optimized geometries of the relaxed scan calculations at the B3LYP/6-311+G(d,p)/LANL2DZ, computed for [(Et<sub>3</sub>P)AuCys]<sup>+</sup> along the Au<sup>I</sup>-S bond breaking reaction coordinate by using a step of 0.25 Å for a total of 45 steps (Figure S34, red profile): A) optimized geometries of the first (**cS-1**) and the last step (45) of scan calculation; B) optimized structures of hypothetical transition state (step 6) and of the subsequent step (step 7) along the reaction coordinate. The H atom transferred to S- from the amino group is colored in green. Electron energies relative to the starting geometry (**cS-1**) are reported in brackets (kJ mol<sup>-1</sup>). .....39

**Figure S38:** Optimized geometries along with IRMPD spectrum (red profiles) and calculated harmonic IR spectra (green profiles) of the lowest energy isomers of the [(Et<sub>3</sub>P)AuSec\*]<sup>+</sup> ion, computed in gas phase at B3LYP/BS1 level of theory. Harmonic frequencies computed in the 700–1900 cm<sup>-1</sup> range were scaled by 0.985. Free energy values relative to **u\*Se-3** are reported in parenthesis in kJ mol<sup>-1</sup>. .....40

**Figure S39:** Optimized geometries along with IRMPD spectrum (orange profiles) and calculated harmonic IR spectra (blue profiles) of the lowest energy isomers of the [(Et<sub>3</sub>P)AuCys\*]<sup>+</sup> ion, computed in gas phase at B3LYP/BS1 level of theory. Harmonic frequencies computed in the 700–1900 cm<sup>-1</sup> range were scaled by 0.985. Free energy values relative to **c\*S-1** are reported in parenthesis in kJ mol<sup>-1</sup>. .....41

**Table S1:** relative free energies of isomers and conformers of [(Et<sub>3</sub>P)AuSec]<sup>+</sup> ion optimized in the gas phase at the B3LYP/BS1 level of theory. ....42

**Table S2:** IRMPD absorptions of [(Et<sub>3</sub>P)AuSec]<sup>+</sup> ion and calculated vibrational frequencies (cm<sup>-1</sup>) for **uSe-1**. Calculated intensities are reported in parentheses (km mol<sup>-1</sup>). Calculated frequencies in the fingerprint (1900-700 cm<sup>-1</sup>) and X-H stretching (2000-3900 cm<sup>-1</sup>) ranges are scaled by factors of 0.985 and 0.955, respectively. Modes with intensity lower than 50 km mol<sup>-1</sup> are omitted. ....43

**Table S3:** IRMPD absorptions of [(Et<sub>3</sub>P)AuSec]<sup>+</sup> ion and calculated vibrational frequencies (cm<sup>-1</sup>) for **uN-1**. Calculated intensities are reported in parentheses (km mol<sup>-1</sup>). Calculated frequencies in the fingerprint (1900-700 cm<sup>-1</sup>) and X-H stretching (2000-3900 cm<sup>-1</sup>) ranges are scaled by factors of 0.985 and 0.955, respectively. Modes with intensity lower than 50 km mol<sup>-1</sup> are omitted. ....44

|                                                                                                                                                                                                                                                                                                                                                                                                                                                                                                               |    |
|---------------------------------------------------------------------------------------------------------------------------------------------------------------------------------------------------------------------------------------------------------------------------------------------------------------------------------------------------------------------------------------------------------------------------------------------------------------------------------------------------------------|----|
| <b>Table S4:</b> IRMPD absorptions of [(Et <sub>3</sub> P)AuSec] <sup>+</sup> ion and calculated vibrational frequencies (cm <sup>-1</sup> ) for <b>uSeH-1</b> . Calculated intensities are reported in parentheses (km mol <sup>-1</sup> ). Calculated frequencies in the fingerprint (1900-700 cm <sup>-1</sup> ) and X-H stretching (2000-3900 cm <sup>-1</sup> ) ranges are scaled by factors of 0.985 and 0.955, respectively. Modes with intensity lower than 50 km mol <sup>-1</sup> are omitted. .... | 45 |
| <b>Table S5:</b> relative free energies of isomers and conformers of [(Et <sub>3</sub> P)AuCys] <sup>+</sup> ion optimized in the gas phase at the B3LYP/BS1 level of theory. ....                                                                                                                                                                                                                                                                                                                            | 46 |
| <b>Table S6:</b> IRMPD absorptions of [(Et <sub>3</sub> P)AuCys] <sup>+</sup> ion and calculated vibrational frequencies (cm <sup>-1</sup> ) for <b>cN-1</b> . Calculated intensities are reported in parentheses (km mol <sup>-1</sup> ). Calculated frequencies in the fingerprint (1900-700 cm <sup>-1</sup> ) and X-H stretching (2700-3900 cm <sup>-1</sup> ) ranges are scaled by factors of 0.985 and 0.955, respectively. Modes with intensity lower than 50 km mol <sup>-1</sup> are omitted. ....   | 47 |
| <b>Table S7:</b> IRMPD absorptions of [(Et <sub>3</sub> P)AuCys] <sup>+</sup> ion and calculated vibrational frequencies (cm <sup>-1</sup> ) for <b>cS-1</b> . Calculated intensities are reported in parentheses (km mol <sup>-1</sup> ). Calculated frequencies in the fingerprint (1900-700 cm <sup>-1</sup> ) and X-H stretching (2700-3900 cm <sup>-1</sup> ) ranges are scaled by factors of 0.985 and 0.955, respectively. Modes with intensity lower than 50 km mol <sup>-1</sup> are omitted. ....   | 48 |
| <b>Table S8:</b> IRMPD absorptions of [(Et <sub>3</sub> P)AuCys] <sup>+</sup> ion and calculated vibrational frequencies (cm <sup>-1</sup> ) for <b>cSH-1</b> . Calculated intensities are reported in parentheses (km mol <sup>-1</sup> ). Calculated frequencies in the fingerprint (1900-700 cm <sup>-1</sup> ) and X-H stretching (2700-3900 cm <sup>-1</sup> ) ranges are scaled by factors of 0.985 and 0.955, respectively. Modes with intensity lower than 50 km mol <sup>-1</sup> are omitted. ....  | 49 |
| <b>Table S9:</b> relative free energies of isomers and conformers of deaminated [(Et <sub>3</sub> P)AuSec*] <sup>+</sup> and [(Et <sub>3</sub> P)AuCys*] <sup>+</sup> ions optimized in the gas phase at the B3LYP/BS1 level of theory. ....                                                                                                                                                                                                                                                                  | 50 |
| <b>Table S10:</b> IRMPD absorptions of [(Et <sub>3</sub> P)AuSec*] <sup>+</sup> ion and calculated vibrational frequencies (cm <sup>-1</sup> ) for <b>u*Se-3</b> . Calculated intensities are reported in parentheses (km mol <sup>-1</sup> ). Calculated frequencies in the fingerprint (1900-700 cm <sup>-1</sup> ) and range are scaled by factors of 0.985. Non relevant modes with intensity lower than 50 km mol <sup>-1</sup> are omitted. ....                                                        | 50 |
| <b>Table S11:</b> IRMPD absorptions of [(Et <sub>3</sub> P)AuSec*] <sup>+</sup> ion and calculated vibrational frequencies (cm <sup>-1</sup> ) for <b>u*Se-1</b> . Calculated intensities are reported in parentheses (km mol <sup>-1</sup> ). Calculated frequencies in the fingerprint (1900-700 cm <sup>-1</sup> ) and range are scaled by factors of 0.985. Non relevant modes with intensity lower than 50 km mol <sup>-1</sup> are omitted. ....                                                        | 51 |
| <b>Table S12:</b> IRMPD absorptions of [(Et <sub>3</sub> P)AuCys*] <sup>+</sup> ion and calculated vibrational frequencies (cm <sup>-1</sup> ) for <b>c*S-1</b> . Calculated intensities are reported in parentheses (km mol <sup>-1</sup> ). Calculated frequencies in the fingerprint (1900-700 cm <sup>-1</sup> ) and range are scaled by factors of 0.985. Non relevant modes with intensity lower than 50 km mol <sup>-1</sup> are omitted. ....                                                         | 52 |
| <b>Table S13:</b> IRMPD absorptions of [(Et <sub>3</sub> P)AuCys*] <sup>+</sup> ion and calculated vibrational frequencies (cm <sup>-1</sup> ) for <b>c*S-3</b> . Calculated intensities are reported in parentheses (km mol <sup>-1</sup> ). Calculated frequencies in the fingerprint (1900-700 cm <sup>-1</sup> ) and range are scaled by factors of 0.985. Non relevant modes with intensity lower than 50 km mol <sup>-1</sup> are omitted. ....                                                         | 53 |

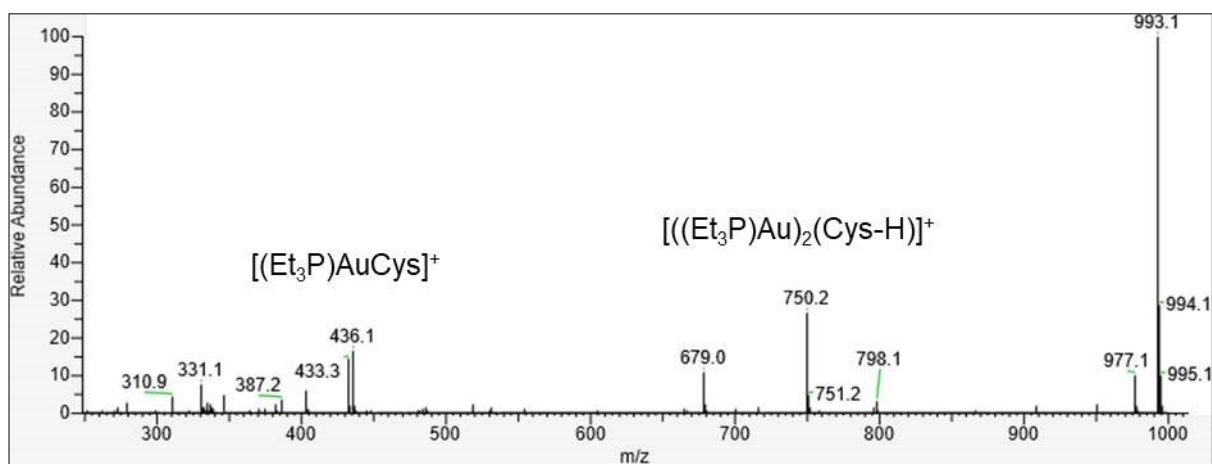

**Figure S1:** ESI mass spectrum in positive ion mode of the auranofin/cysteine solution.

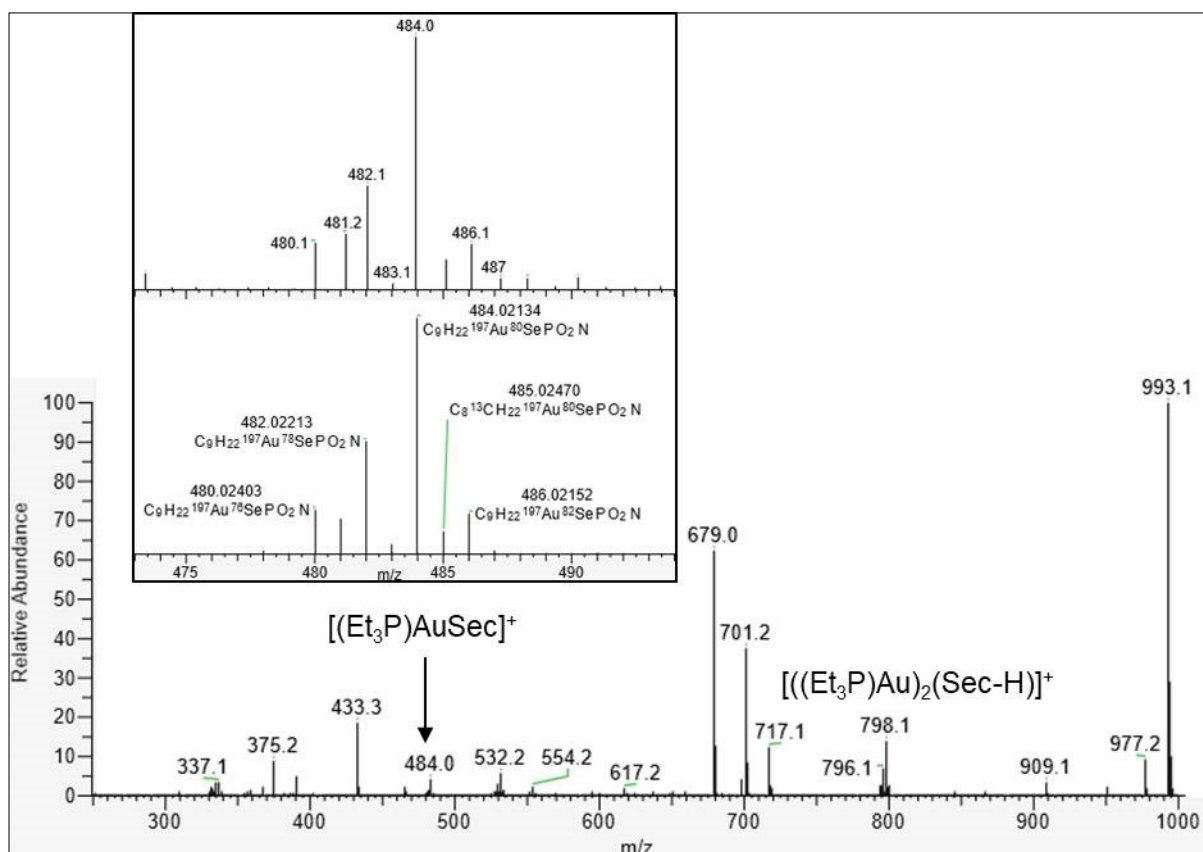

**Figure S2:** ESI mass spectrum in positive ion mode of the auranofin/selenocysteine solution. The inset shows an enlargement of the  $[(\text{Et}_3\text{P})\text{AuSec}]^+$  isotopic cluster (on top) compared to the theoretical one.

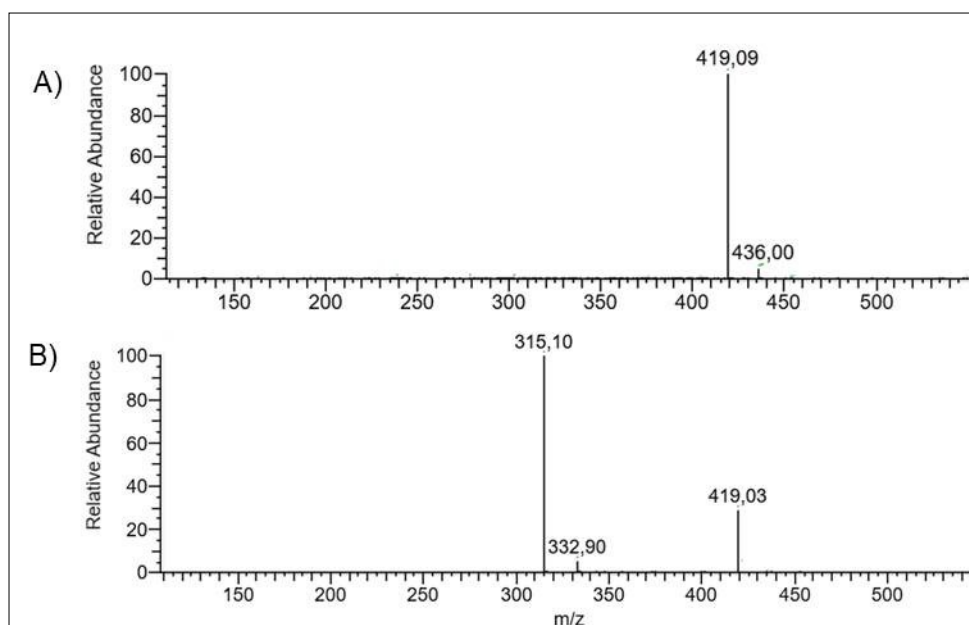

**Figure S3:** CID mass spectra of A)  $[(Et_3P)AuCys]^+$  at  $m/z$  436 and B)  $[(Et_3P)Au(Cys-NH_3)]^+$  mass-selected from the CID of  $m/z$  436.

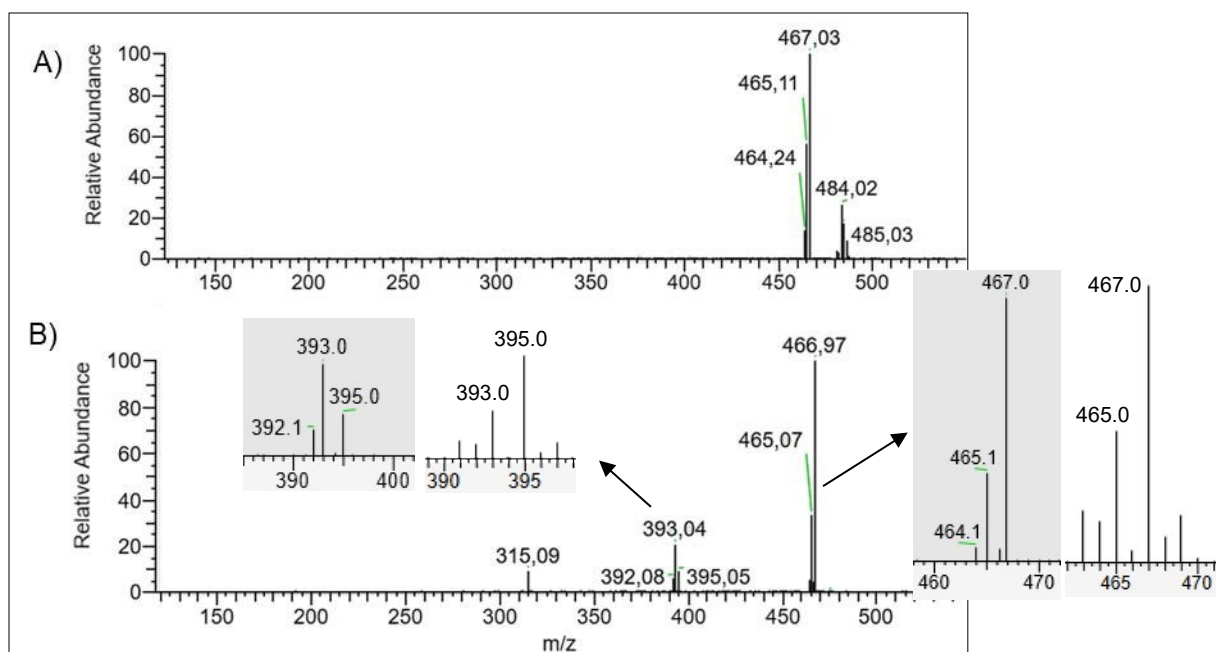

**Figure S4:** CID mass spectra of A)  $[(Et_3P)AuSec]^+$  centered at  $m/z$  484 and B)  $[(Et_3P)Au(Sec-NH_3)]^+$  mass-selected from the CID of  $m/z$  484. Enlargements of the isotopic clusters of  $m/z$  465-467 and  $m/z$  393-395 are reported in the insets (left panel, grey background) compared to the calculated ones. Variations in the relative ion abundances are due to the narrow fragmentation window of the instrument, which limits uniform activation of the ions contributing to the isotopic pattern.



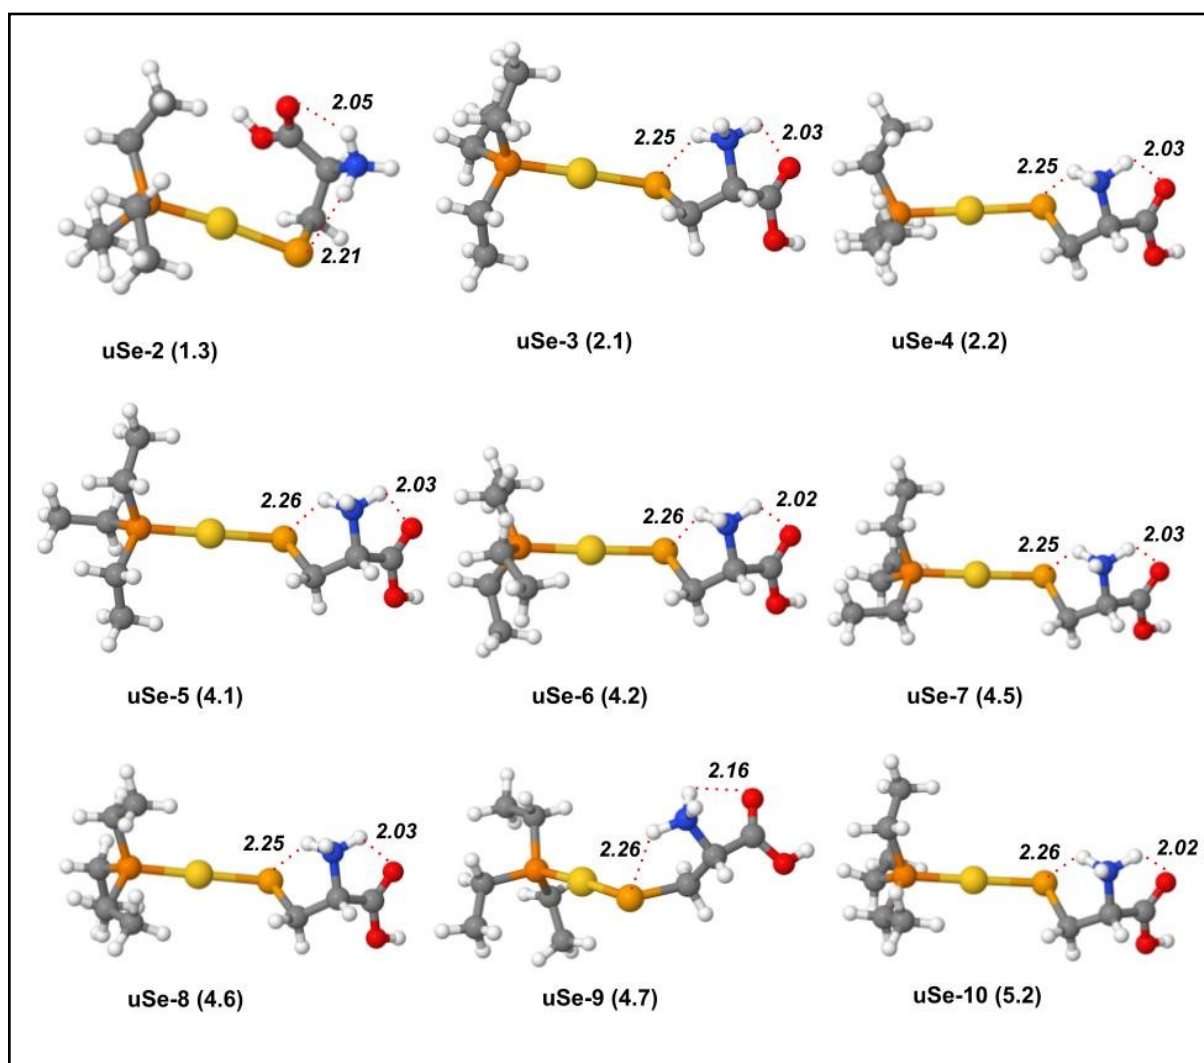

**Figure S5:** Optimized geometries of the most stable **uSe** conformers of the  $[(Et_3P)AuSec]^+$  ion, computed in gas phase at B3LYP/BS1 level of theory. Free energy values relative to **uSe-1** are reported in parenthesis in kJ mol<sup>-1</sup>. Hydrogen bond distances (Å) are indicated by red dotted lines.

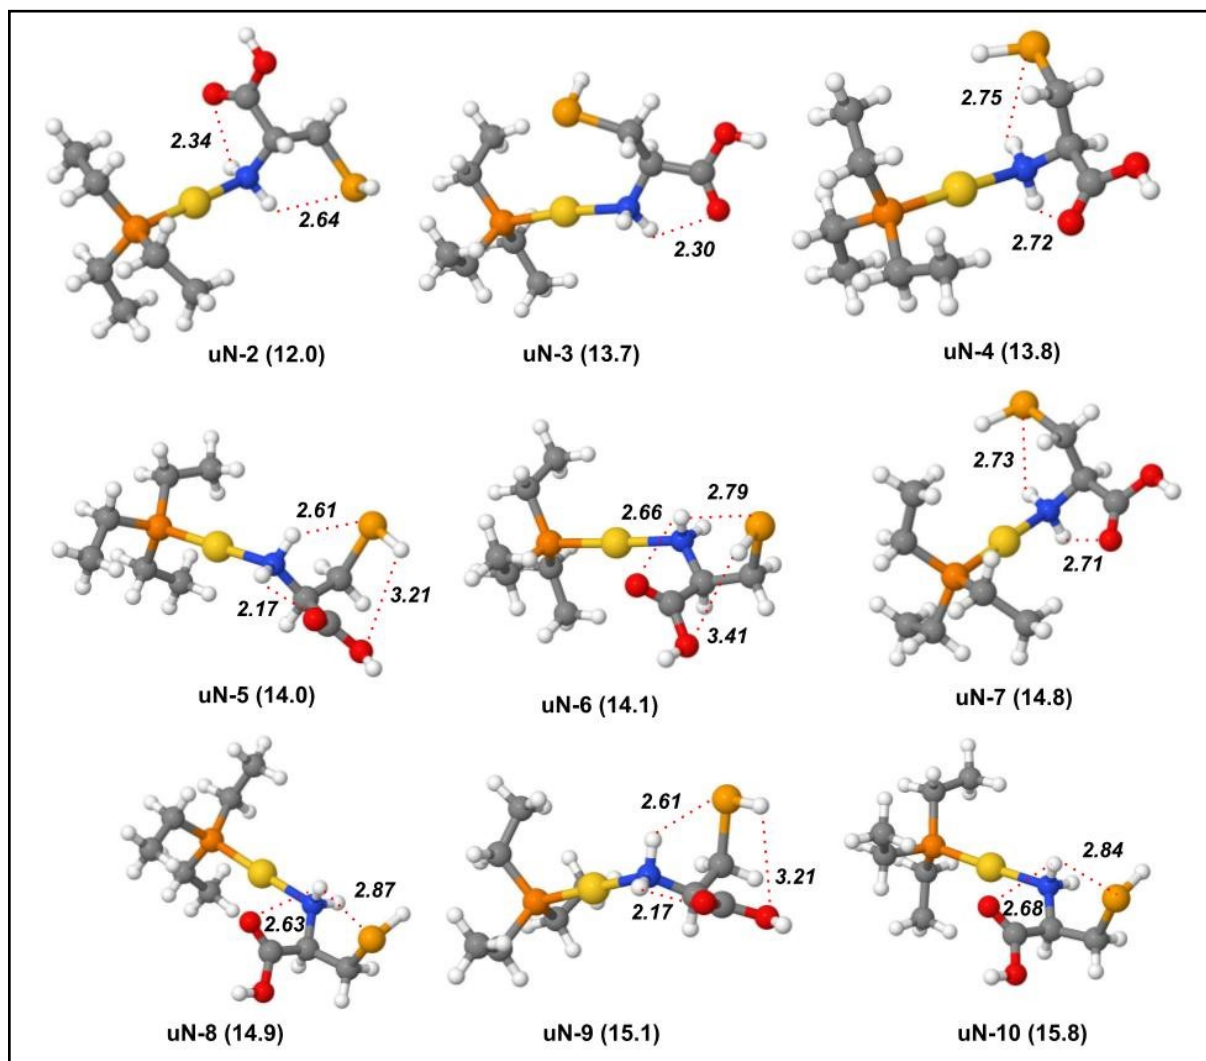

**Figure S6:** Optimized geometries of the most stable **uN** conformers of the  $[(\text{Et}_3\text{P})\text{AuSec}]^+$  ion, computed in gas phase at B3LYP/BS1 level of theory. Free energy values relative to **uSe-1** are reported in parenthesis in  $\text{kJ mol}^{-1}$ . Hydrogen bond distances ( $\text{\AA}$ ) are indicated by red dotted lines.

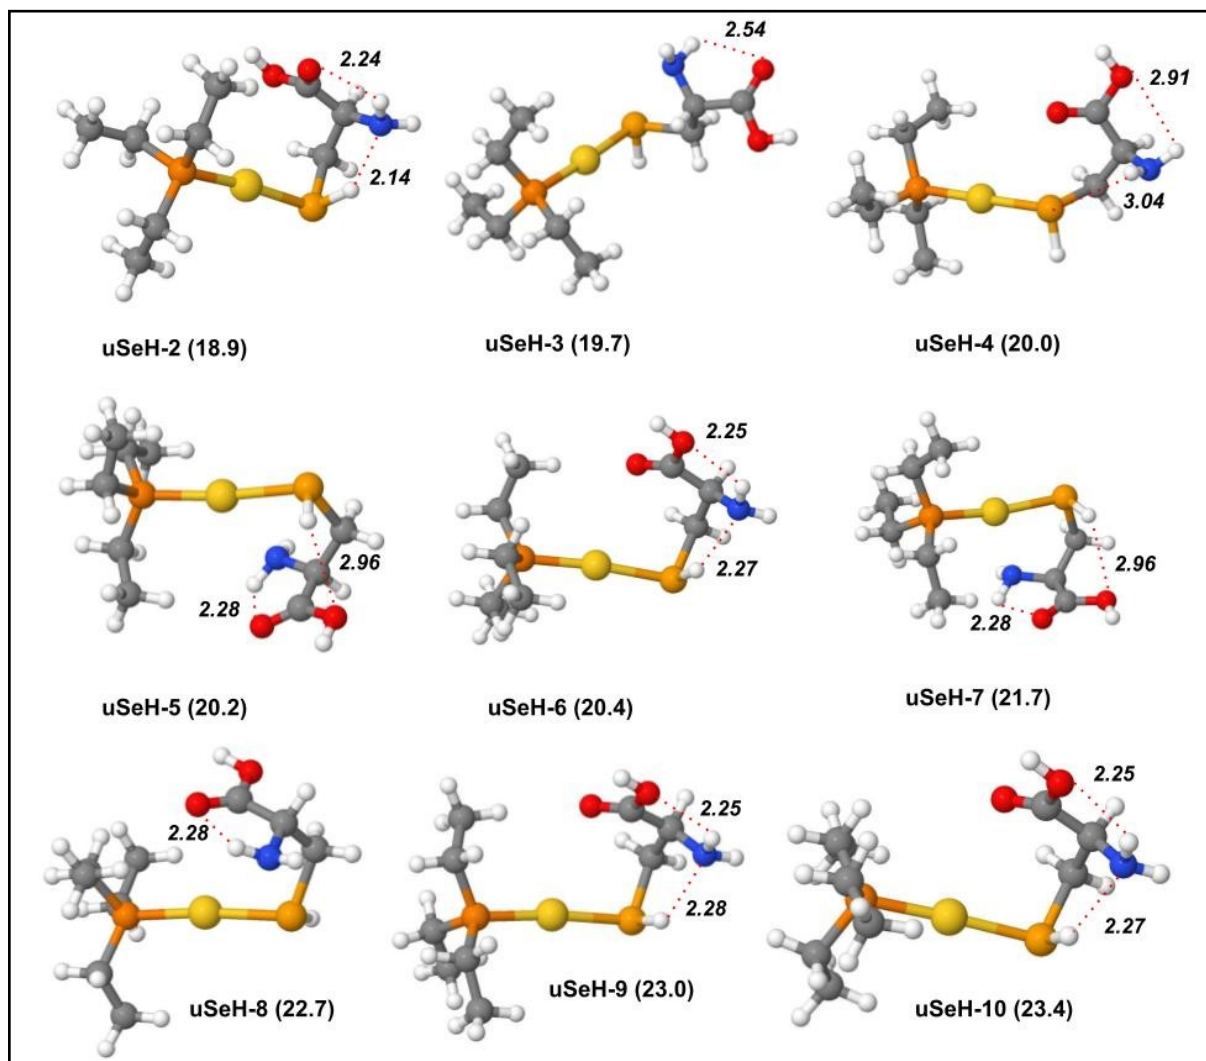

**Figure S7:** Optimized geometries of the most stable **uSeH** conformers of the  $[(Et_3P)AuSec]^+$  ion, computed in gas phase at B3LYP/BS1 level of theory. Free energy values relative to **uSe-1** are reported in parenthesis in  $\text{kJ mol}^{-1}$ . Hydrogen bond distances ( $\text{\AA}$ ) are indicated by red dotted lines.

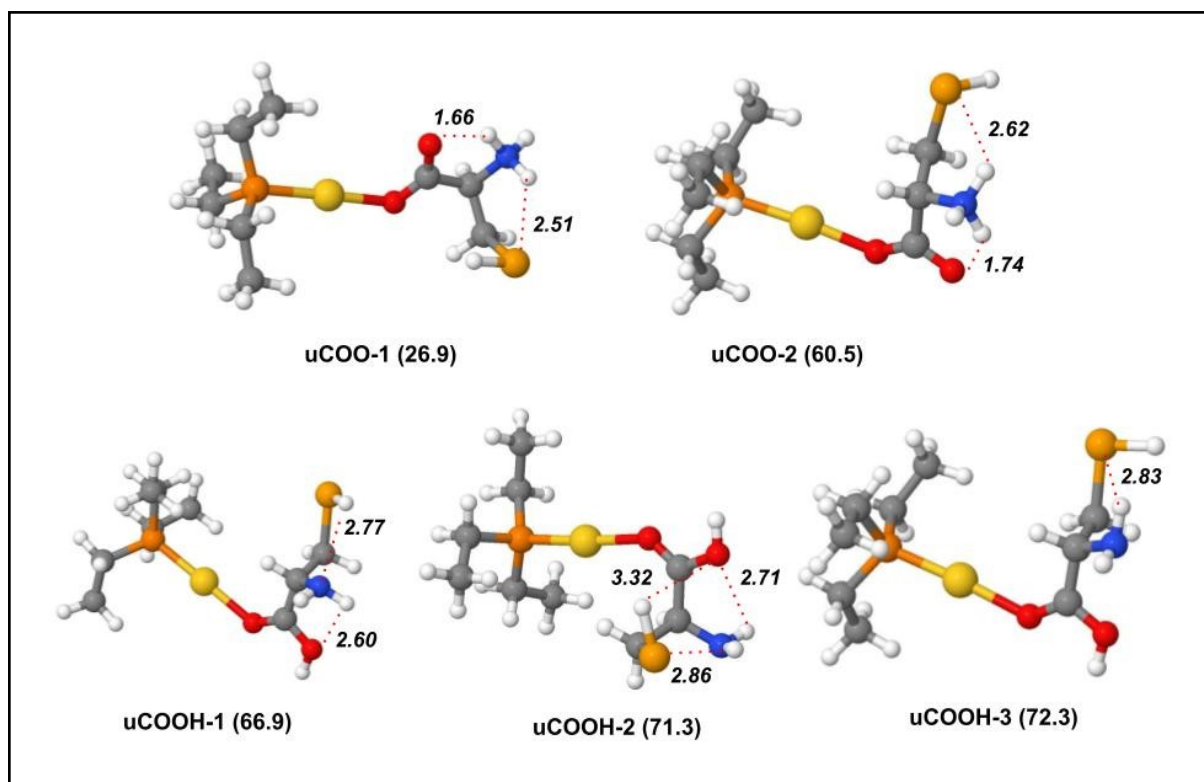

**Figure S8:** Optimized geometries of the most stable conformers of **uCOO** and **uCOOH** isomers for the  $[(Et_3P)AuSec]^+$  ion, computed in gas phase at B3LYP/BS1 level of theory. Free energy values relative to **uSe-1** are reported in parenthesis in  $\text{kJ mol}^{-1}$ . 5 Hydrogen bond distances ( $\text{\AA}$ ) are indicated by red dotted lines.

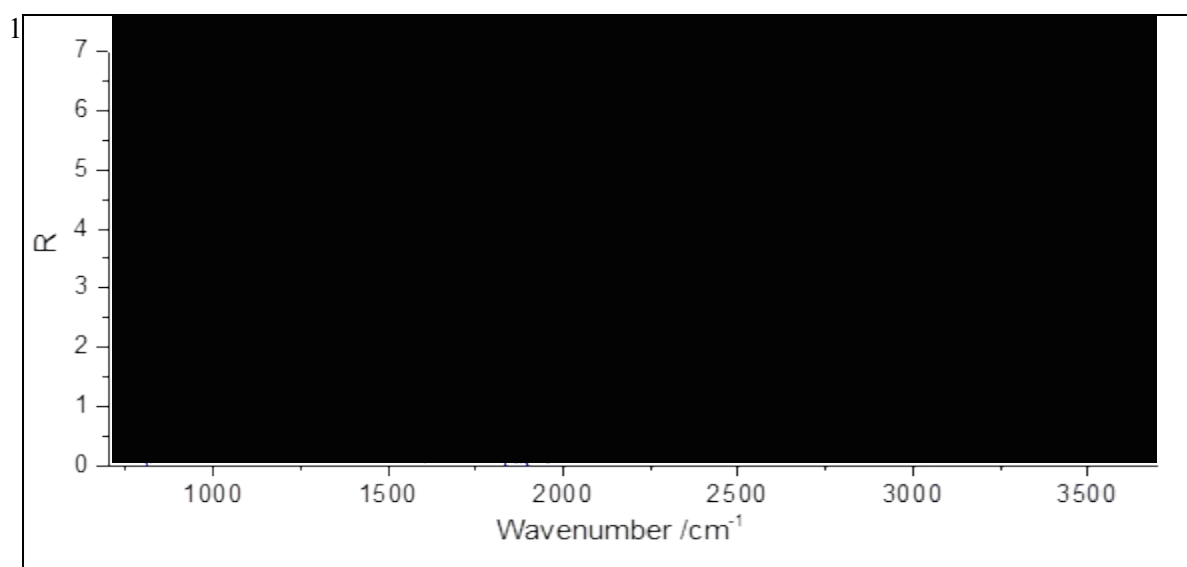

**Figure S9:** IRMPD spectrum of  $[(Et_3P)AuSec]^+$ .

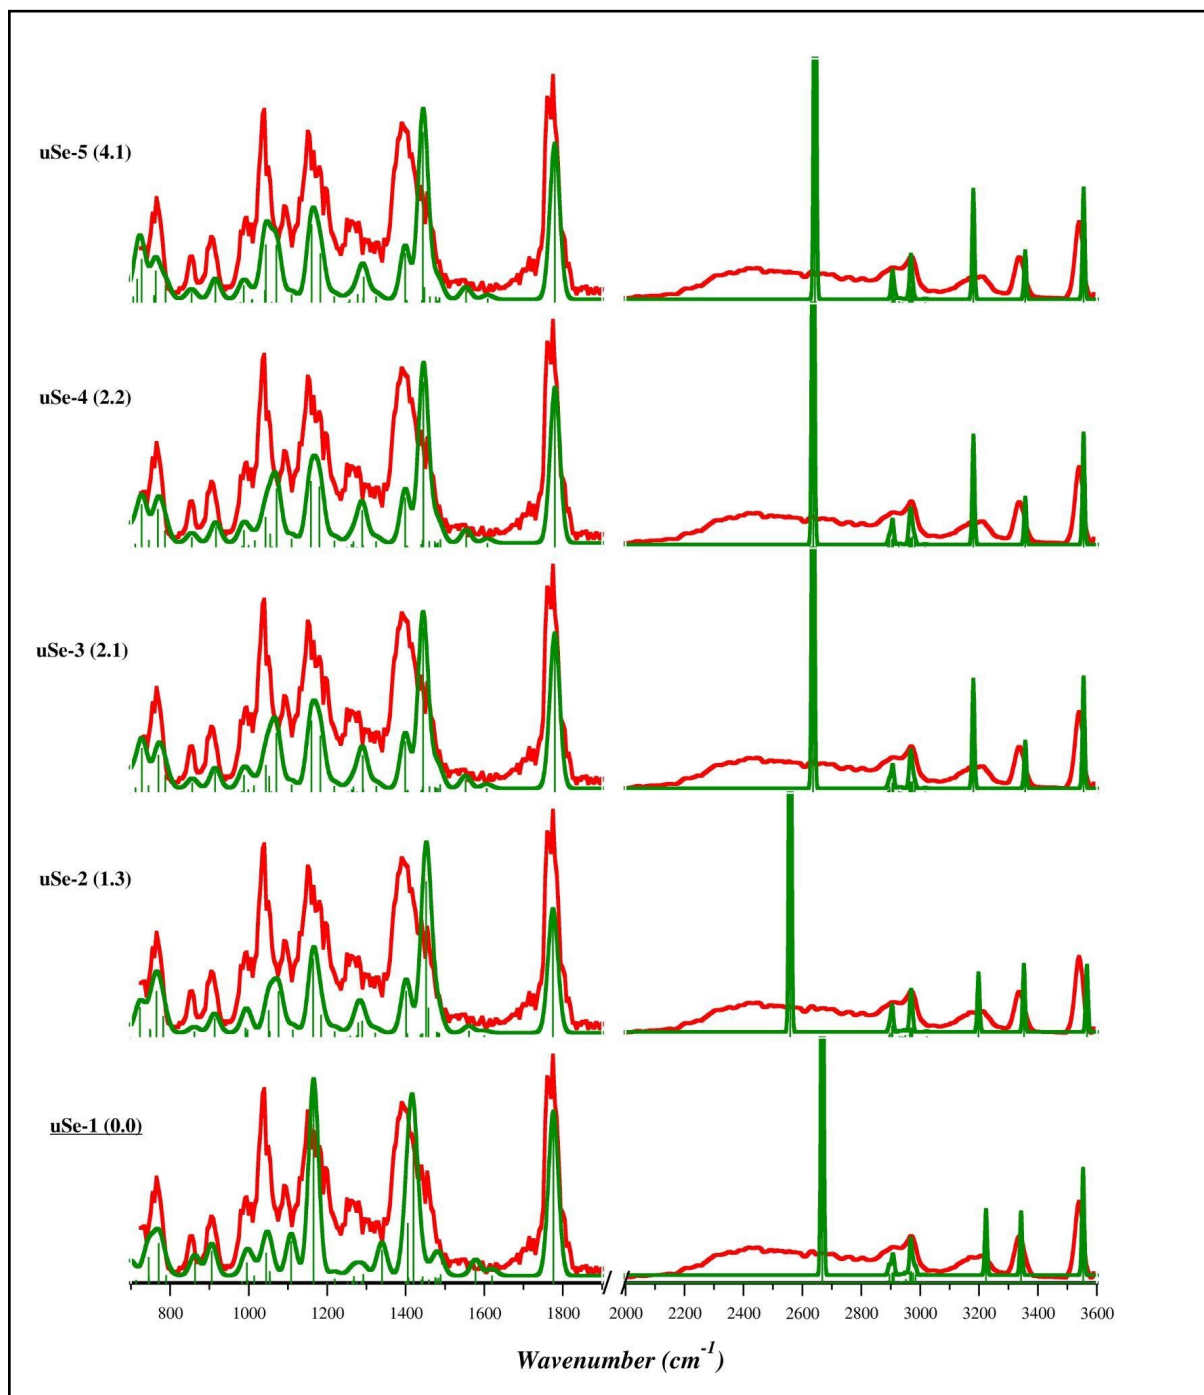

**Figure S10:** IRMPD spectrum (red profile) of  $[(\text{Et}_3\text{P})\text{AuSeC}]^+$  ion and calculated harmonic IR spectra (green profiles) of the lowest lying conformers of **uSe** isomer, computed at the B3LYP/BS1 level of theory. Free energies relative to **uSe-1** are reported in brackets ( $\text{kJ mol}^{-1}$ ). Harmonic frequencies computed in the 900–1900 and 2000–3600  $\text{cm}^{-1}$  ranges were scaled by 0.985 and 0.955, respectively.

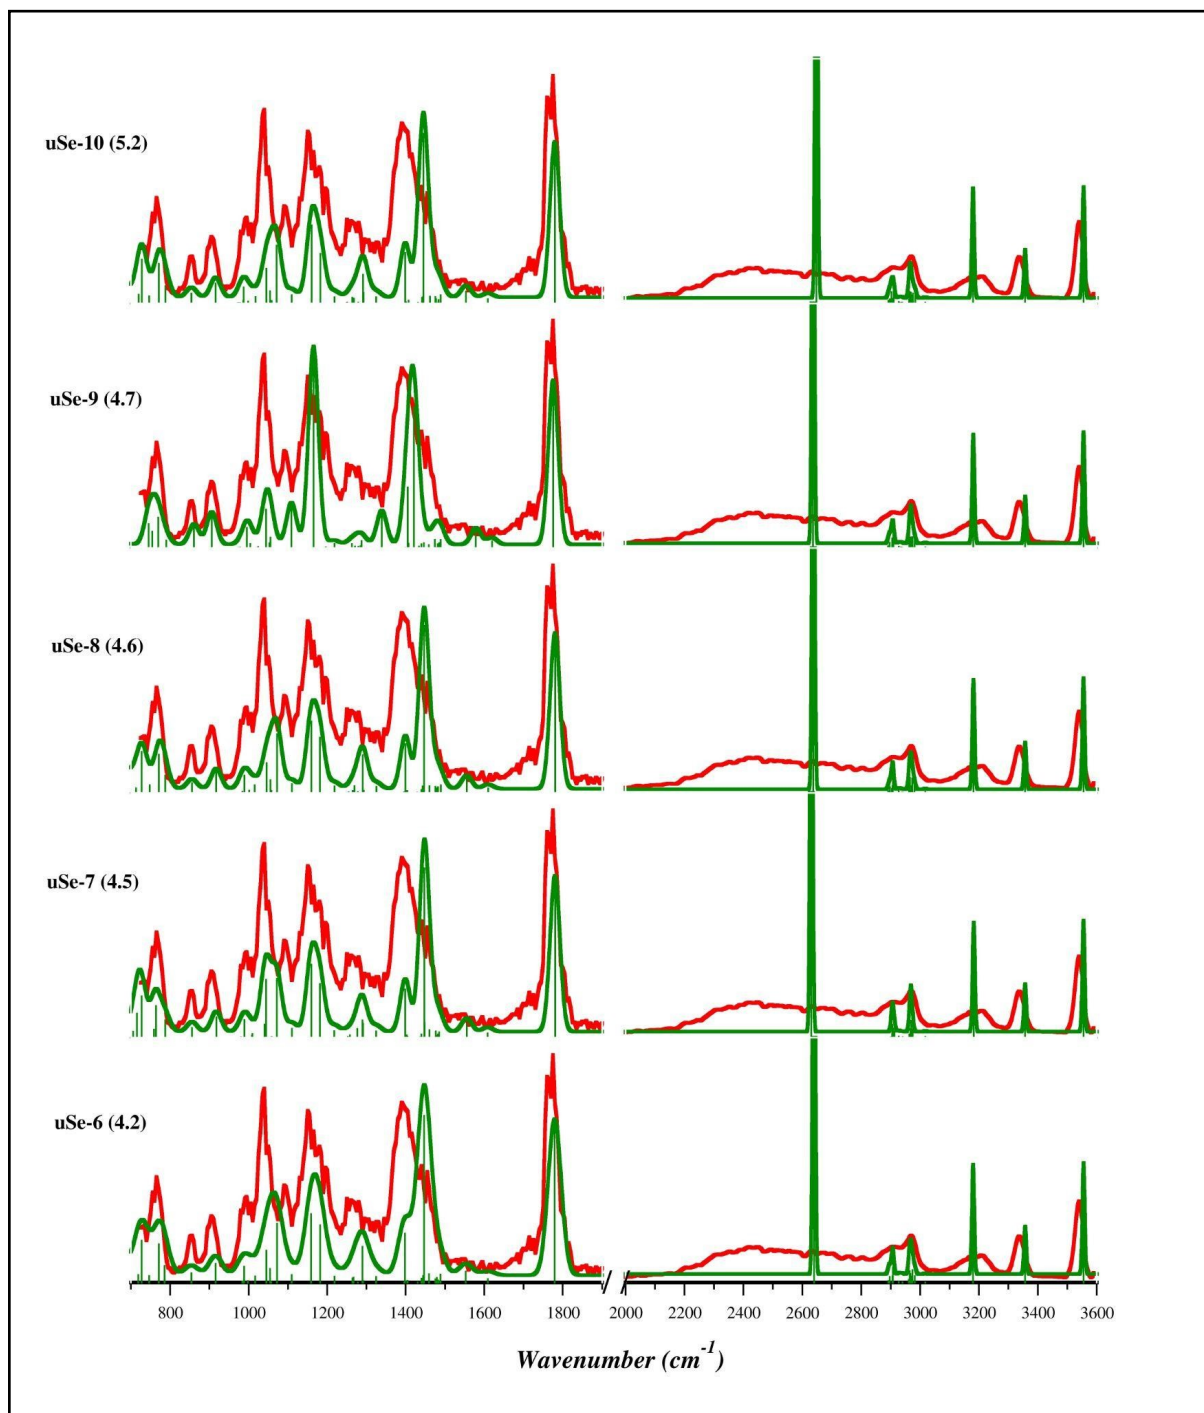

**Figure S11:** IRMPD spectrum (red profile) of  $[(\text{Et}_3\text{P})\text{AuSec}]^+$  ion and calculated harmonic IR spectra (green profiles) of the lowest lying conformers of **uSe** isomer, computed at the B3LYP/BS1 level of theory. Free energies relative to **uSe-1** are reported in brackets ( $\text{kJ mol}^{-1}$ ). Harmonic frequencies computed in the 900–1900 and 2000–3600  $\text{cm}^{-1}$  ranges were scaled by 0.985 and 0.955, respectively.

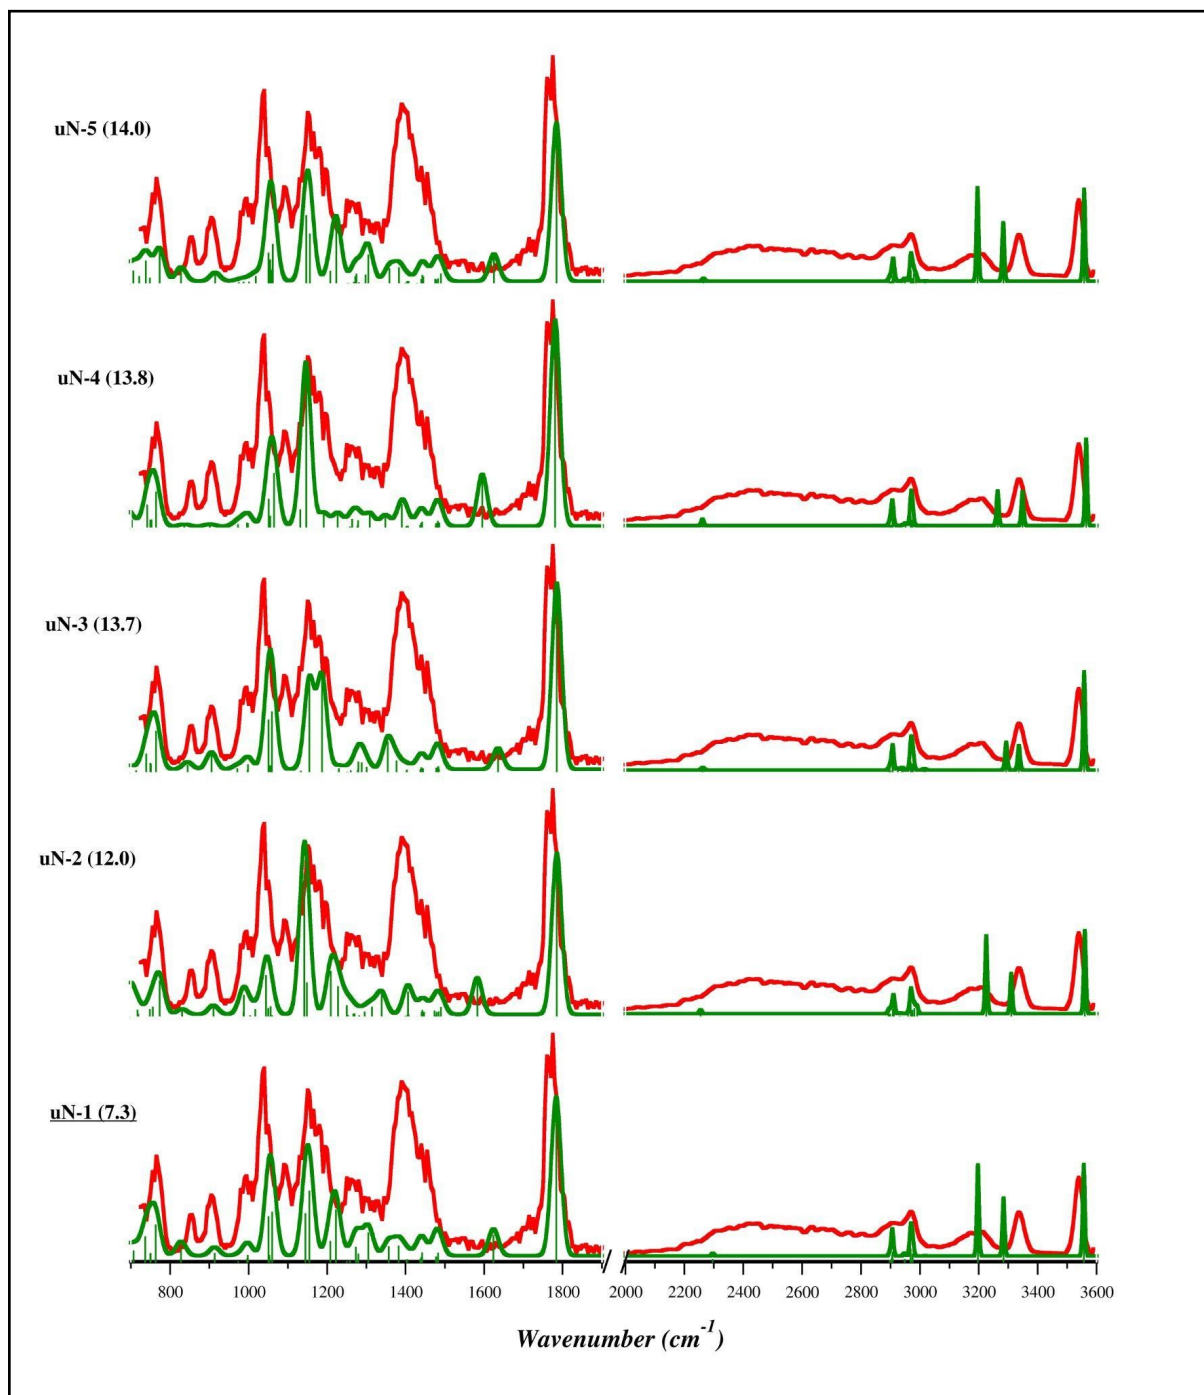

**Figure S12:** IRMPD spectrum (red profile) of  $[(\text{Et}_3\text{P})\text{AuSec}]^+$  ion and calculated harmonic IR spectra (green profiles) of the lowest lying conformers of **uN** isomer, computed at the B3LYP/BS1 level of theory. Free energies relative to **uSe-1** are reported in brackets ( $\text{kJ mol}^{-1}$ ). Harmonic frequencies computed in the 900–1900 and 2000–3600  $\text{cm}^{-1}$  ranges were scaled by 0.985 and 0.955, respectively.

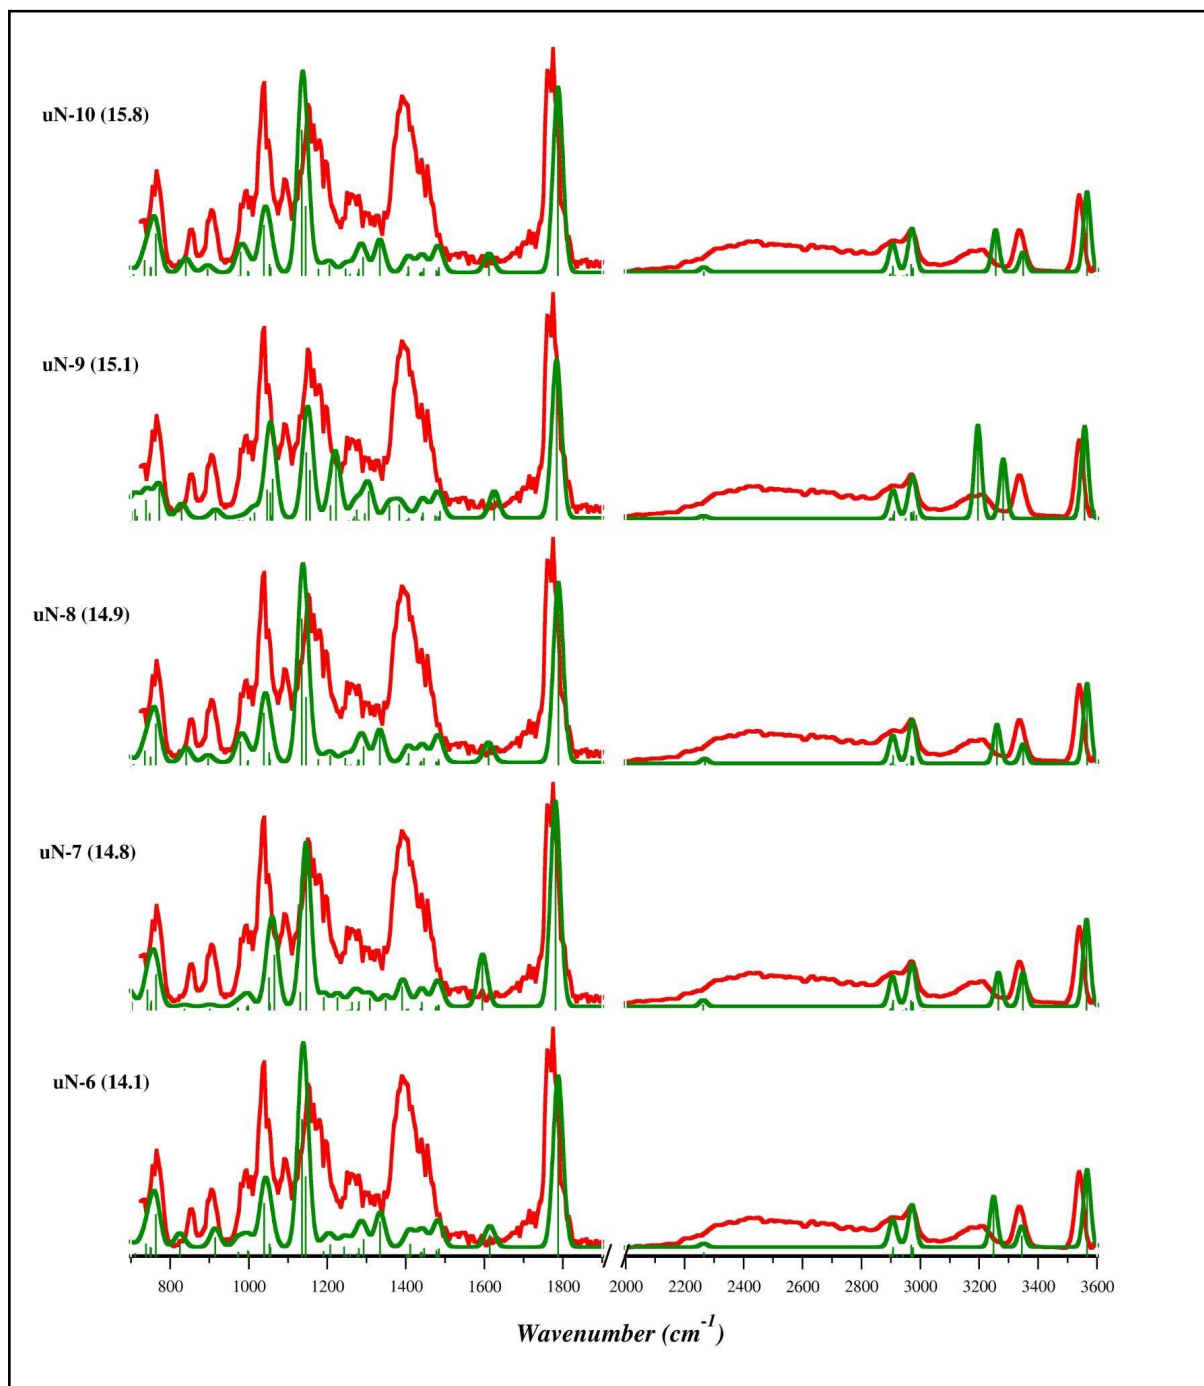

**Figure S13:** IRMPD spectrum (red profile) of  $[(\text{Et}_3\text{P})\text{AuSec}]^+$  ion and calculated harmonic IR spectra (green profiles) of the lowest lying conformers of **uN** isomer, computed at the B3LYP/BS1 level of theory. Free energies relative to **uSe-1** are reported in brackets ( $\text{kJ mol}^{-1}$ ). Harmonic frequencies computed in the 900–1900 and 2000–3600  $\text{cm}^{-1}$  ranges were scaled by 0.985 and 0.955, respectively.



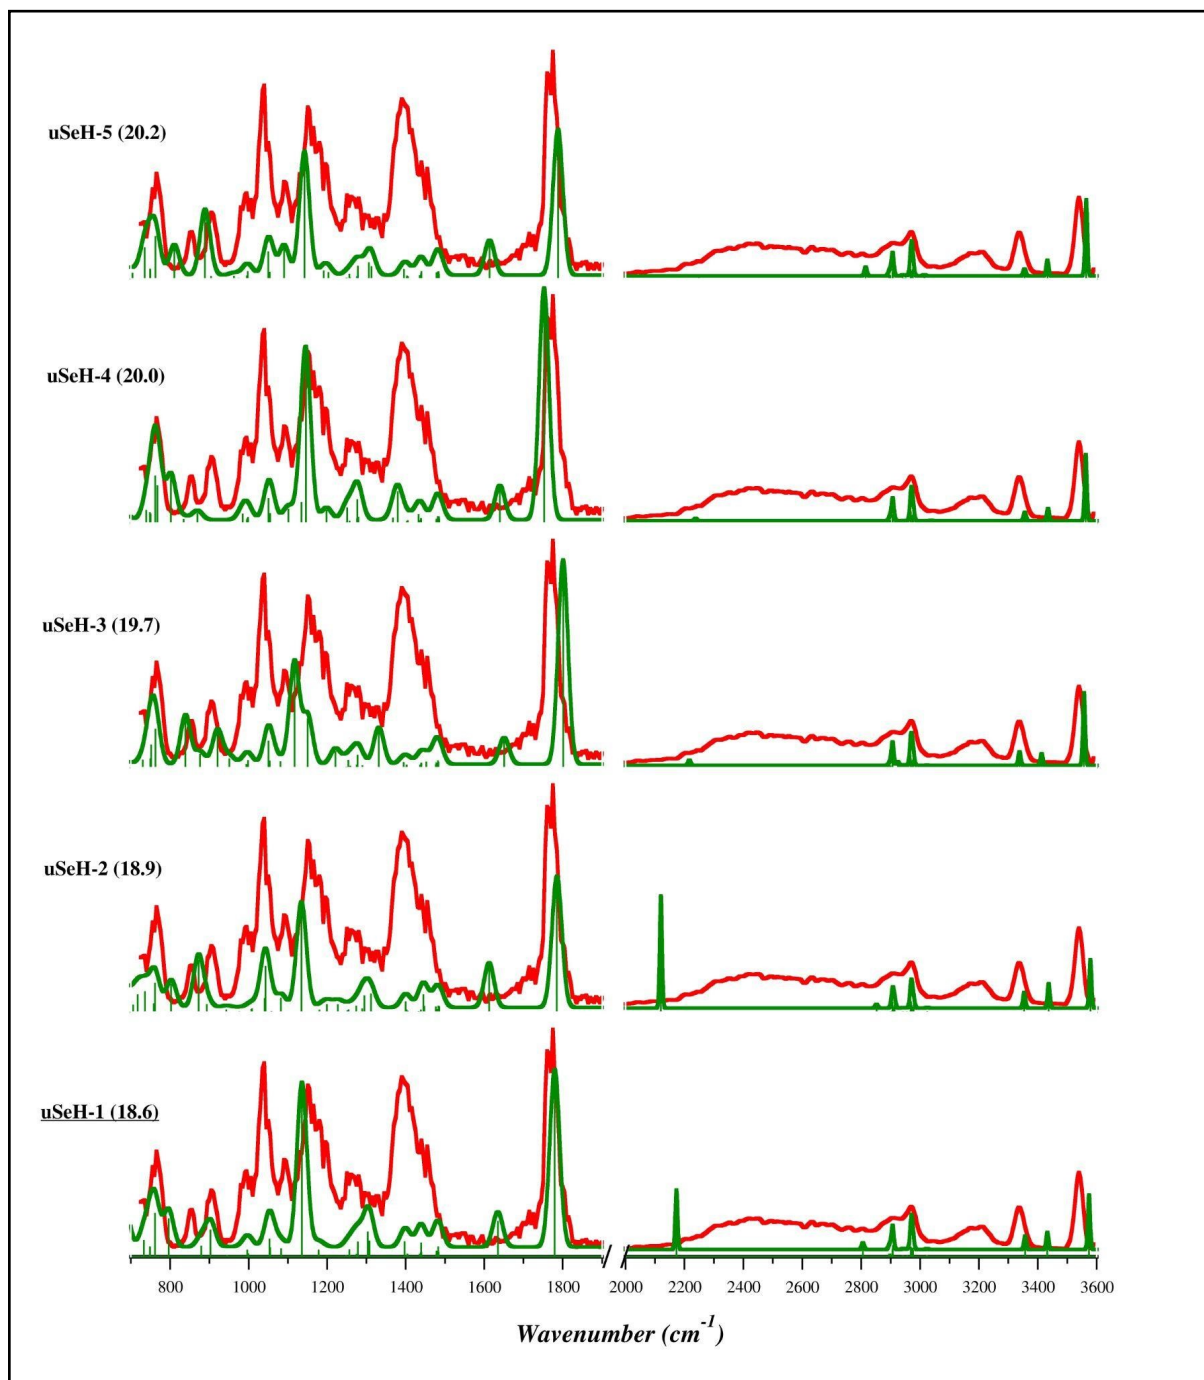

**Figure S14:** IRMPD spectrum (red profile) of  $[(\text{Et}_3\text{P})\text{AuSec}]^+$  ion and calculated harmonic IR spectra (green profiles) of the lowest lying conformers of **uSeH** isomer, computed at the B3LYP/BS1 level of theory. Free energies relative to **uSe-1** are reported in brackets ( $\text{kJ mol}^{-1}$ ). Harmonic frequencies computed in the 900–1900 and 2000–39600  $\text{cm}^{-1}$  ranges were scaled by 0.985 and 0.955, respectively.

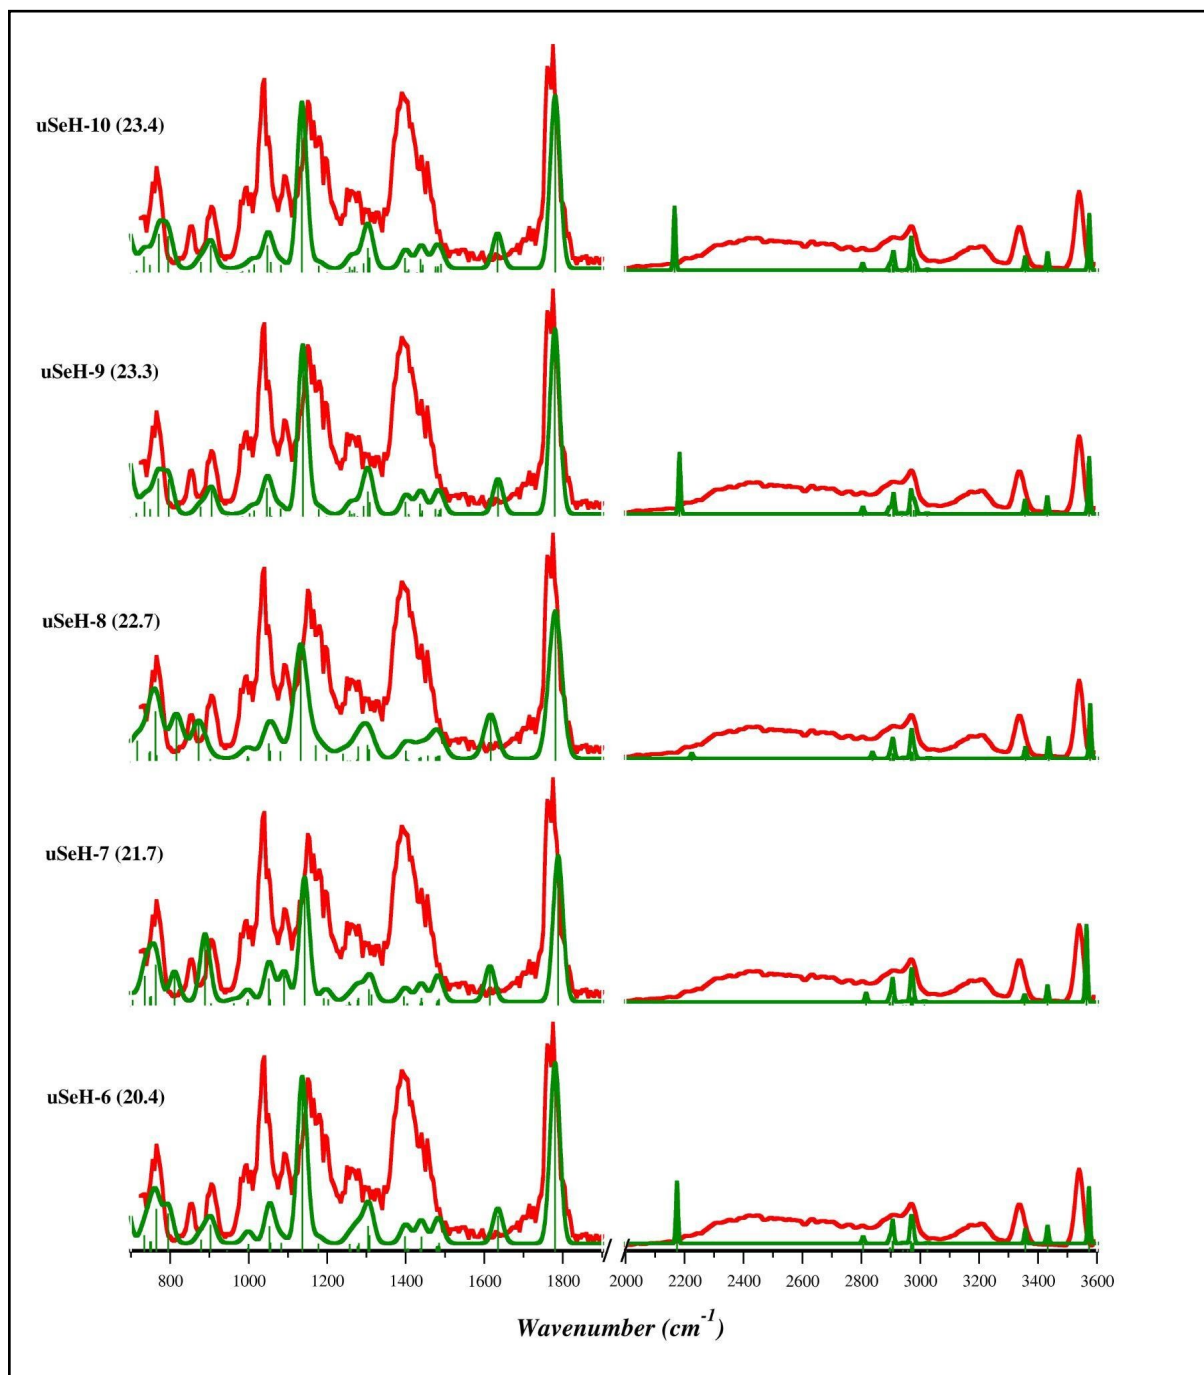

**Figure S15:** IRMPD spectrum (red profile) of  $[(\text{Et}_3\text{P})\text{AuSec}]^+$  ion and calculated harmonic IR spectra (green profiles) of the lowest lying conformers of **uSeH** isomer, computed at the B3LYP/BS1 level of theory. Free energies relative to **uSe-1** are reported in brackets ( $\text{kJ mol}^{-1}$ ). Harmonic frequencies computed in the 900–1900 and 2000–3600  $\text{cm}^{-1}$  ranges were scaled by 0.985 and 0.955, respectively.

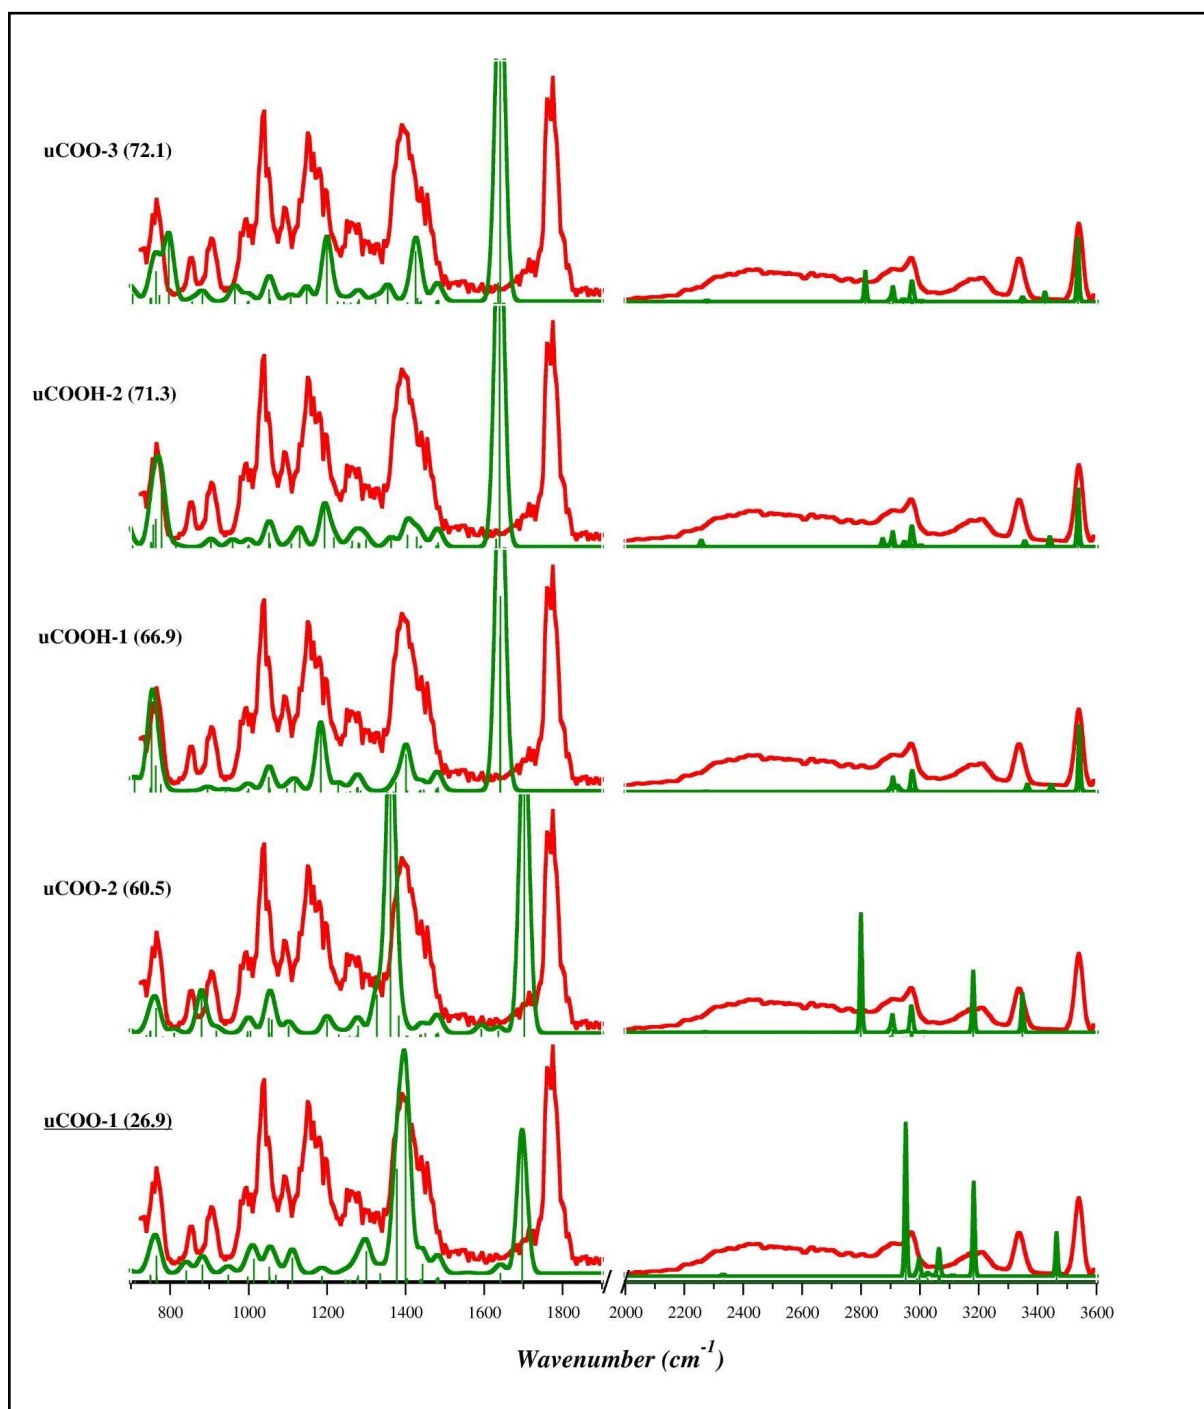

**Figure S16:** IRMPD spectrum (red profile) of  $[(\text{Et}_3\text{P})\text{AuSec}]^+$  ion and calculated harmonic IR spectra (green profiles) of the lowest lying conformers of **uCOOH** and **uCOO** isomers, computed at the B3LYP/BS1 level of theory. Free energies relative to **uSe-1** are reported in brackets ( $\text{kJ mol}^{-1}$ ). Harmonic frequencies computed in the 900–1900 and 2000–3600  $\text{cm}^{-1}$  ranges were scaled by 0.985 and 0.955, respectively.

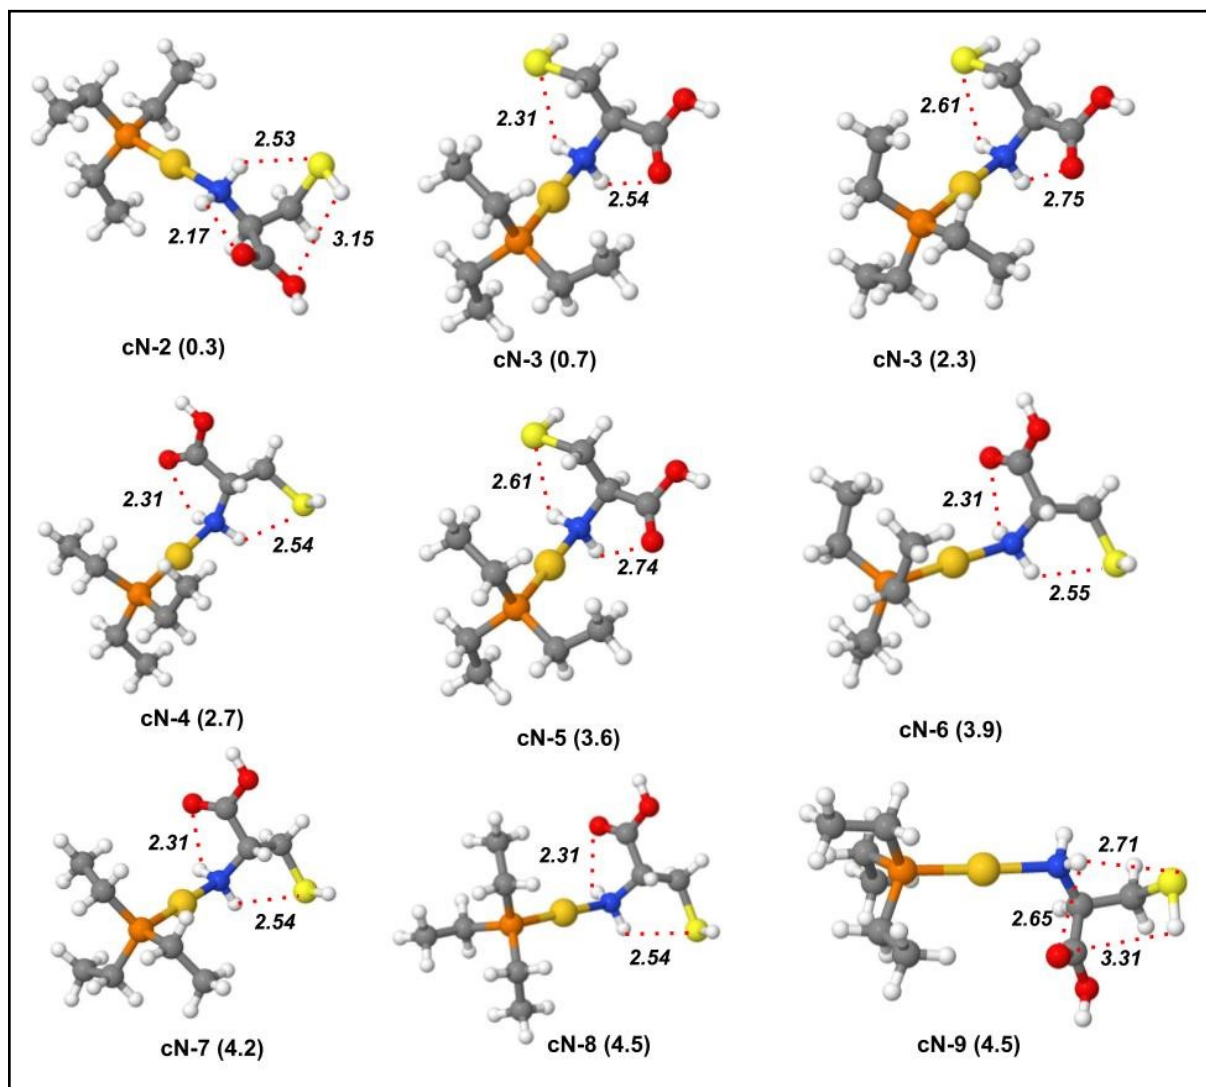

**Figure S17:** Optimized geometries of the most stable cN conformers of the  $[(\text{Et}_3\text{P})\text{AuCys}]^+$  ion, computed in gas phase at B3LYP/BS1 level of theory. Free energy values relative to cN-1 are reported in parenthesis in  $\text{kJ mol}^{-1}$ . Hydrogen bond distances ( $\text{\AA}$ ) are indicated by red dotted lines.

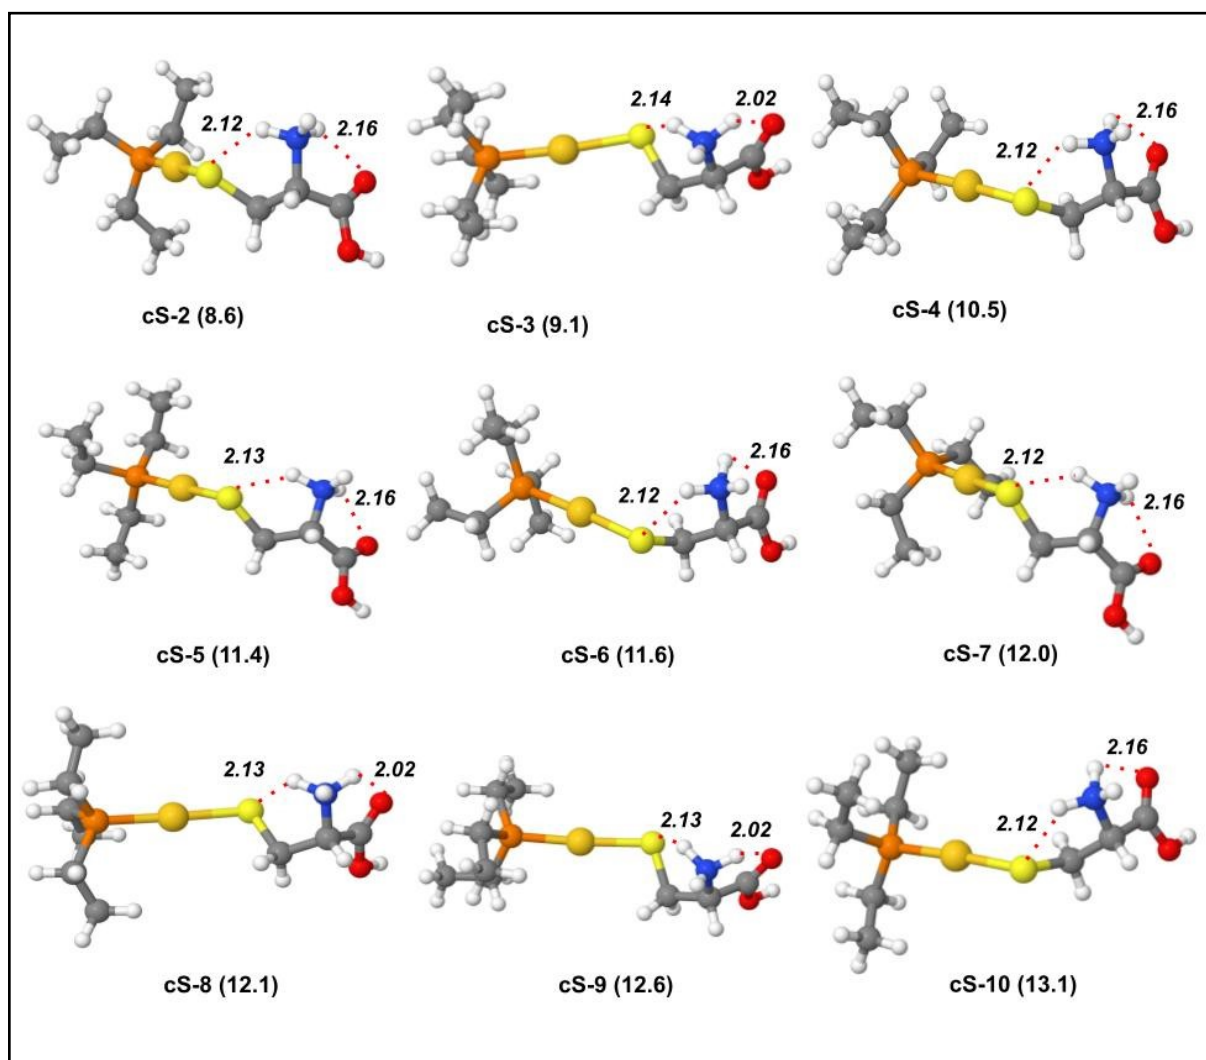

**Figure S18:** Optimized geometries of the most stable **cS** conformers of the  $[(\text{Et}_3\text{P})\text{AuCys}]^+$  ion, computed in gas phase at B3LYP/BS1 level of theory. Free energy values relative to **cN-1** are reported in parenthesis in  $\text{kJ mol}^{-1}$ . Hydrogen bond distances ( $\text{\AA}$ ) are indicated by red dotted lines.

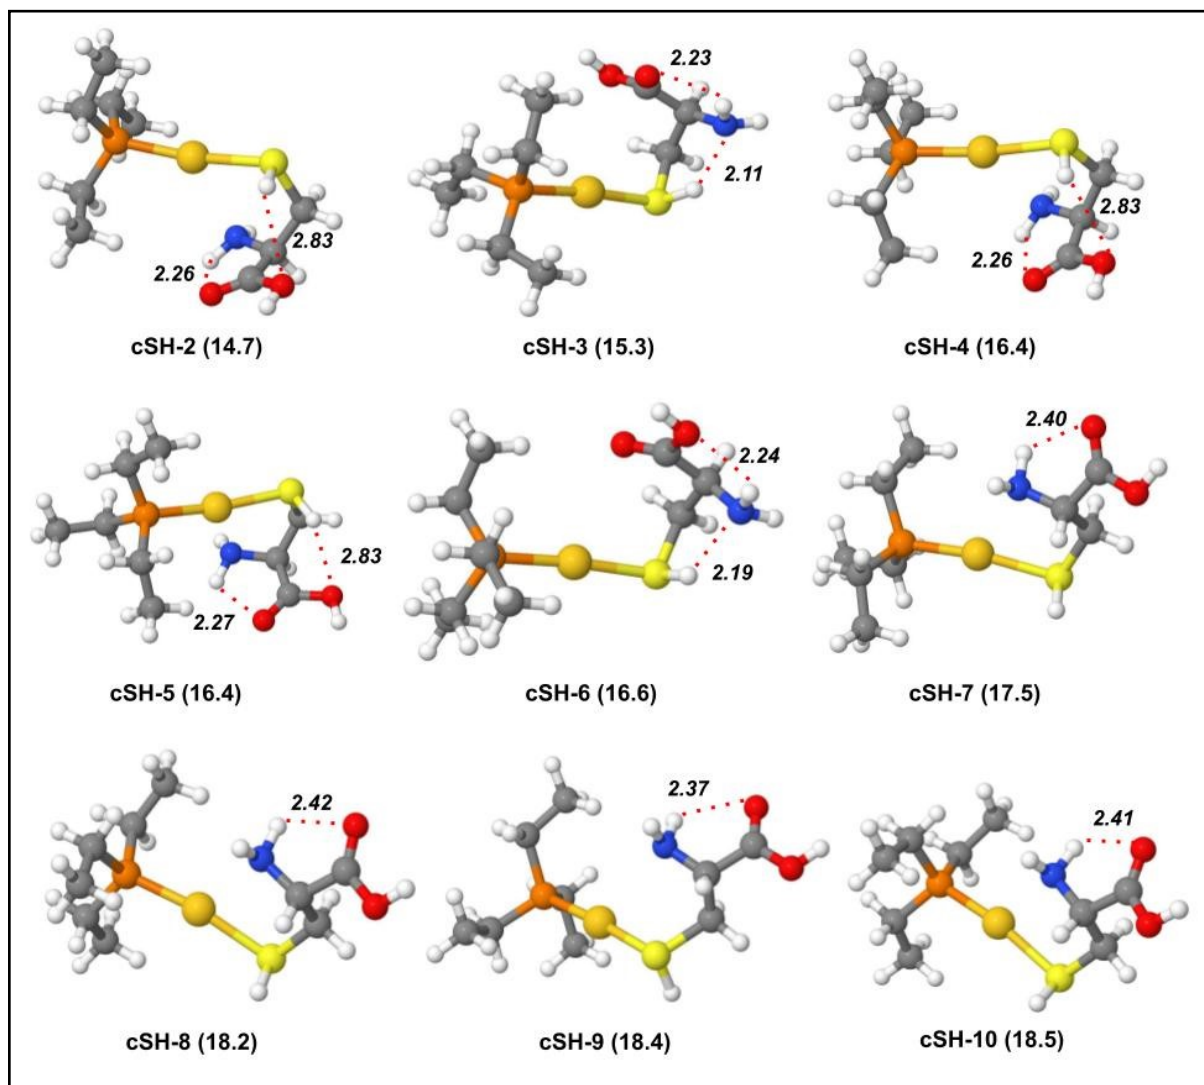

**Figure S19:** Optimized geometries of the most stable **cSH** conformers of the  $[(Et_3P)AuCys]^+$  ion, computed in gas phase at B3LYP/BS1 level of theory. Free energy values relative to **cN-1** are reported in parenthesis in  $\text{kJ mol}^{-1}$ . Hydrogen bond distances ( $\text{\AA}$ ) are indicated by red dotted lines.

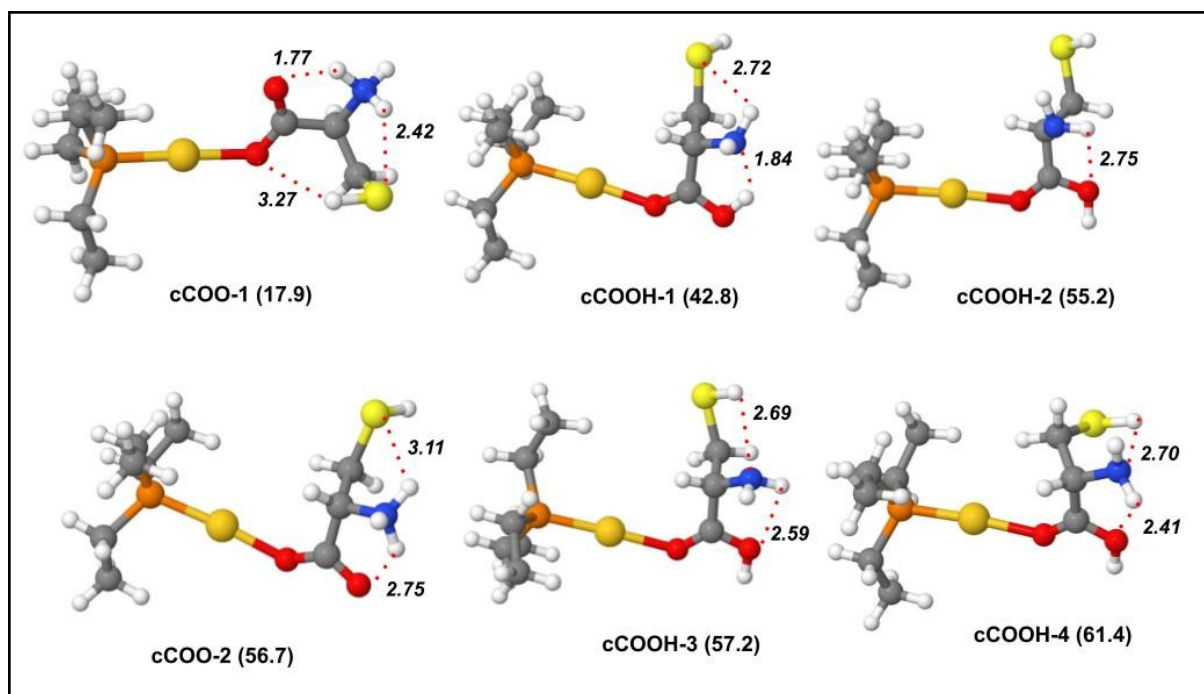

**Figure S20:** Optimized geometries of the most stable conformers of **cCOO** and **cCOOH** isomers for the  $[(Et_3P)AuCys]^+$  ion, computed in gas phase at B3LYP/BS1 level of theory. Free energy values relative to **cN-1** are reported in parenthesis in  $\text{kJ mol}^{-1}$ . Hydrogen bond distances ( $\text{\AA}$ ) are indicated by red dotted lines.

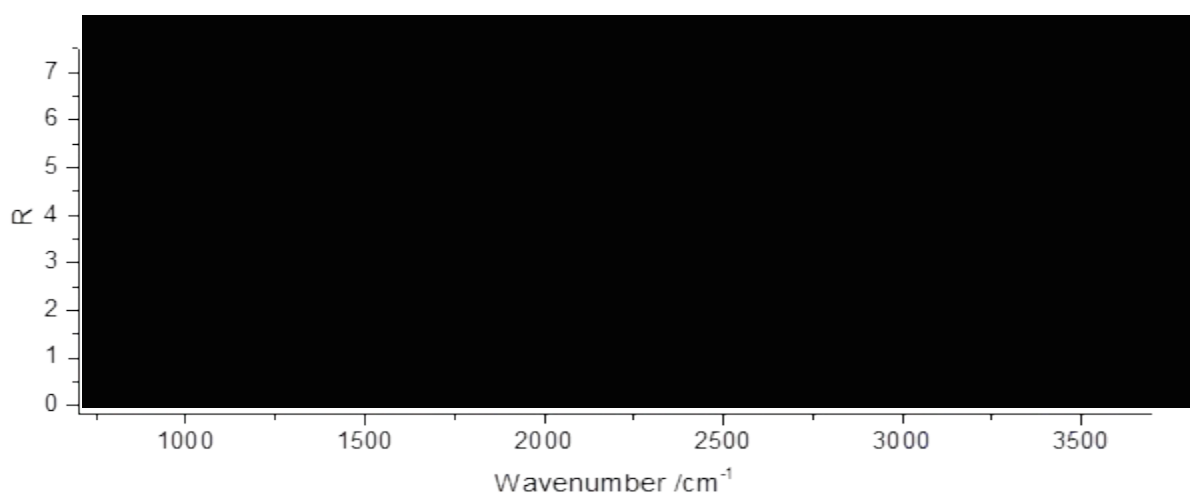

**Figure S21:** IRMPD spectrum of  $[(Et_3P)AuCys]^+$ .

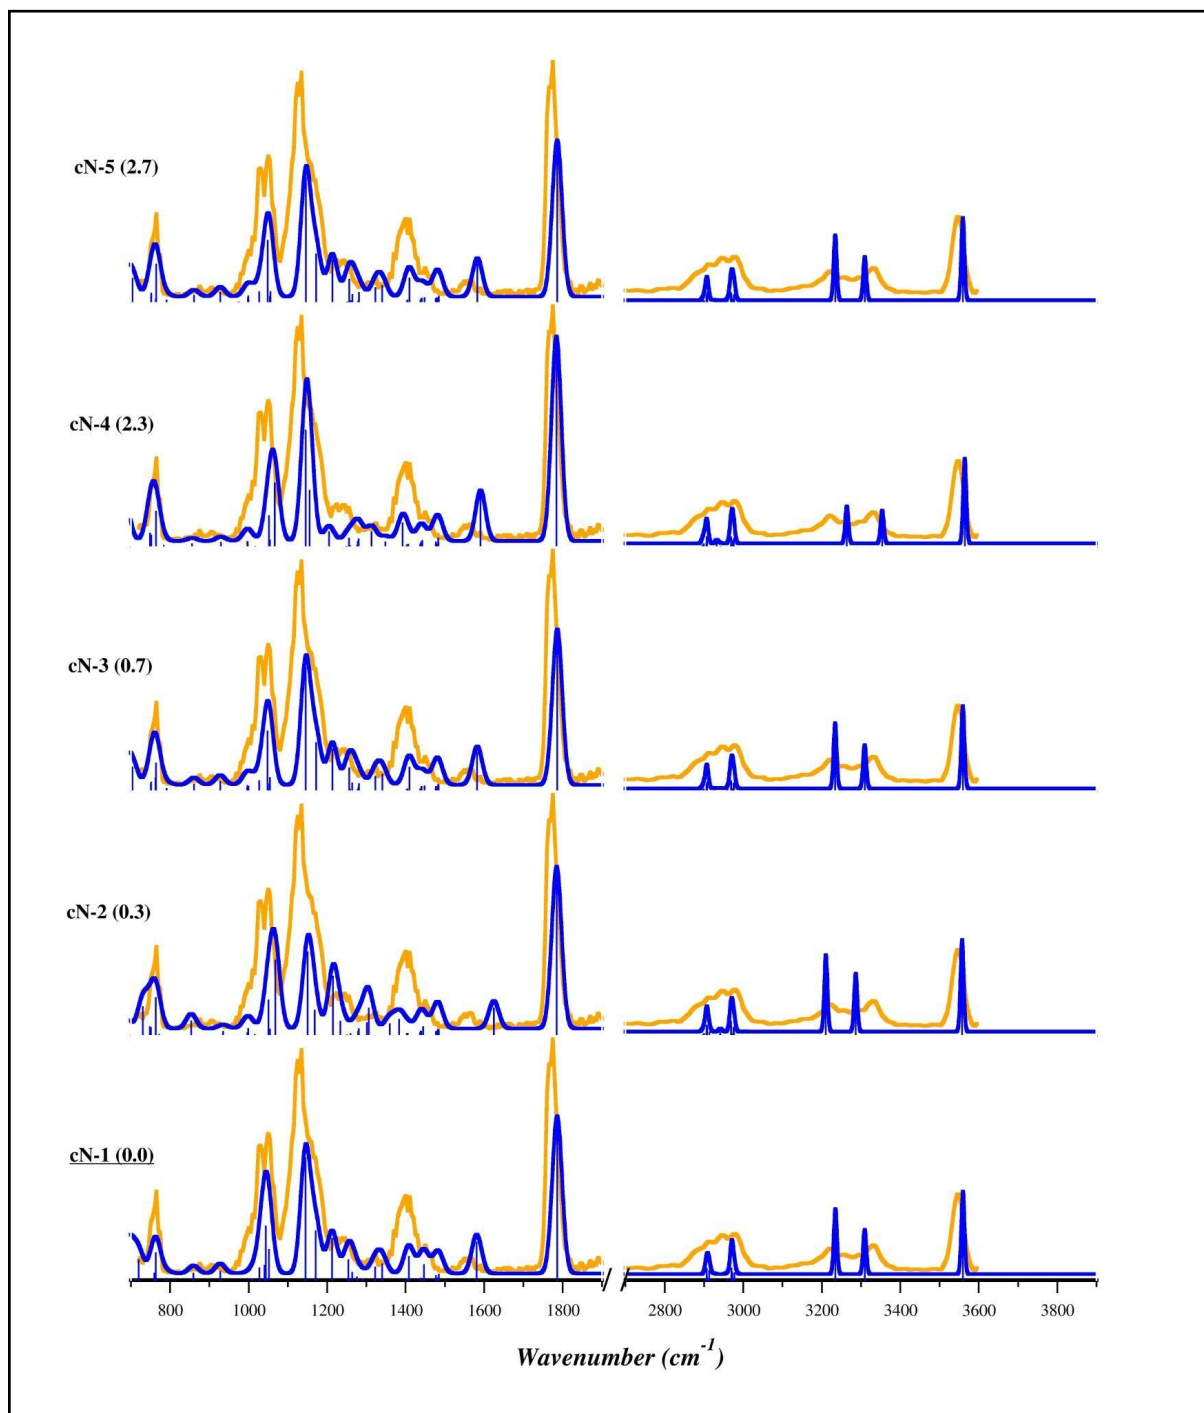

**Figure S22:** IRMPD spectrum (orange profile) of  $[(\text{Et}_3\text{P})\text{AuCys}]^+$  ion and calculated harmonic IR spectra (blue profiles) of the lowest lying conformers of cN isomer, computed at the B3LYP/BS1 level of theory. Free energies relative to cN-1 are reported in brackets ( $\text{kJ mol}^{-1}$ ). Harmonic frequencies computed in the 900–1900 and 2700–3900  $\text{cm}^{-1}$  ranges were scaled by 0.985 and 0.955, respectively.



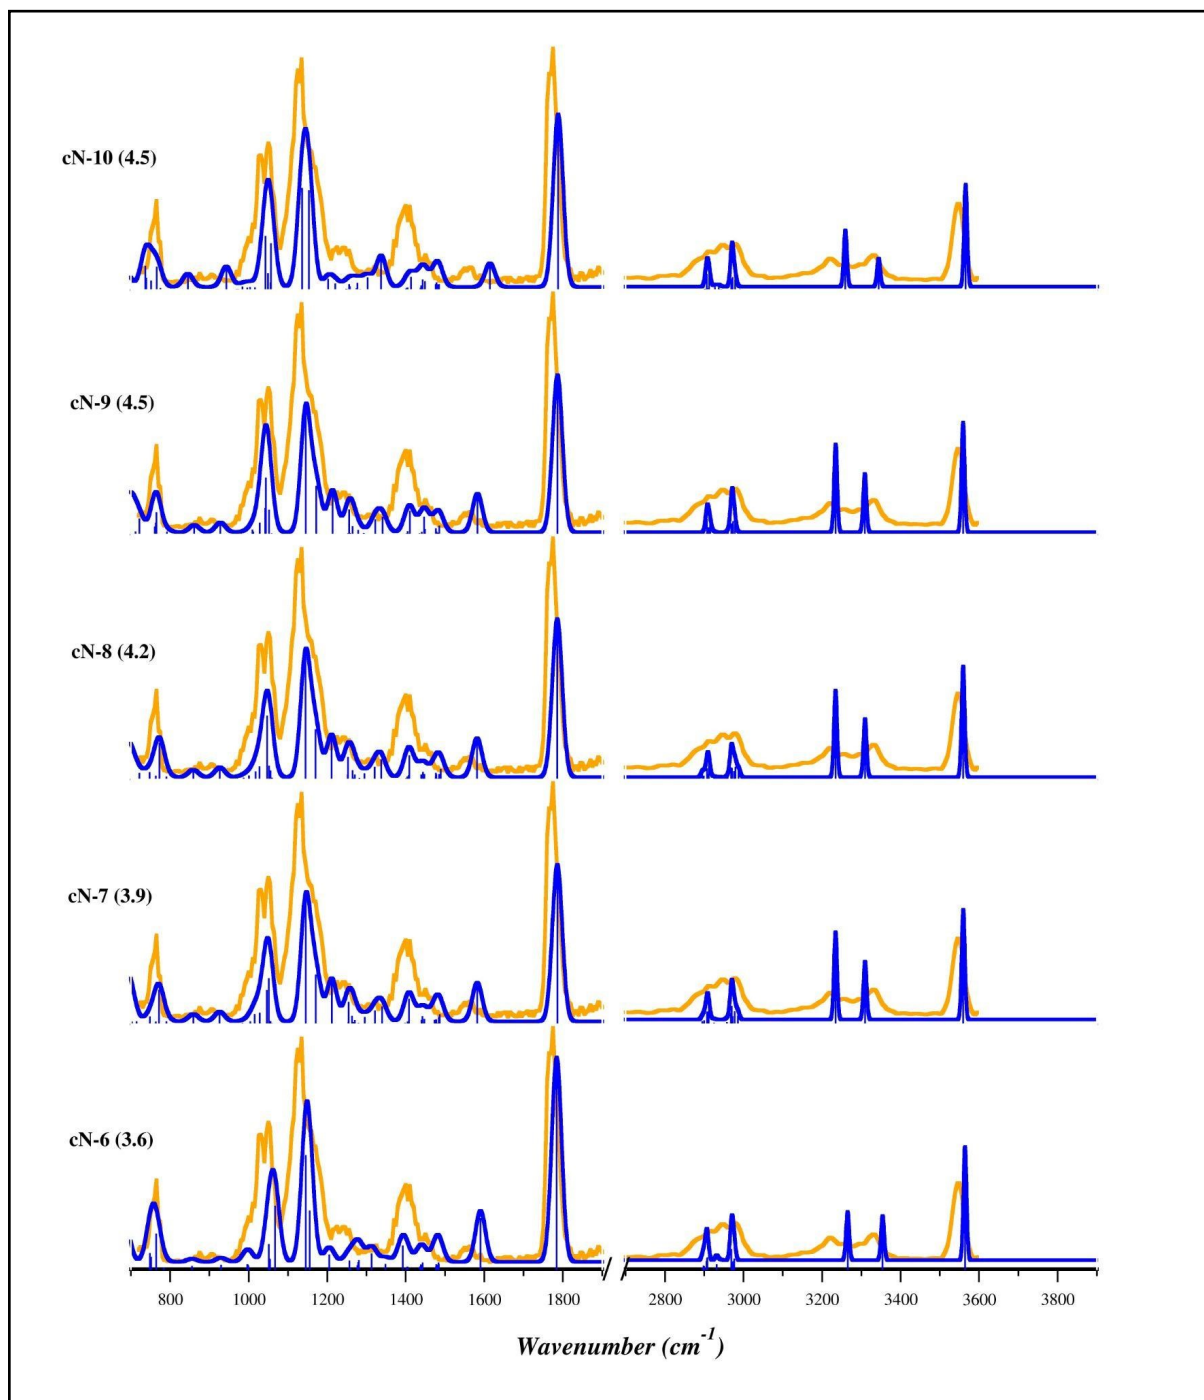

**Figure S23:** IRMPD spectrum (orange profile) of  $[(\text{Et}_3\text{P})\text{AuCys}]^+$  ion and calculated harmonic IR spectra (blue profiles) of the lowest lying conformers of cN isomer, computed at the B3LYP/BS1 level of theory. Free energies relative to cN-1 are reported in brackets ( $\text{kJ mol}^{-1}$ ). Harmonic frequencies computed in the 900–1900 and 2700–3900  $\text{cm}^{-1}$  ranges were scaled by 0.985 and 0.955, respectively.

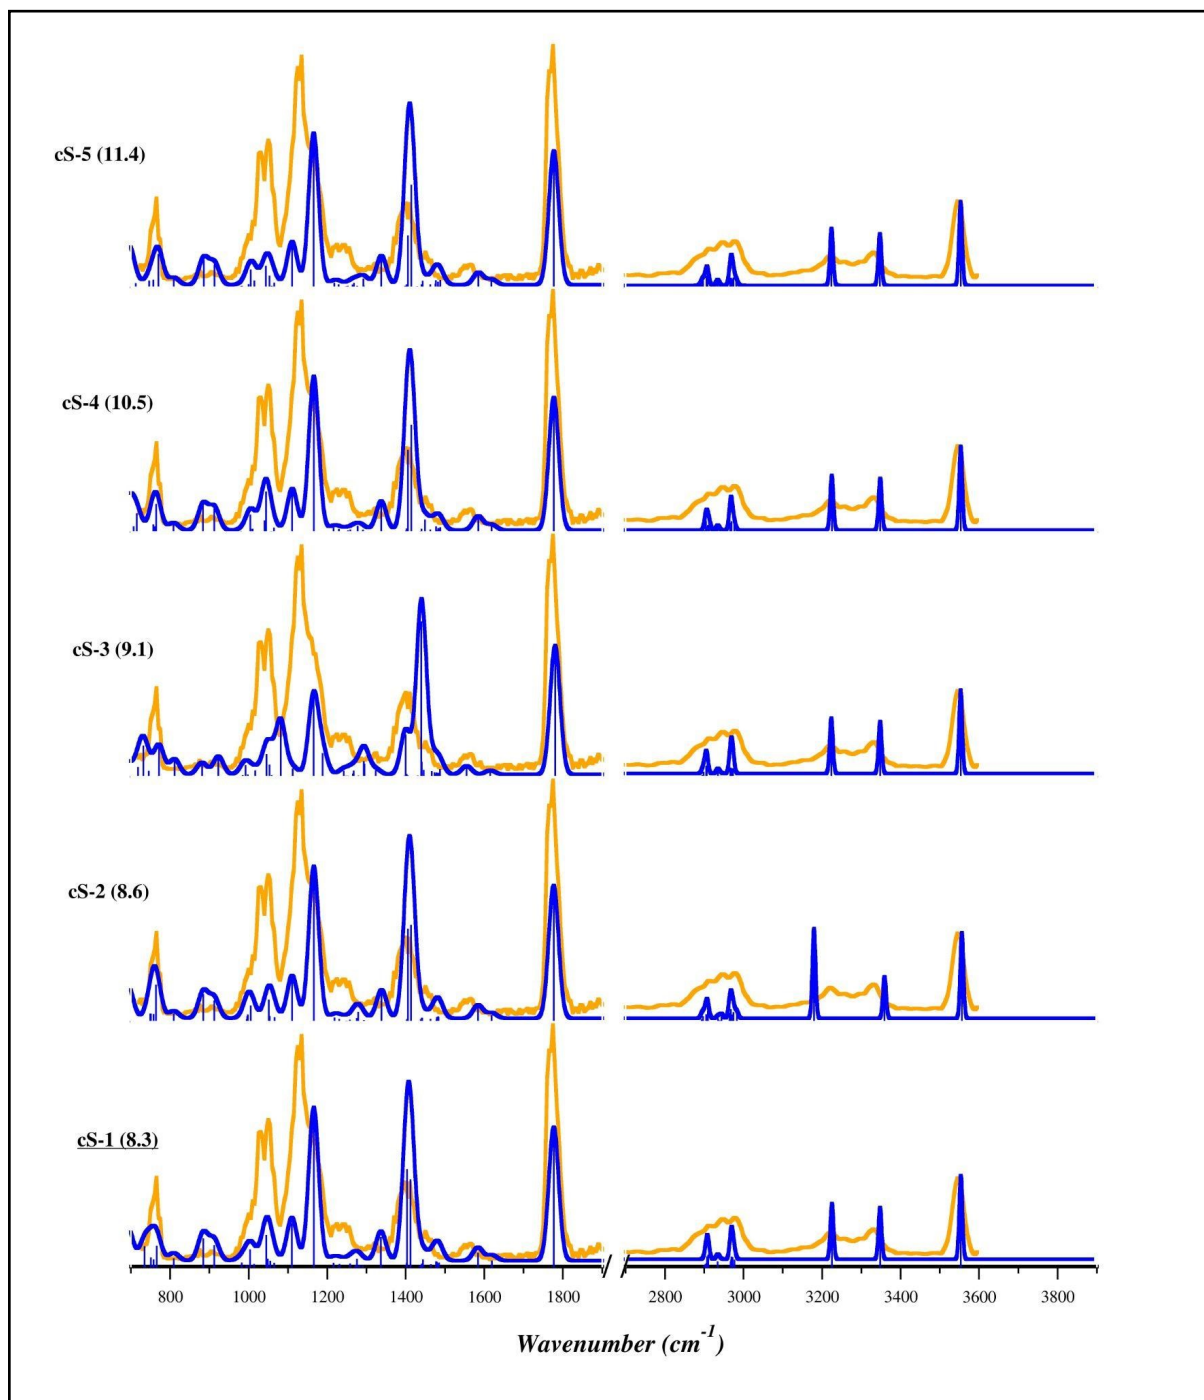

**Figure S24:** IRMPD spectrum (orange profile) of  $[(\text{Et}_3\text{P})\text{AuCys}]^+$  ion and calculated harmonic IR spectra (blue profiles) of the lowest lying conformers of *cS* isomer, computed at the B3LYP/BS1 level of theory. Free energies relative to *cN*-1 are reported in brackets (kJ mol<sup>-1</sup>). Harmonic frequencies computed in the 900–1900 and 2700–3900 cm<sup>-1</sup> ranges were scaled by 0.985 and 0.955, respectively.

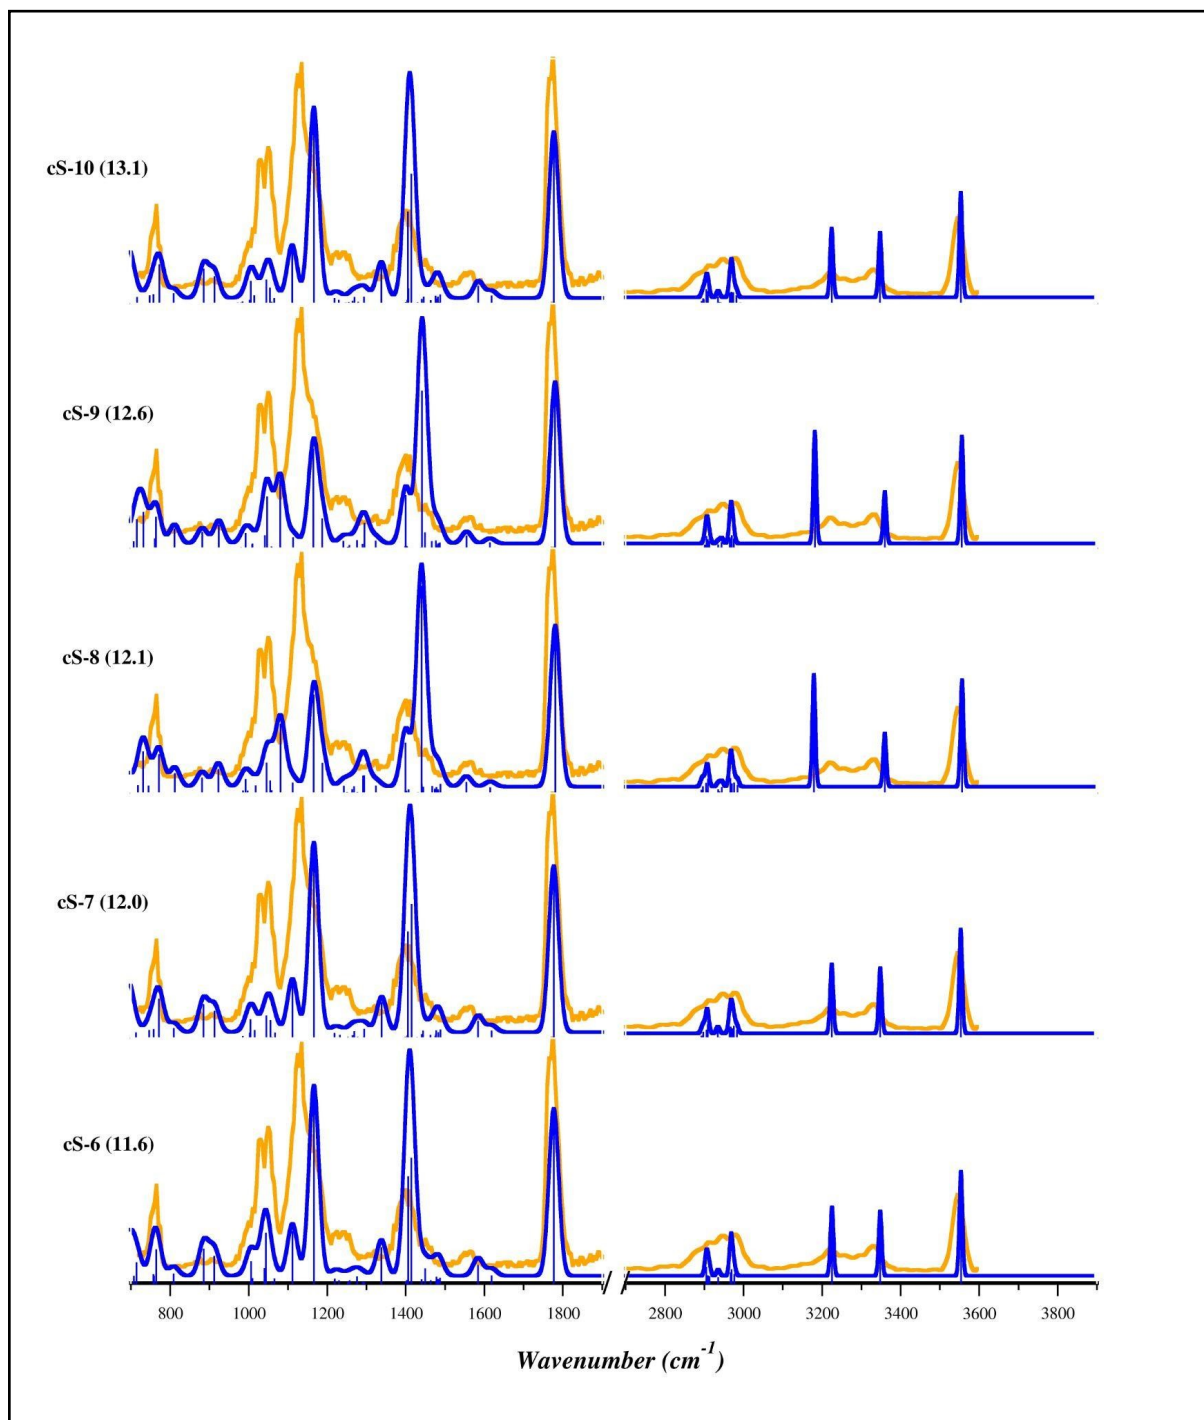

**Figure S25:** IRMPD spectrum (orange profile) of  $[(\text{Et}_3\text{P})\text{AuCys}]^+$  ion and calculated harmonic IR spectra (blue profiles) of the lowest lying conformers of **cS** isomer, computed at the B3LYP/BS1 level of theory. Free energies relative to **cN-1** are reported in brackets ( $\text{kJ mol}^{-1}$ ). Harmonic frequencies computed in the 900–1900 and 2700–3900  $\text{cm}^{-1}$  ranges were scaled by 0.985 and 0.955, respectively.

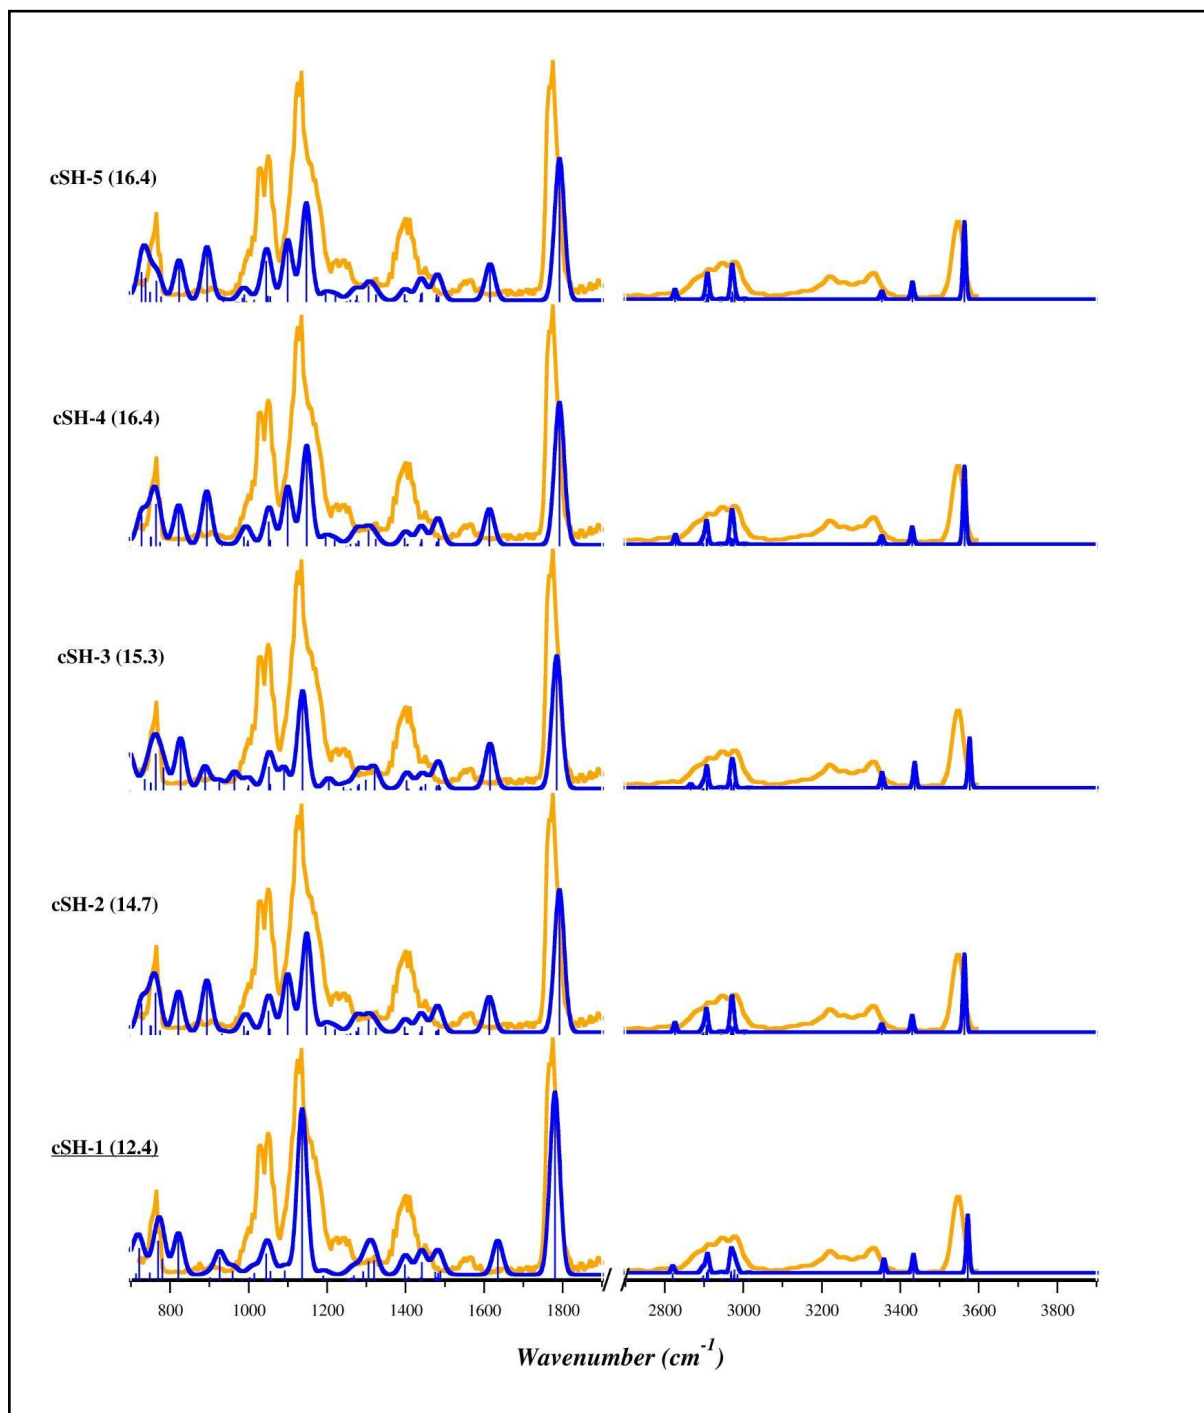

**Figure S26:** IRMPD spectrum (orange profile) of  $[(\text{Et}_3\text{P})\text{AuCys}]^+$  ion and calculated harmonic IR spectra (blue profiles) of the lowest lying conformers of **cSH** isomer, computed at the B3LYP/BS1 level of theory. Free energies relative to **cN-1** are reported in brackets (kJ mol<sup>-1</sup>). Harmonic frequencies computed in the 900–1900 and 2700–3900 cm<sup>-1</sup> ranges were scaled by 0.985 and 0.955, respectively.

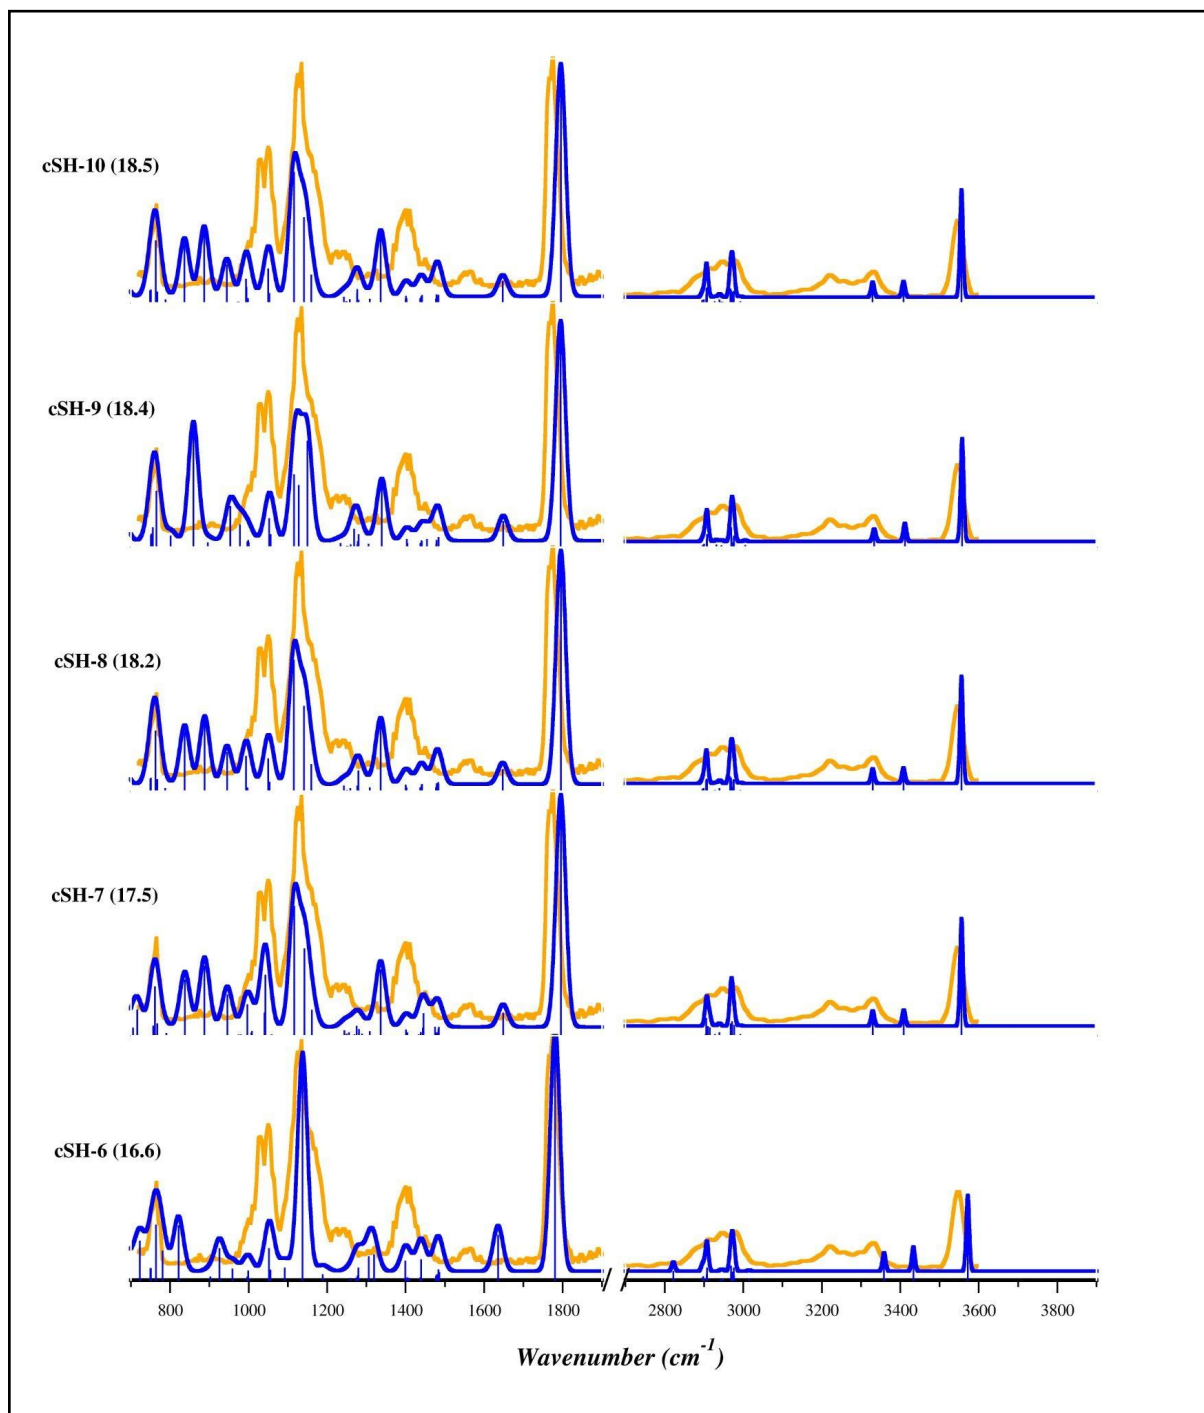

**Figure S27:** IRMPD spectrum (orange profile) of  $[(\text{Et}_3\text{P})\text{AuCys}]^+$  ion and calculated harmonic IR spectra (blue profiles) of the lowest lying conformers of **cSH** isomer, computed at the B3LYP/BS1 level of theory. Free energies relative to **cN-1** are reported in brackets (kJ mol<sup>-1</sup>). Harmonic frequencies computed in the 900–1900 and 2700–3900 cm<sup>-1</sup> ranges were scaled by 0.985 and 0.955, respectively.

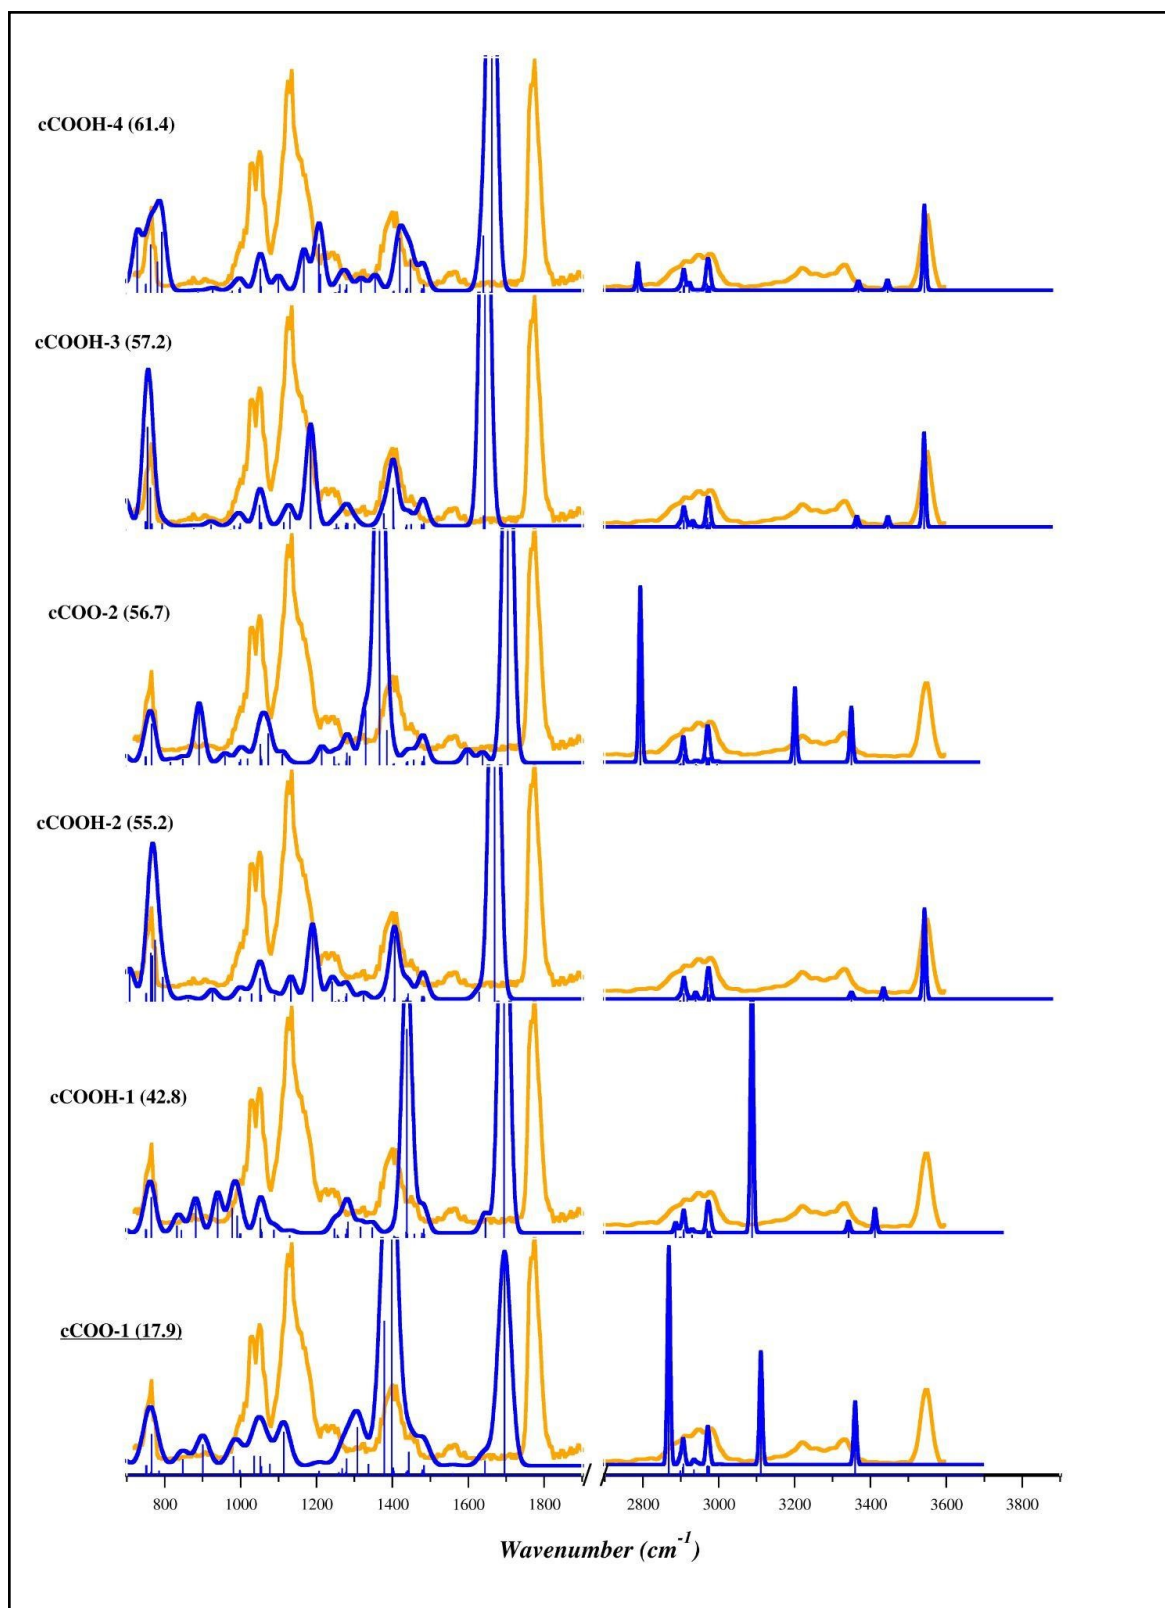

**Figure S28:** IRMPD spectrum (orange profile) of  $[(Et_3P)AuCys]^+$  ion and calculated harmonic IR spectra (blue profiles) of the lowest lying conformers of **cCOOH** and **cCOO** isomers, computed at the B3LYP/BS1 level of theory. Free energies relative to **cN-1** are reported in brackets ( $kJ\ mol^{-1}$ ). Harmonic frequencies computed in the 900–1900 and 2700–3900  $cm^{-1}$  ranges were scaled by 0.985 and 0.955, respectively.

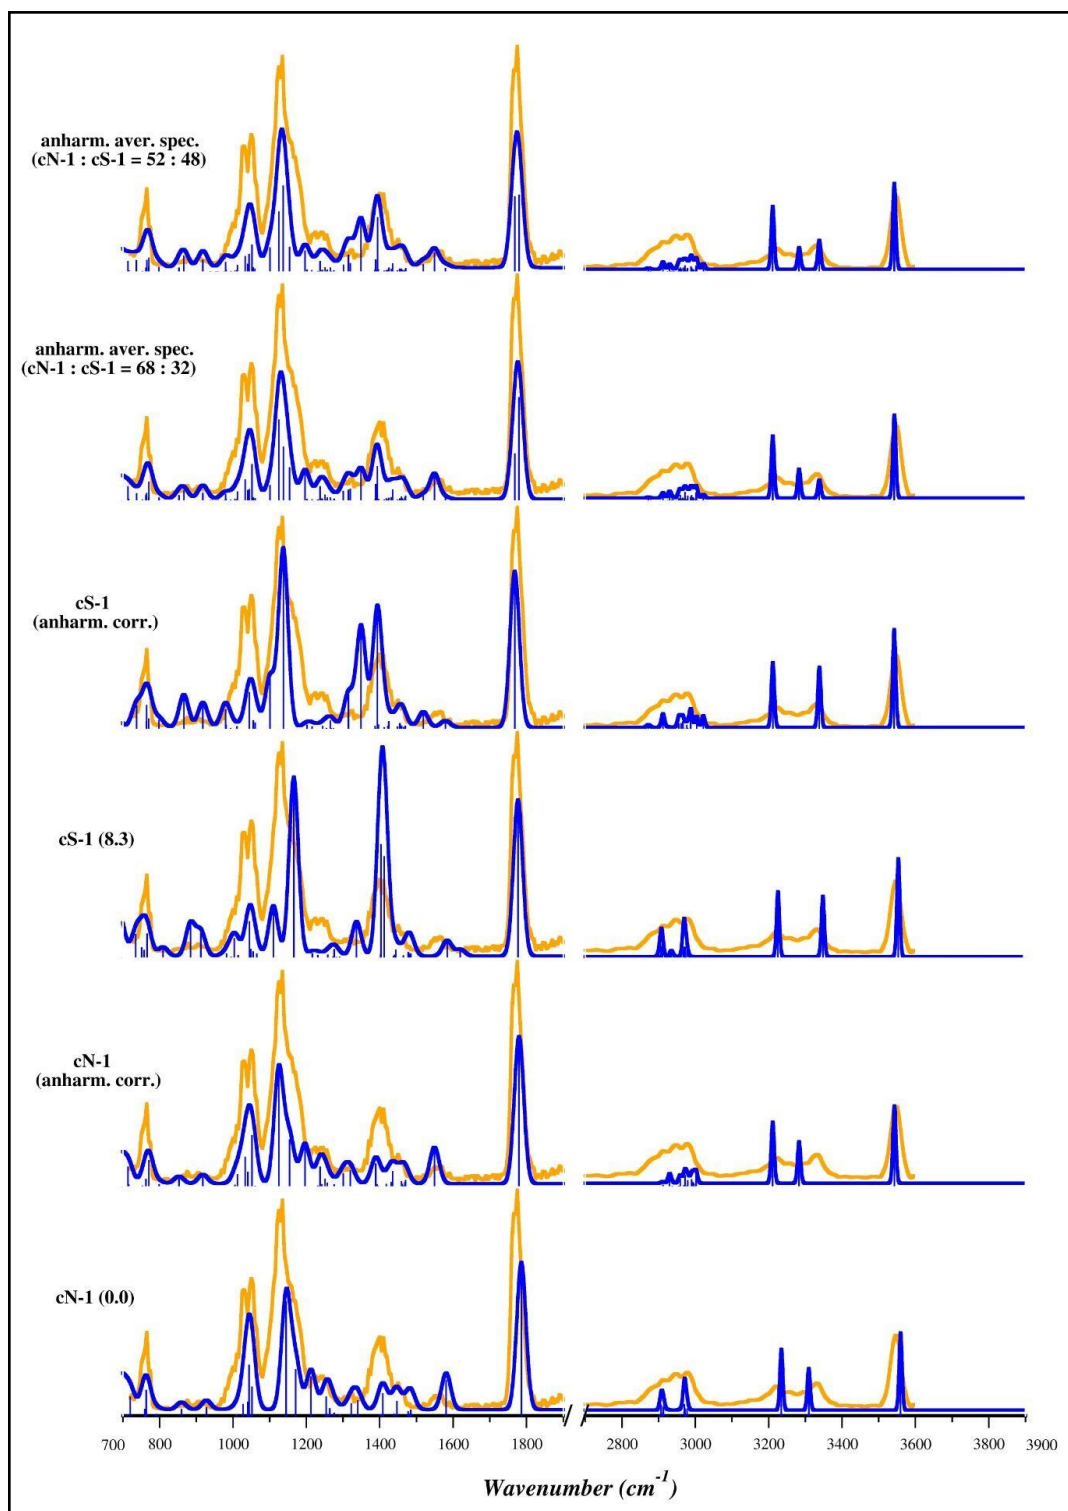

**Figure S29:** IRMPD spectrum (orange profile) of  $[(\text{Et}_3\text{P})\text{AuCys}]^+$  ion and calculated harmonic and anharmonic IR spectra (blue profiles) of **cN-1** and **cS-1**, computed at the B3LYP/BS1 level of theory. Free energies relative to **cN-1** are reported in brackets ( $\text{kJ mol}^{-1}$ ). Harmonic frequencies computed in the 900–1900 and 2700–3900  $\text{cm}^{-1}$  ranges were scaled by 0.985 and 0.955, respectively. The anharmonic averaged spectra are built by considering the contributions of **cN-1** and **cS-1** to the Boltzmann population weighted according to their relative free energy computed in 50:50 water-methanol mixture (see Table 1 for additional details).

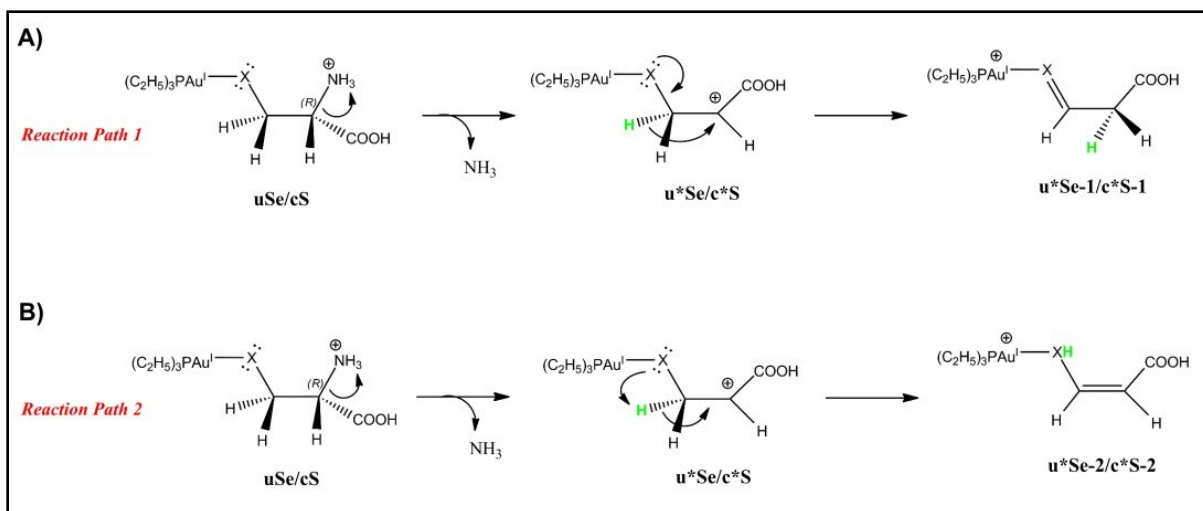

**Figure S30:** possible pathways for the deamination process of  $[(Et_3P)AuSec]^+$  and  $[(Et_3P)AuCys]^+$  ions in CID experiments leading to A) 3-sulfanylidene- or selenylenepropanoic acid derivatives ( $u^*Se-1$  or  $c^*S-1$ ) and B) 3-selenyl- or sulfanylprop-2-enoic acid derivatives ( $u^*Se-2$  or  $c^*S-2$ ). X is the Se or S atom for  $[(Et_3P)AuSec]^+$  and  $[(Et_3P)AuCys]^+$ , respectively.

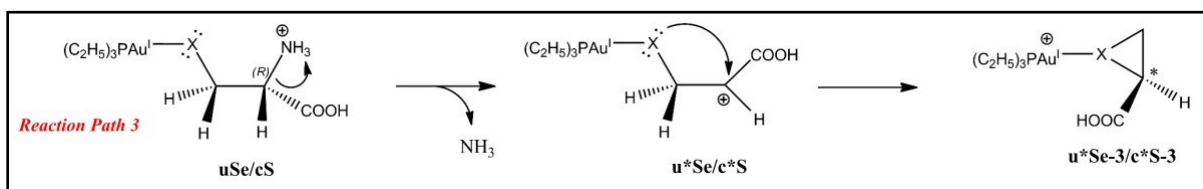

**Figure S31:** possible pathways for the deamination process of  $[(Et_3P)AuSec]^+$  and  $[(Et_3P)AuCys]^+$  ions in CID experiments leading to A) 1-(selenyl- or thiacyclopropan-2-yl)methanoic acid derivatives ( $u^*Se-1$  or  $c^*S-1$ ). X is the Se or S atom for  $[(Et_3P)AuSec]^+$  and  $[(Et_3P)AuCys]^+$ , respectively.



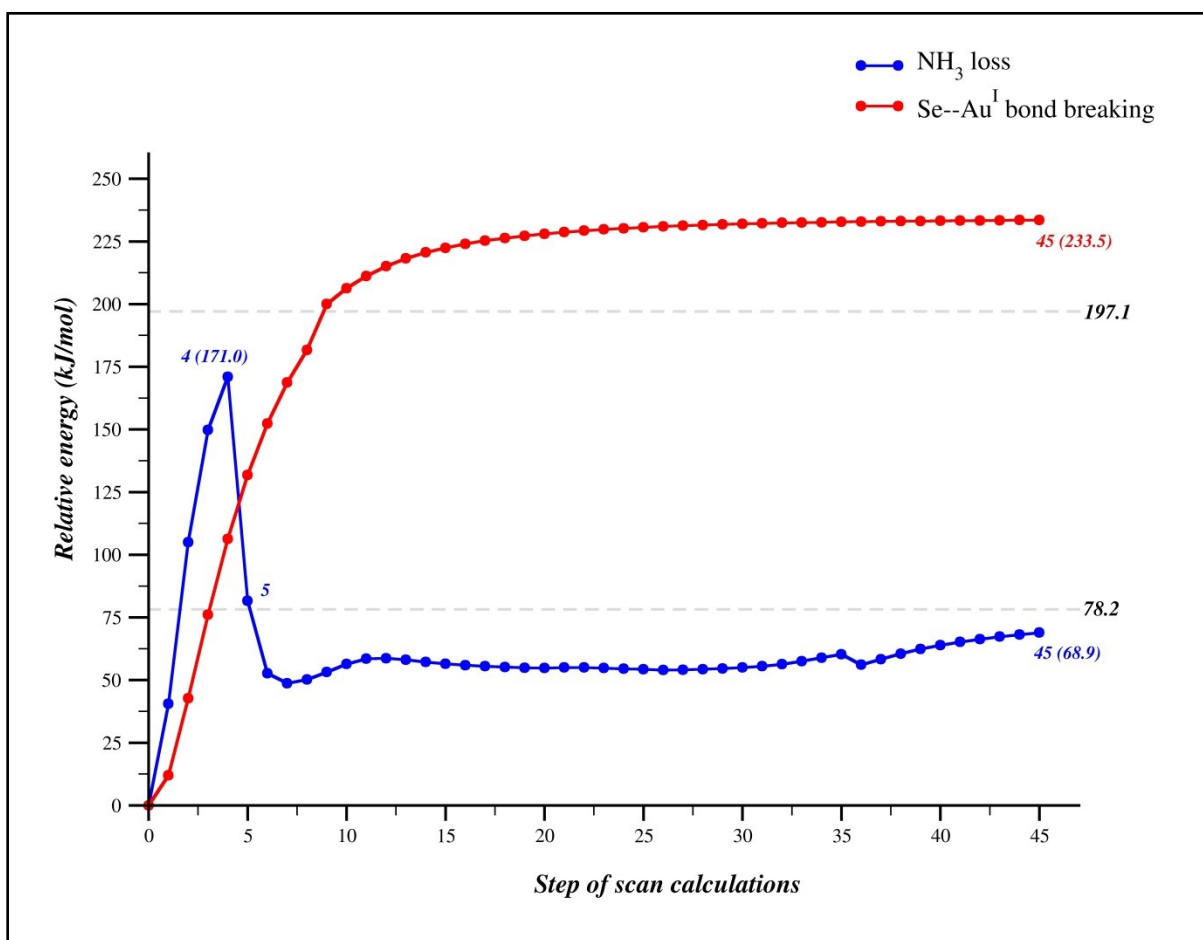

**Figure S32:** Relaxed potential energy scans for NH<sub>3</sub> loss (blue profile) and Se--Au<sup>I</sup> bond breaking (red profile) as a function of the respective reaction coordinates: C<sub>α</sub>-NH<sub>3</sub><sup>+</sup> (blue) and Au<sup>I</sup>-Se (red) bond distances for **cSe-1**. The scan step was 0.25 Å for a total of 45 steps. Relative electronic energies of transition state and the last step are reported for both reaction paths. The reaction energy computed considering reactants and products at infinite distance are reported in black. Calculations were performed at the B3LYP level of theory using the B3LYP/6-311+G(d,p)//LANL2DZ basis set in the gas phase. The structures of step 4, 5, 45 (blue profile) and 45 (red profile) are reported in Figure S34 and S35, respectively.

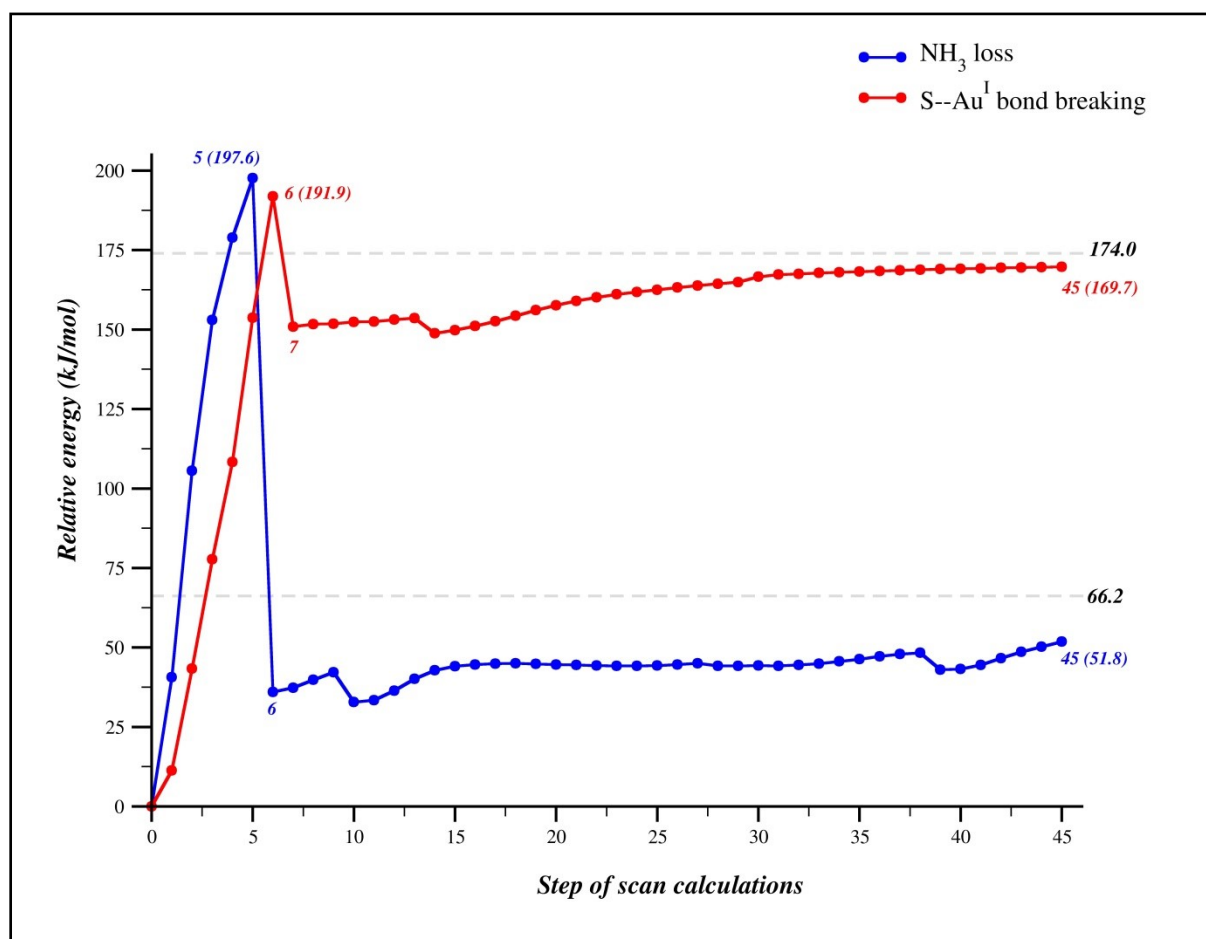

**Figure S33:** Relative electronic energies curves on NH<sub>3</sub> loss (blue profile) and S-Au<sup>I</sup> bond breaking (red profile) reactions as a function of the C<sub>α</sub>-NH<sub>3</sub><sup>+</sup> (blue profile) and Au<sup>I</sup>-S (red profile) distances for **cS-1** obtained by relaxed scan calculations. The scan step was 0.25 Å for a total of 45 steps. Relative electronic energies of transition state and the last step are reported for both reaction paths. The reaction energy computed considering reactants and products at infinite distance are reported in black. Calculations were performed at the B3LYP level of theory using the B3LYP/6-311+G(d,p)/LANL2DZ basis set in the gas phase. The structures of step 5, 6, 45 (blue profile) and 6,7, 45 (red profile) are reported in Figure S36 and S37, respectively.

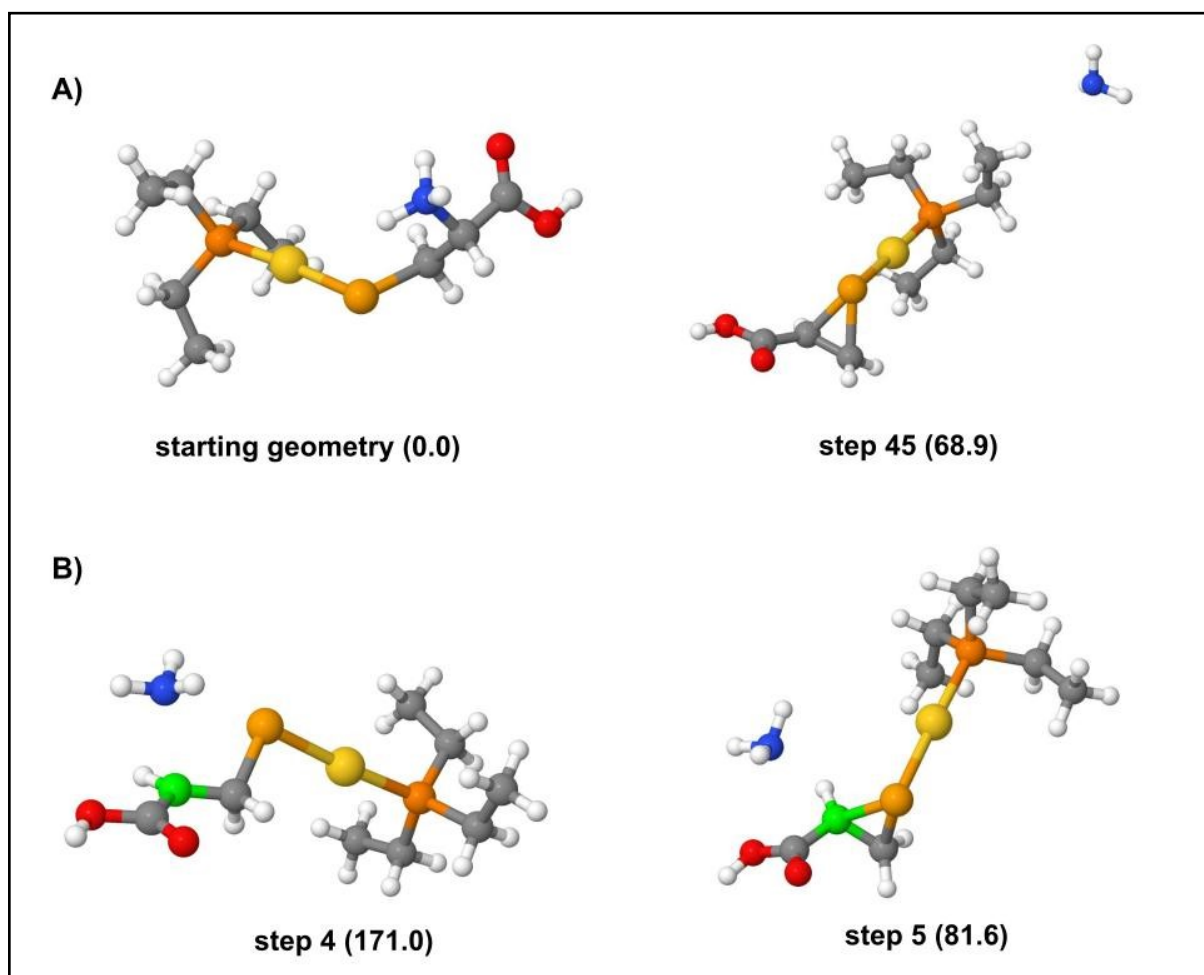

**Figure S34:** Most relevant optimized geometries of the relaxed scan calculations at the B3LYP/6-311+G(d,p)/LANL2DZ, computed for  $[(Et_3P)AuSec]^+$  along the  $C_\alpha-NH_3^+$  bond breaking reaction coordinate by using a step of 0.25 Å for a total of 45 steps (Figure S32, blue profile): A) optimized geometries of the first (**uSe-1**) and the last step (45) of scan calculation; B) optimized structures of highest energy step (step 4) and of the following one (step 5) along the reaction coordinate. The carbon  $C_\alpha$  attacked by the Se atom is colored in green. Electron energies relative to the starting geometry (**uSe-1**) are reported in brackets (kJ mol<sup>-1</sup>).

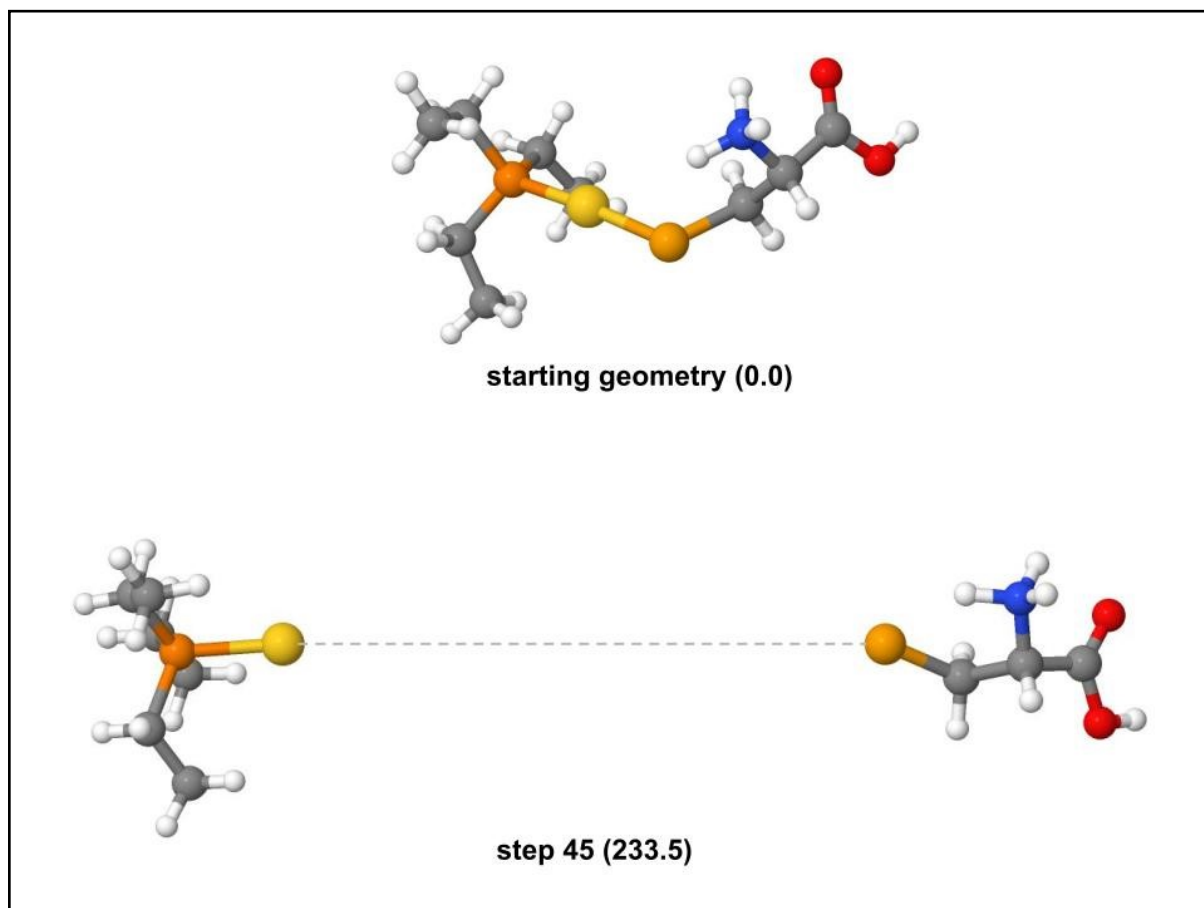

**Figure S35:** Most relevant optimized geometries of the relaxed scan calculations at the B3LYP/6-311+G(d,p)/LANL2DZ, computed for  $[(\text{Et}_3\text{P})\text{AuSec}]^+$  along the Au<sup>I</sup>-Se bond breaking reaction coordinate by using a step of 0.25 Å for a total of 45 steps (Figure S32, red profile): (on the top) optimized geometries of the first (**uSe-1**) and (on the bottom) the last step (45) of scan calculation. Notably, at the end of the scan calculation Sec remains in its zwitterionic state although the neutral form (SeH, NH<sub>2</sub>, COOH) is the lowest energy isomer when considered as an isolated species in the gas-phase. Electron energies relative to the starting geometry (**uSe-1**) are reported in brackets (kJ mol<sup>-1</sup>).

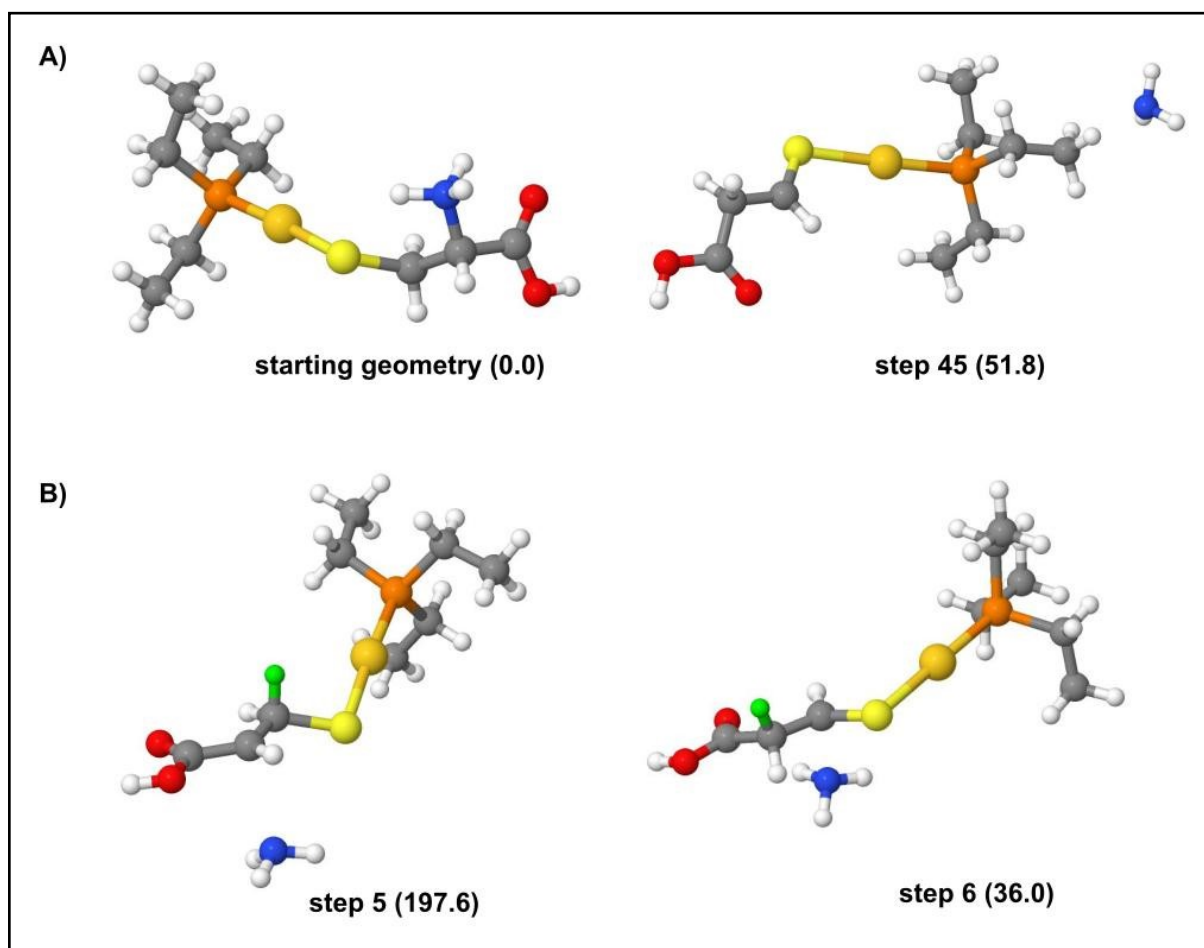

**Figure S36:** Most relevant optimized geometries of the relaxed scan calculations at the B3LYP/6-311+G(d,p)/LANL2DZ level of theory, computed for  $[(Et_3P)AuCys]^+$  along the  $C_\alpha-NH_3^+$  bond breaking reaction coordinate by using a step of 0.25 Å for a total of 45 steps (Figure S33, blue profile): A) optimized geometries of the first (**cS-1**) and the last step (45) of scan calculation; B) optimized structures of highest energy step (step 5) and of the following one (step 6) along the reaction coordinate. The hydride (H) transferred to  $C_\alpha$  is colored in green. Electron energies relative to the starting geometry (**cS-1**) are reported in brackets (kJ mol<sup>-1</sup>).

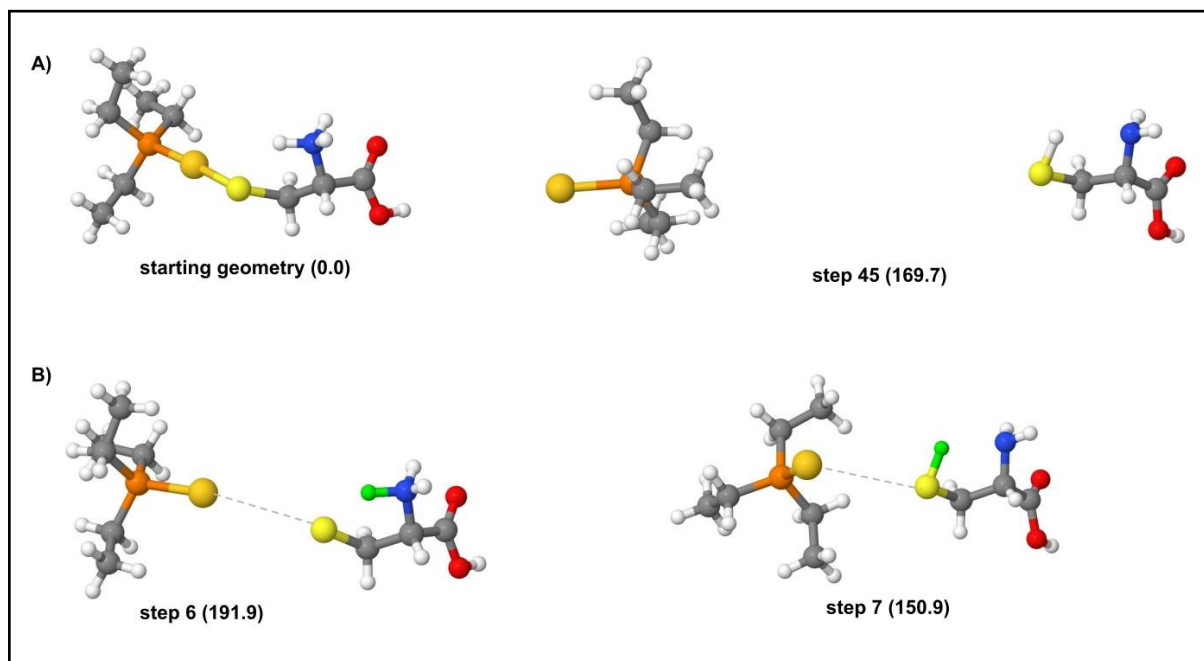

**Figure S37:** Most relevant optimized geometries of the relaxed scan calculations at the B3LYP/6-311+G(d,p)/LANL2DZ, computed for [(Et<sub>3</sub>P)AuCys]<sup>+</sup> along the Au<sup>I</sup>-S bond breaking reaction coordinate by using a step of 0.25 Å for a total of 45 steps (Figure S34, red profile): A) optimized geometries of the first (**cS-1**) and the last step (45) of scan calculation; B) optimized structures of hypothetical transition state (step 6) and of the subsequent step (step 7) along the reaction coordinate. The H atom transferred to S- from the amino group is colored in green. Electron energies relative to the starting geometry (**cS-1**) are reported in brackets (kJ mol<sup>-1</sup>).

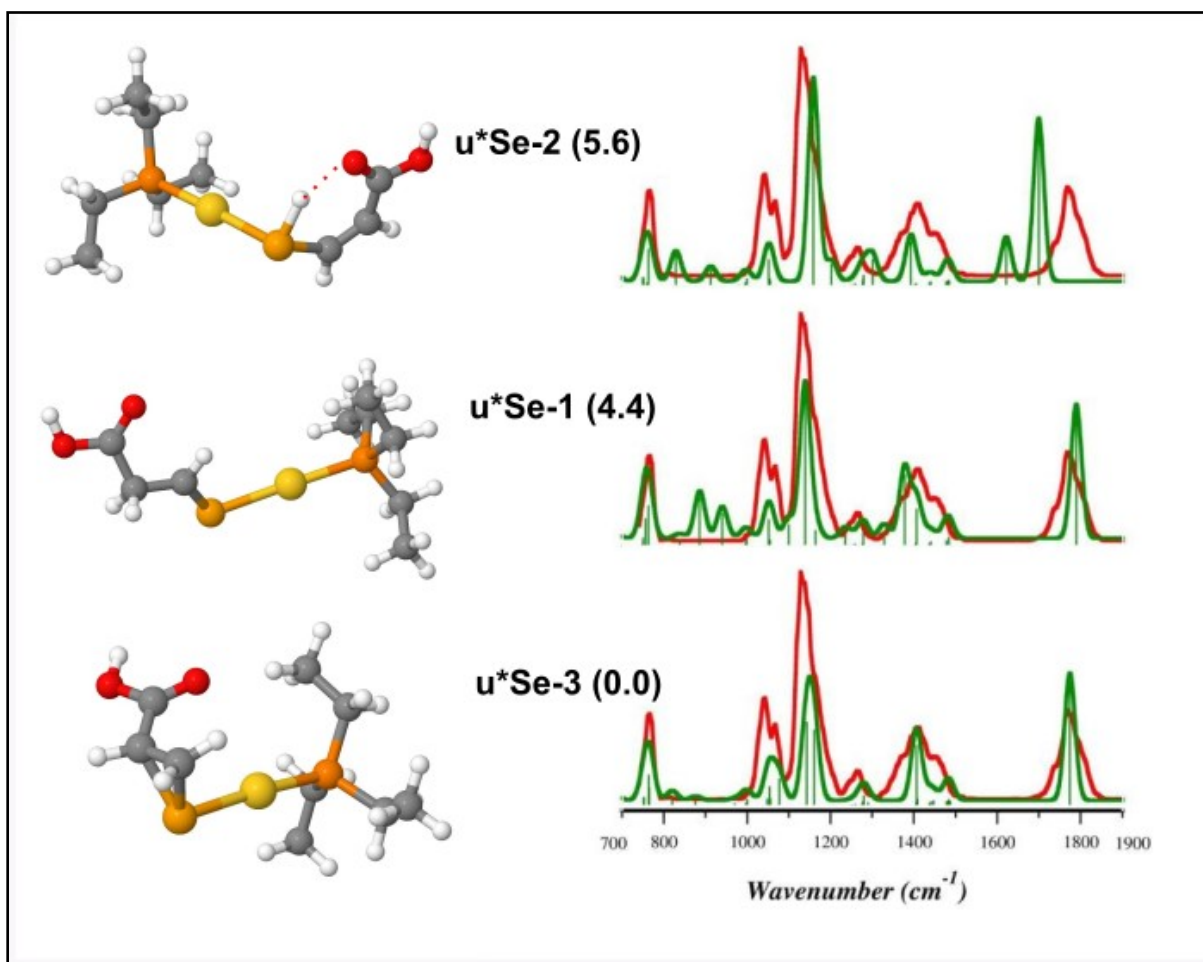

**Figure S38:** Optimized geometries along with IRMPD spectrum (red profiles) and calculated harmonic IR spectra (green profiles) of the lowest energy isomers of the  $[(Et_3P)AuSec^*]^+$  ion, computed in gas phase at B3LYP/BS1 level of theory. Harmonic frequencies computed in the 700–1900 cm<sup>-1</sup> range were scaled by 0.985. Free energy values relative to  $u^*Se-3$  are reported in parenthesis in kJ mol<sup>-1</sup>.

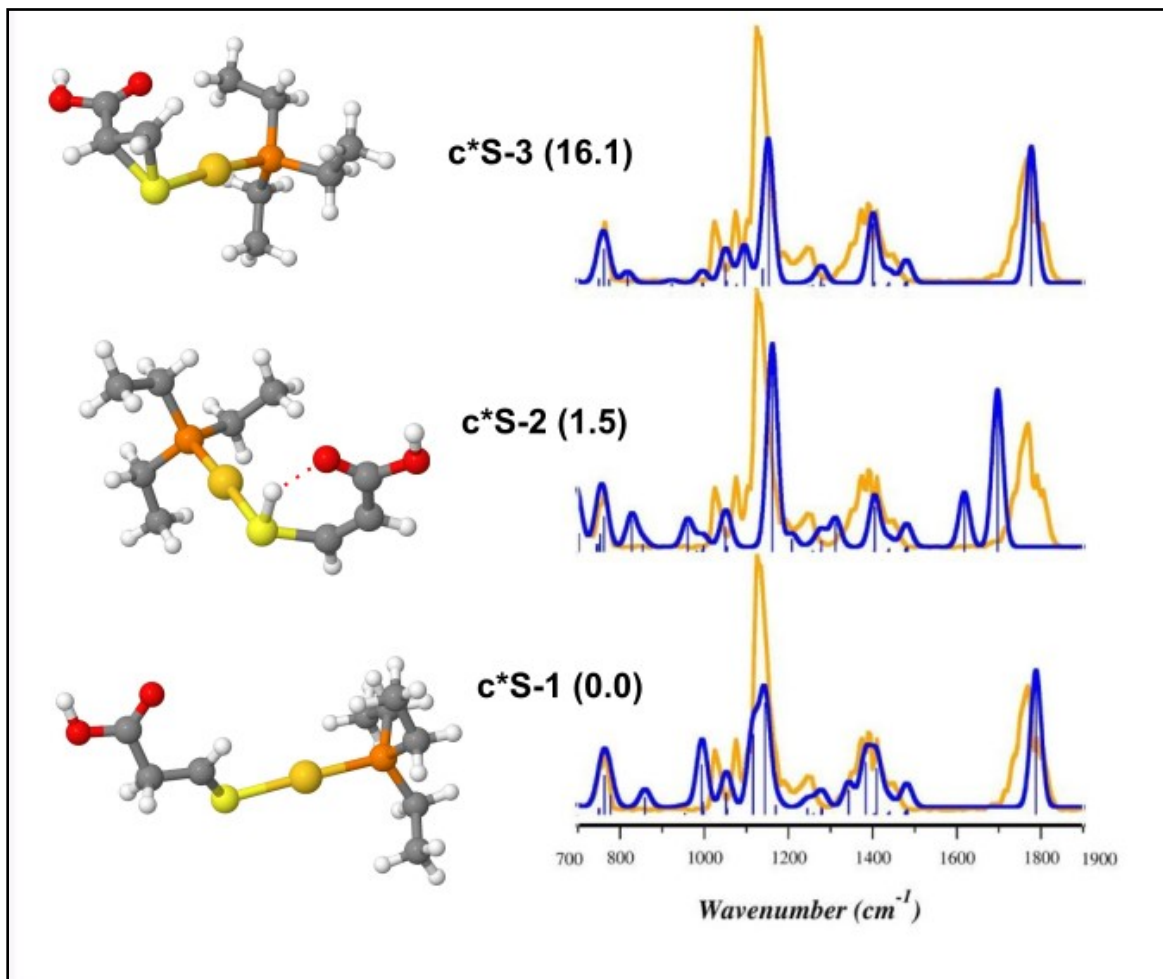

**Figure S39:** Optimized geometries along with IRMPD spectrum (orange profiles) and calculated harmonic IR spectra (blue profiles) of the lowest energy isomers of the  $[(Et_3P)AuCys^*]^+$  ion, computed in gas phase at B3LYP/BS1 level of theory. Harmonic frequencies computed in the 700–1900  $cm^{-1}$  range were scaled by 0.985. Free energy values relative to **c\*S-1** are reported in parenthesis in  $kJ\ mol^{-1}$ .



**Table S1:** relative free energies of isomers and conformers of [(Et<sub>3</sub>P)AuSec]<sup>+</sup> ion optimized in the gas phase at the B3LYP/BS1 level of theory.

| Isomers/conformers | $\Delta G$ (kJ/mol) | Isomers/conformers | $\Delta G$ (kJ/mol) |
|--------------------|---------------------|--------------------|---------------------|
| uSe-1              | 0.0                 | uN-9               | 15.1                |
| uSe-2              | 1.3                 | uN-10              | 15.8                |
| uSe-3              | 2.1                 | uSeH-1             | 16.6                |
| uSe-4              | 2.2                 | uSeH-2             | 18.9                |
| uSe-5              | 4.1                 | uSeH-3             | 19.7                |
| uSe-6              | 4.2                 | uSeH-4             | 20.0                |
| uSe-7              | 4.5                 | uSeH-5             | 20.2                |
| uSe-8              | 4.6                 | uSeH-6             | 20.4                |
| uSe-9              | 4.7                 | uSeH-7             | 21.7                |
| uSe-10             | 5.2                 | uSeH-8             | 22.7                |
| uN-1               | 7.3                 | uSeH-9             | 23.0                |
| uN-2               | 12.0                | uSeH-10            | 23.4                |
| uN-3               | 13.7                | uCOO-1             | 26.9                |
| uN-4               | 13.8                | uCOO-1             | 60.5                |
| uN-5               | 14.0                | uCOOH-1            | 66.9                |
| uN-6               | 14.1                | uCOOH-2            | 71.3                |
| uN-7               | 14.8                | uCOOH-3            | 72.1                |
| uN-8               | 14.9                |                    |                     |

**Table S2:** IRMPD absorptions of [(Et<sub>3</sub>P)AuSec]<sup>+</sup> ion and calculated vibrational frequencies (cm<sup>-1</sup>) for **uSe-1**. Calculated intensities are reported in parentheses (km mol<sup>-1</sup>). Calculated frequencies in the fingerprint (1900-700 cm<sup>-1</sup>) and X-H stretching (2000-3900 cm<sup>-1</sup>) ranges are scaled by factors of 0.985 and 0.955, respectively. Modes with intensity lower than 50 km mol<sup>-1</sup> are omitted.

| IRMPD frequencies | Calculated IR frequencies | Assignment                                                   |
|-------------------|---------------------------|--------------------------------------------------------------|
| 765               | 771 (65)                  | $\rho$ CH <sub>2</sub> (Et)                                  |
| 905               | 906 (52)                  | $\nu$ C $_{\alpha}$ -C $_{\beta}$ , $\delta_{as}$ N-H        |
| 1040              | 1045 (50)                 | $\tau$ CH <sub>2</sub> (Et)                                  |
| 1090              | 1108 (69)                 | $\delta_{as}$ N-H, $\delta$ C $_{\alpha}$ -H, $\delta_s$ O-H |
| 1150              | 1165 (321)                | $\delta_s$ O-H, $\delta_{as}$ N-H                            |
| -                 | 1340 (54)                 | $\delta$ C $_{\alpha}$ -H, $\delta_s$ O-H                    |
|                   | 1406 (98)                 | $\delta_s$ O-H, $\nu$ CO-OH, $\delta_s$ NH <sub>2</sub>      |
| 1390              | 1419 (227)                | umbrella mode NH <sub>3</sub>                                |
| 1775              | 1776 (269)                | $\nu$ C=O                                                    |
| 2000 - 2800       | 2669 (1007)               | $\nu$ N-H (involved in H bond with S atom)                   |
| 2860-2983         | 2912-2970                 | $\nu$ C-H ( <i>low intensity</i> )                           |
| 3205              | 3224 (107)                | $\nu$ N-H (involved in H bond with O=C group)                |
| 3350              | 3343 (103)                | $\nu$ N-H (free)                                             |
| 3540              | 3554 (174)                | $\nu$ O-H                                                    |

$\nu$ : stretching;  $\delta$ : bending ( $\delta_s$ : symmetric or scissoring,  $\delta_{as}$ : antisymmetric);  $\rho$ : rocking;  $\tau$ : twisting.

**Table S3:** IRMPD absorptions of [(Et<sub>3</sub>P)AuSec]<sup>+</sup> ion and calculated vibrational frequencies (cm<sup>-1</sup>) for **uN-1**. Calculated intensities are reported in parentheses (km mol<sup>-1</sup>). Calculated frequencies in the fingerprint (1900-700 cm<sup>-1</sup>) and X-H stretching (2000-3900 cm<sup>-1</sup>) ranges are scaled by factors of 0.985 and 0.955, respectively. Modes with intensity lower than 50 km mol<sup>-1</sup> are omitted.

| IRMPD frequencies | Calculated IR frequencies | Assignment                                                              |
|-------------------|---------------------------|-------------------------------------------------------------------------|
| 765               | 763 (61)                  | $\rho$ CH <sub>2</sub> (Et)                                             |
| 1040              | 1051 (74)                 | $\rho$ CH <sub>2</sub> (Et)                                             |
| 1090              | 1060 (82)                 | $\nu$ C <sub><math>\alpha</math></sub> -C <sub><math>\beta</math></sub> |
| 1150              | 1145 (79)                 | $\tau$ NH <sub>2</sub> , $\delta_s$ O-H                                 |
|                   | 1155 (116)                | $\delta_s$ O-H, $\tau$ NH <sub>2</sub>                                  |
| 1203 (s)          | 1222 (85)                 | $\omega$ NH <sub>2</sub>                                                |
|                   | 1305 (51)                 | $\delta_s$ O-H, $\delta$ C <sub><math>\alpha</math></sub> -H            |
| 1390              | -                         |                                                                         |
| -                 | 1415 (50)                 | $\delta_s$ NH <sub>2</sub>                                              |
| 1775              | 1784 (260)                | $\nu$ C=O                                                               |
| 2860-2983         | 2912-2976                 | $\nu$ C-H ( <i>low intensity</i> )                                      |
| 3205              | 3197 (149)                | $\nu$ N-H (involved in H bond with SH group)                            |
| 3350              | 3284 (94)                 | $\nu$ N-H (involved in H bond with O=C group)                           |
| 3540              | 3556 (150)                | $\nu$ O-H                                                               |

$\nu$ : stretching;  $\delta$ : bending ( $\delta_s$ : symmetric or scissoring,  $\delta_{as}$ : antisymmetric);  $\rho$ : rocking;  $\tau$ : twisting;  $\omega$ : wagging.

**Table S4:** IRMPD absorptions of [(Et<sub>3</sub>P)AuSec]<sup>+</sup> ion and calculated vibrational frequencies (cm<sup>-1</sup>) for **uSeH-1**. Calculated intensities are reported in parentheses (km mol<sup>-1</sup>). Calculated frequencies in the fingerprint (1900-700 cm<sup>-1</sup>) and X-H stretching (2000-3900 cm<sup>-1</sup>) ranges are scaled by factors of 0.985 and 0.955, respectively. Modes with intensity lower than 50 km mol<sup>-1</sup> are omitted.

| IRMPD frequencies | Calculated IR frequencies | Assignment                                                     |
|-------------------|---------------------------|----------------------------------------------------------------|
| 765               | 761 (70)                  | $\rho$ CH <sub>2</sub> (Et)                                    |
| 855               | 796 (62)                  | $\omega$ NH <sub>2</sub> , $\delta_s$ C $\beta$ H <sub>2</sub> |
| 1150              | 1136 (269)                | $\delta_s$ O-H, $\tau$ NH <sub>2</sub>                         |
| 1250 - 1290       | 1303 (50)                 | $\delta_s$ O-H, $\delta$ C $\alpha$ -H                         |
| -                 | 1634 (57)                 | $\delta_s$ NH <sub>2</sub>                                     |
| 1775              | 1780 (291)                | $\nu$ C=O                                                      |
| 2000 - 2800       | 2173 (97)                 | $\nu$ S-H                                                      |
| 2860-2983         | 2912-2976                 | $\nu$ C-H ( <i>low intensity</i> )                             |
| 3205              | 3357 (22)                 | $\nu_s$ NH <sub>2</sub>                                        |
| 3350              | 3432 (28)                 | $\nu_{as}$ NH <sub>2</sub>                                     |
| 3540              | 3574 (89)                 | $\nu$ O-H                                                      |

$\nu$ : stretching ( $\nu_s$ : symmetric or scissoring,  $\nu_{as}$ : antisymmetric);  $\delta$ : bending ( $\delta_s$ : symmetric or scissoring,  $\delta_{as}$ : antisymmetric);  $\rho$ : rocking;  $\tau$ : twisting;  $\omega$ : wagging.

**Table S5:** relative free energies of isomers and conformers of [(Et<sub>3</sub>P)AuCys]<sup>+</sup> ion optimized in the gas phase at the B3LYP/BS1 level of theory.

| Isomers/conformers | $\Delta G$ (kJ/mol) | Isomers/conformers | $\Delta G$ (kJ/mol) |
|--------------------|---------------------|--------------------|---------------------|
| cN-1               | 0.0                 | cS-9               | 12.6                |
| cN-2               | 0.3                 | cS-10              | 13.1                |
| cN-3               | 0.7                 | cSH-1              | 12.4                |
| cN-4               | 2.3                 | cSH-2              | 14.7                |
| cN-5               | 2.7                 | cSH-3              | 15.3                |
| cN-6               | 3.6                 | cSH-4              | 16.4                |
| cN-7               | 3.9                 | cSH-5              | 16.4                |
| cN-8               | 4.2                 | cSH-6              | 16.6                |
| cN-9               | 4.5                 | cSH-7              | 17.5                |
| cN-10              | 4.5                 | cSH-8              | 18.2                |
| cS-1               | 8.3                 | cSH-9              | 18.4                |
| cS-2               | 8.6                 | cSH-10             | 18.5                |
| cS-3               | 9.1                 | cCOO-1             | 17.9                |
| cS-4               | 10.5                | cCOOH-1            | 42.8                |
| cS-5               | 11.4                | cCOOH-2            | 55.2                |
| cS-6               | 11.6                | cCOO-2             | 56.7                |
| cS-7               | 12.0                | cCOOH-3            | 57.2                |
| cS-8               | 12.1                | cCOOH-4            | 61.4                |

**Table S6:** IRMPD absorptions of [(Et<sub>3</sub>P)AuCys]<sup>+</sup> ion and calculated vibrational frequencies (cm<sup>-1</sup>) for **cN-1**. Calculated intensities are reported in parentheses (km mol<sup>-1</sup>). Calculated frequencies in the fingerprint (1900-700 cm<sup>-1</sup>) and X-H stretching (2700-3900 cm<sup>-1</sup>) ranges are scaled by factors of 0.985 and 0.955, respectively. Modes with intensity lower than 50 km mol<sup>-1</sup> are omitted.

| IRMPD frequencies | Calculated IR frequencies | Assignment                                                                       |
|-------------------|---------------------------|----------------------------------------------------------------------------------|
| 773               | 763 (50)                  | $\rho$ CH <sub>2</sub> (Et)                                                      |
| 1032              | 1044 (90)                 | $\nu$ C <sub><math>\alpha</math></sub> -N, $\delta_s$ CH <sub>2</sub> (Et)       |
| 1053              | 1052 (52)                 | $\nu$ C <sub><math>\alpha</math></sub> -N                                        |
| 1142              | 1145 (201)                | $\delta_s$ O-H, $\tau$ NH <sub>2</sub>                                           |
|                   | 1171 (82)                 | $\omega$ NH <sub>2</sub> , $\tau$ C <sub><math>\beta</math></sub> H <sub>2</sub> |
| -                 | 1213 (70)                 | $\rho$ NH <sub>2</sub> , $\delta$ C <sub><math>\alpha</math></sub> -H            |
| 1409              | 1409 (40)                 | $\rho$ NH <sub>2</sub> , $\delta$ C <sub><math>\alpha</math></sub> -H            |
| 1571              | 1581 (64)                 | $\delta_s$ NH <sub>2</sub>                                                       |
| 1781              | 1786 (257)                | $\nu$ C=O                                                                        |
| 2845 - 3030       | 2910 - 2978               | $\nu$ C-H ( <i>low intensity</i> )                                               |
| 3218              | 3235 (106)                | $\nu_s$ NH <sub>2</sub>                                                          |
| 3340              | 3309 (72)                 | $\nu_{as}$ NH <sub>2</sub>                                                       |
| 3550              | 3559 (135)                | $\nu$ O-H                                                                        |

$\nu$ : stretching ( $\nu_s$ : symmetric or scissoring,  $\nu_{as}$ : antisymmetric);  $\delta$ : bending ( $\delta_s$ : symmetric or scissoring,  $\delta_{as}$ : antisymmetric);  $\rho$ : rocking;  $\tau$ : twisting;  $\omega$ : wagging.

**Table S7:** IRMPD absorptions of [(Et<sub>3</sub>P)AuCys]<sup>+</sup> ion and calculated vibrational frequencies (cm<sup>-1</sup>) for **cS-1**. Calculated intensities are reported in parentheses (km mol<sup>-1</sup>). Calculated frequencies in the fingerprint (1900-700 cm<sup>-1</sup>) and X-H stretching (2700-3900 cm<sup>-1</sup>) ranges are scaled by factors of 0.985 and 0.955, respectively. Modes with intensity lower than 50 km mol<sup>-1</sup> are omitted.

| IRMPD frequencies | Calculated IR frequencies | Assignment                                                                                         |
|-------------------|---------------------------|----------------------------------------------------------------------------------------------------|
| -                 | 735 (41)                  | $\rho$ CH <sub>2</sub> (Et)                                                                        |
| 773               | 765 (42)                  | $\rho$ CH <sub>2</sub> (Et)                                                                        |
| -                 | 885 (57)                  | $\nu$ C <sub><math>\alpha</math></sub> -C <sub><math>\beta</math></sub> , $\delta$ NH <sub>3</sub> |
| -                 | 912 (43)                  | $\nu$ C <sub><math>\alpha</math></sub> -C <sub><math>\beta</math></sub> , $\delta$ NH <sub>3</sub> |
| 1053, 1032        | 1045 (64)                 | $\delta$ CH <sub>2</sub> (Et)                                                                      |
|                   | 1110 (88)                 | $\omega$ NH <sub>2</sub> , $\delta$ C <sub><math>\alpha</math></sub> -H                            |
| 1142              | 1165 (313)                | $\delta_s$ O-H                                                                                     |
| -                 | 1337 (60)                 | $\delta$ C <sub><math>\alpha</math></sub> -H, $\delta_s$ O-H                                       |
|                   | 1404 (198)                | umbrella mode NH <sub>3</sub> , $\delta$ C <sub><math>\alpha</math></sub> -H                       |
| 1409              | 1412 (177)                | umbrella mode NH <sub>3</sub> , $\delta_s$ O-H                                                     |
| 1781              | 1776 (273)                | $\nu$ C=O                                                                                          |
| -                 | 2649 (1018)               | $\nu_{as}$ NH <sub>3</sub> (N-H ... S)                                                             |
| 2845 - 3030       | 2903 - 2977               | $\nu$ C-H ( <i>low intensity</i> )                                                                 |
| 3218              | 3225 (113)                | $\nu_{as}$ NH <sub>3</sub> (N-H ... O=C)                                                           |
| 3340              | 3347 (105)                | $\nu_{as}$ NH <sub>3</sub>                                                                         |
| 3550              | 3554 (171)                | $\nu$ O-H                                                                                          |

$\nu$ : stretching ( $\nu_s$ : symmetric or scissoring,  $\nu_{as}$ : antisymmetric);  $\delta$ : bending ( $\delta_s$ : symmetric or scissoring,  $\delta_{as}$ : antisymmetric);  $\rho$ : rocking;  $\tau$ : twisting;  $\omega$ : wagging.

Vibrational mode with intensity below 50

**Table S8:** IRMPD absorptions of [(Et<sub>3</sub>P)AuCys]<sup>+</sup> ion and calculated vibrational frequencies (cm<sup>-1</sup>) for **cSH-1**. Calculated intensities are reported in parentheses (km mol<sup>-1</sup>). Calculated frequencies in the fingerprint (1900-700 cm<sup>-1</sup>) and X-H stretching (2700-3900 cm<sup>-1</sup>) ranges are scaled by factors of 0.985 and 0.955, respectively. Modes with intensity lower than 50 km mol<sup>-1</sup> are omitted.

| IRMPD frequencies | Calculated IR frequencies | Assignment                            |
|-------------------|---------------------------|---------------------------------------|
| -                 | 721 (52)                  | $\delta$ Cys (molecular deformation)  |
| 773               | 769 (65)                  | $\rho$ CH <sub>2</sub> (Et)           |
| -                 | 821 (68)                  | $\delta$ SH, $\omega$ NH <sub>2</sub> |
| 1032, 1053        | -                         |                                       |
| 1142              | 1137 (271)                | $\delta_s$ O-H                        |
| 1409              | -                         |                                       |
| 1571              | 1635 (56)                 | $\delta_s$ NH <sub>2</sub>            |
| 1781              | 1780 (298)                | $\nu$ C=O                             |
| -                 | 2421 (177)                | $\nu$ S-H                             |
| 2845 - 3030       | 2984 - 2897               | $\nu$ C-H ( <i>low intensity</i> )    |
| 3218              | 3359 (22)                 | $\nu_s$ NH <sub>2</sub>               |
| 3340              | 3433 (30)                 | $\nu_{as}$ NH <sub>2</sub>            |
| 3550              | 3572 (94)                 | $\nu$ O-H                             |

$\nu$ : stretching ( $\nu_s$ : symmetric or scissoring,  $\nu_{as}$ : antisymmetric);  $\delta$ : bending ( $\delta_s$ : symmetric or scissoring,  $\delta_{as}$ : antisymmetric);  $\rho$ : rocking;  $\tau$ : twisting;  $\omega$ : wagging.

Vibrational mode with intensity below 50



**Table S9:** relative free energies of isomers and conformers of deaminated [(Et<sub>3</sub>P)AuSec\*]<sup>+</sup> and [(Et<sub>3</sub>P)AuCys\*]<sup>+</sup> ions optimized in the gas phase at the B3LYP/BS1 level of theory.

| Isomers/conformers | $\Delta G$ (kJ/mol) | Isomers/conformers | $\Delta G$ (kJ/mol) |
|--------------------|---------------------|--------------------|---------------------|
| u*Se-3             | 0.0                 | c*S-1              | 0.0                 |
| u*Se-1             | 4.4                 | c*S-2              | 1.5                 |
| u*Se-2             | 5.6                 | c*S-3              | 16.1                |

**Table S10:** IRMPD absorptions of [(Et<sub>3</sub>P)AuSec\*]<sup>+</sup> ion and calculated vibrational frequencies (cm<sup>-1</sup>) for **u\*Se-3**. Calculated intensities are reported in parentheses (km mol<sup>-1</sup>). Calculated frequencies in the fingerprint (1900-700 cm<sup>-1</sup>) and range are scaled by factors of 0.985. Non relevant modes with intensity lower than 50 km mol<sup>-1</sup> are omitted.

| IRMPD frequencies | Calculated IR frequencies | Assignment                                                                                                                        |
|-------------------|---------------------------|-----------------------------------------------------------------------------------------------------------------------------------|
| 769               | 762 (59)                  | $\delta$ CH <sub>2</sub> /CH <sub>3</sub> (Et)                                                                                    |
| 1045              | 1053 (36)                 | $\tau$ CH <sub>2</sub> /CH <sub>3</sub> (Et)                                                                                      |
| 1071              | 1076 (51)                 | $\delta$ C <sub><math>\alpha</math></sub> -H, $\omega$ C <sub><math>\beta</math></sub> H <sub>2</sub>                             |
| 1133              | 1142 (160)                | $\nu$ C-OH, $\nu$ C <sub><math>\alpha</math></sub> -C <sub><math>\beta</math></sub>                                               |
|                   | 1159 (145)                | $\nu$ C <sub><math>\alpha</math></sub> -C <sub><math>\beta</math></sub> , $\delta$ C <sub><math>\beta</math></sub> H <sub>2</sub> |
| 1273              | 1279 (19)                 | $\delta$ CH <sub>2</sub> /CH <sub>3</sub> (Et)                                                                                    |
| 1418              | 1406 (116)                | $\delta_s$ O-H, $\nu$ C <sub><math>\alpha</math></sub> -COOH                                                                      |
| 1777              | 1773 (244)                | $\nu$ C=O                                                                                                                         |

$\nu$ : stretching ( $\nu_s$ : symmetric or scissoring,  $\nu_{as}$ : antisymmetric);  $\delta$ : bending ( $\delta_s$ : symmetric or scissoring,  $\delta_{as}$ : antisymmetric);  $\rho$ : rocking;  $\tau$ : twisting;  $\omega$ : wagging.

**Table S11:** IRMPD absorptions of  $[(Et_3P)AuSec^*]^+$  ion and calculated vibrational frequencies ( $cm^{-1}$ ) for **u\*Se-1**. Calculated intensities are reported in parentheses ( $km\ mol^{-1}$ ). Calculated frequencies in the fingerprint ( $1900-700\ cm^{-1}$ ) and range are scaled by factors of 0.985. Non relevant modes with intensity lower than  $50\ km\ mol^{-1}$  are omitted.

| IRMPD frequencies | Calculated IR frequencies | Assignment                                                                          |
|-------------------|---------------------------|-------------------------------------------------------------------------------------|
|                   | 755 (51)                  | $\delta\ C_{\beta}\text{-H}$                                                        |
| 769               |                           |                                                                                     |
|                   | 762 (76)                  | $\delta\ CH_2/CH_3\ (Et)$                                                           |
| -                 | 886 (91)                  | $\delta\ C_{\beta}\text{-H},$                                                       |
| -                 | 939 (61)                  | $\rho\ C_{\alpha}H_2, \delta\ C_{\beta}\text{-H}$                                   |
| 1045              | 1050 (50)                 | $\delta\ CH_2/CH_3\ (Et)$                                                           |
| 1071              | 1098 (40)                 | $\nu\ C_{\alpha}\text{-}C_{\beta}$                                                  |
| 1133              | 1138 (298)                | $\nu\ C\text{-OH}, \delta_s\ O\text{-H}, \delta\ C_{\alpha}H_2, \delta\ C_{\beta}H$ |
| 1273              | 1277 (29)                 | $\delta\ CH_2/CH_3\ (Et)$                                                           |
|                   | 1377 (136)                | $\delta_s\ O\text{-H}, \nu\ C_{\alpha}\text{-COOH}$                                 |
| 1418              |                           |                                                                                     |
|                   | 1406 (70)                 | $\delta_s\ C_{\alpha}H_2$                                                           |
| 1777              | 1789 (258)                | $\nu\ C=O$                                                                          |

$\nu$ : stretching ( $\nu_s$ : symmetric or scissoring,  $\nu_{as}$ : antisymmetric);  $\delta$ : bending ( $\delta_s$ : symmetric or scissoring,  $\delta_{as}$ : antisymmetric);  $\rho$ : rocking;  $\tau$ : twisting;  $\omega$ : wagging.

**Table S12:** IRMPD absorptions of [(Et<sub>3</sub>P)AuCys\*]<sup>+</sup> ion and calculated vibrational frequencies (cm<sup>-1</sup>) for **c\*S-1**. Calculated intensities are reported in parentheses (km mol<sup>-1</sup>). Calculated frequencies in the fingerprint (1900-700 cm<sup>-1</sup>) and range are scaled by factors of 0.985. Non relevant modes with intensity lower than 50 km mol<sup>-1</sup> are omitted.

| IRMPD frequencies  | Calculated IR frequencies | Assignment                                                                               |
|--------------------|---------------------------|------------------------------------------------------------------------------------------|
| 769                | 762 (75)                  | $\delta$ CH <sub>2</sub> /CH <sub>3</sub> (Et)                                           |
| 1028               | 994 (96)                  | $\delta$ CH <sub>2</sub> /CH <sub>3</sub> (Et), cys deformation                          |
| 1084               | 1052 (43)                 | $\tau$ CH <sub>2</sub> /CH <sub>3</sub> (Et)                                             |
| 1128               | 1116 (154)                | $\nu$ C <sub><math>\alpha</math></sub> -C <sub><math>\beta</math></sub> , $\delta_s$ O-H |
| 1145               | 1144 (214)                | $\nu$ C-OH, $\delta_s$ O-H, $\delta$ C <sub><math>\beta</math></sub> H                   |
| 1255               | -                         |                                                                                          |
|                    | 1344 (47)                 | $\delta$ C <sub><math>\beta</math></sub> H, $\delta_s$ O-H                               |
| 1396 (1373 - 1418) | 1383 (101)                | $\delta_s$ O-H, $\delta_s$ C <sub><math>\alpha</math></sub> H <sub>2</sub>               |
|                    | 1410 (89)                 | $\delta_s$ C <sub><math>\alpha</math></sub> H <sub>2</sub>                               |
| 1772               | 1788 (260)                | $\nu$ C=O                                                                                |

$\nu$ : stretching ( $\nu_s$ : symmetric or scissoring,  $\nu_{as}$ : antisymmetric);  $\delta$ : bending ( $\delta_s$ : symmetric or scissoring,  $\delta_{as}$ : antisymmetric);  $\rho$ : rocking;  $\tau$ : twisting;  $\omega$ : wagging.

**Table S13:** IRMPD absorptions of [(Et<sub>3</sub>P)AuCys\*]<sup>+</sup> ion and calculated vibrational frequencies (cm<sup>-1</sup>) for **c\*S-3**. Calculated intensities are reported in parentheses (km mol<sup>-1</sup>). Calculated frequencies in the fingerprint (1900-700 cm<sup>-1</sup>) and range are scaled by factors of 0.985. Non relevant modes with intensity lower than 50 km mol<sup>-1</sup> are omitted.

| IRMPD frequencies  | Calculated IR frequencies | Assignment                                                                                                            |
|--------------------|---------------------------|-----------------------------------------------------------------------------------------------------------------------|
| 769                | 763 (71)                  | $\delta$ CH <sub>2</sub> /CH <sub>3</sub> (Et)                                                                        |
| 1028               | 1051 (45)                 | $\delta$ CH <sub>2</sub> /CH <sub>3</sub> (Et)                                                                        |
| 1084               | 1097 (70)                 | $\delta$ C <sub><math>\alpha</math></sub> -H                                                                          |
| 1128               | -                         |                                                                                                                       |
| 1145               | 1153 (256)                | $\nu$ C-OH, $\delta_s$ O-H                                                                                            |
| 1255               | -                         |                                                                                                                       |
| 1396 (1373 - 1418) | 1402 (120)                | $\delta_s$ O-H, $\delta$ C <sub><math>\alpha</math></sub> -H, $\delta$ C <sub><math>\beta</math></sub> H <sub>2</sub> |
| 1772               | 1778 (259)                | $\nu$ C=O                                                                                                             |

$\nu$ : stretching ( $\nu_s$ : symmetric or scissoring,  $\nu_{as}$ : antisymmetric);  $\delta$ : bending ( $\delta_s$ : symmetric or scissoring,  $\delta_{as}$ : antisymmetric);  $\rho$ : rocking;  $\tau$ : twisting;  $\omega$ : wagging.
